# Supplementary material for: c-Kit modifies the inflammatory status of smooth muscle cells
Source: PeerJ. 2017 Jun 13;5:e3418. doi: 10.7717/peerj.3418 (PMC5472039; doi:10.7717/peerj.3418)
Supplement: Supplemental Information 2 [file peerj-05-3418-s005.xlsx]

## Sheet: Sheet1
Associated Gene Name	Gene Description	T-Test P: WWv vs WT	T-Test FDR: WWv vs WT	Fold Change: WWv / WT	Oligo ID	Kit+/+ #1	Kit+/+ #2	Kit+/+ #3	KitW/W-v #1	KitW/W-v #2	KitW/W-v #3	Average: WT	Average: WWv
Tusc5	tumor suppressor candidate 5 [Source:MGI Symbol;Acc:MGI:3029307]	4.60262e-05	0.554216	1.48195	mMC005964	587.866	614.398	578.362	880.43	863.208	894.574	593.347	879.31
Man1a2	mannosidase, alpha, class 1A, member 2 [Source:MGI Symbol;Acc:MGI:104676]	8.12218e-05	0.554216	0.427256	mMR026485	350.589	394.698	370.239	162.752	146.992	167.028	371.406	158.685
Ak6	adenylate kinase 6 [Source:MGI Symbol;Acc:MGI:5510732]	8.75728e-05	0.554216	1.8889	mMC025682	4332	4018.31	3788.93	7751.31	7592.29	7553.15	4040.32	7631.77
6030458C11Rik	RIKEN cDNA 6030458C11 gene [Source:MGI Symbol;Acc:MGI:1925127]	0.000158284	0.563073	1.79516	mMC026308	286.669	267.253	270.559	464.726	526.804	489.812	274.698	493.127
Commd7	COMM domain containing 7 [Source:MGI Symbol;Acc:MGI:1914197]	0.000165519	0.563073	0.578548	mMR026227	2992.6	2722.94	2957.53	1757.92	1654.4	1604.7	2888.5	1671.13
Dctn1	dynactin 1 [Source:MGI Symbol;Acc:MGI:107745]	0.000178616	0.563073	1.83723	mMC015035	478.428	471.736	533.451	873.567	902.669	946.834	493.783	907.193
Tnfaip3	tumor necrosis factor, alpha-induced protein 3 [Source:MGI Symbol;Acc:MGI:1196377]	0.000252057	0.563073	3.46109	mMC002633	933.613	968.199	1048.28	2968.75	3240.73	4083.48	982.207	3399.51
Apol8	apolipoprotein L 8 [Source:MGI Symbol;Acc:MGI:2444921]	0.000264221	0.563073	1.6268	mMC013716	230.498	231.112	207.027	370.604	350.216	365.822	222.59	362.109
Slc38a9	solute carrier family 38, member 9 [Source:MGI Symbol;Acc:MGI:1918839]	0.0002666	0.563073	2.16606	mMC021463	1501.14	1342.92	1649.64	3361.91	3102.62	3240.14	1492.64	3233.15
Rps13	ribosomal protein S13 [Source:MGI Symbol;Acc:MGI:1915302]	0.000344328	0.652912	2.29876	mMC003613	285.701	318.612	303.421	678.46	787.246	628.148	302.278	694.863
Clcn3	chloride channel, voltage-sensitive 3 [Source:MGI Symbol;Acc:MGI:103555]	0.000468007	0.7154	1.63368	mMR026977	742.822	711.408	805.106	1212.8	1300.24	1176.37	752.117	1228.72
Prpf4	PRP4 pre-mRNA processing factor 4 homolog (yeast) [Source:MGI Symbol;Acc:MGI:1917302]	0.000482507	0.7154	1.75802	mMR026658	162.704	155.026	174.166	309.817	288.065	267.45	163.778	287.925
Rabac1	Rab acceptor 1 (prenylated) [Source:MGI Symbol;Acc:MGI:1201692]	0.000490074	0.7154	0.670176	mMA031727	2567.43	2649.71	2581.81	1697.13	1875.38	1661.06	2599.41	1742.06
Trp53i13	transformation related protein 53 inducible protein 13 [Source:MGI Symbol;Acc:MGI:1915125]	0.000563606	0.743079	0.683311	mMC024518	764.129	840.755	784.293	557.867	516.939	557.443	795.741	543.739
Lcp1	lymphocyte cytosolic protein 1 [Source:MGI Symbol;Acc:MGI:104808]	0.000641066	0.743079	0.425173	mMC020079	346.715	400.405	358.19	182.361	144.032	145.509	367.729	156.349
Slc25a4	solute carrier family 25 (mitochondrial carrier, adenine nucleotide translocator), member 4 [Source:MGI Symbol;Acc:MGI:1353495]	0.000710332	0.743079	1.407	mMC007733	6717.36	6997.09	7460.64	10257.3	9585.07	9934.58	7051.76	9921.85
Fam131b	family with sequence similarity 131, member B [Source:MGI Symbol;Acc:MGI:1923406]	0.000781756	0.743079	2.4103	mMC019106	47.4554	57.0648	43.8153	110.789	113.45	132.188	49.139	118.44
Clcc1	chloride channel CLIC-like 1 [Source:MGI Symbol;Acc:MGI:2385186]	0.000881286	0.743079	1.62747	mMC020510	73.6043	70.3799	65.7229	123.535	111.477	106.57	69.8269	113.641
Rab29	RAB29, member RAS oncogene family [Source:MGI Symbol;Acc:MGI:2385107]	0.000942915	0.743079	0.282141	mMC016660	4310.69	2987.34	4256.65	1028.48	955.942	1252.2	3798.69	1071.76
Polr3f	polymerase (RNA) III (DNA directed) polypeptide F [Source:MGI Symbol;Acc:MGI:1924086]	0.00100627	0.743079	1.40842	mMR028624	51.3293	49.4562	55.8645	71.5717	73.0028	75.8287	52.1483	73.4465
Pld3	phospholipase D family, member 3 [Source:MGI Symbol;Acc:MGI:1333782]	0.00112529	0.743079	0.481159	mMC008128	3333.5	3744.4	4266.51	1873.61	1933.59	1637.49	3762.29	1810.26
Ikbkb	inhibitor of kappaB kinase beta [Source:MGI Symbol;Acc:MGI:1338071]	0.0013172	0.743079	1.34058	mMR027870	875.504	864.532	843.444	1076.52	1192.71	1197.89	861.057	1154.31
		0.00132443	0.743079	1.73913	mMC024057	113.312	112.227	93.1074	190.204	174.615	187.522	105.792	183.986
Ipp	IAP promoted placental gene [Source:MGI Symbol;Acc:MGI:96581]	0.00139206	0.743079	1.41704	mMC006242	404.824	390.894	360.381	553.945	516.939	566.666	384.913	545.437
		0.00140032	0.743079	0.657075	mMC013841	2959.67	2949.3	3042.97	1841.26	2175.29	1881.37	2983.69	1960.51
Ccdc173	coiled-coil domain containing 173 [Source:MGI Symbol;Acc:MGI:1923100]	0.00145097	0.743079	1.98164	mMC019614	61.0141	48.5051	58.0552	101.965	107.531	121.941	55.5929	110.165
Pth1r	parathyroid hormone 1 receptor [Source:MGI Symbol;Acc:MGI:97801]	0.00154989	0.743079	0.184646	mMC005800	247.93	246.33	429.39	69.6108	50.3127	47.1367	297.098	54.8578
Vsnl1	visinin-like 1 [Source:MGI Symbol;Acc:MGI:1349453]	0.00167115	0.743079	1.58085	mMR028580	363.179	370.921	349.427	518.65	565.278	634.297	361.066	570.79
Ccdc43	coiled-coil domain containing 43 [Source:MGI Symbol;Acc:MGI:1289318]	0.0016803	0.743079	1.30179	mMC022822	978.163	918.743	870.828	1185.34	1224.28	1189.69	921.537	1199.64
Prnp	prion protein [Source:MGI Symbol;Acc:MGI:97769]	0.00173587	0.743079	0.668678	mMC025621	12912.7	13486.3	15320	8965.09	9414.4	9450.92	13869.4	9274.14
Atp6v1g1	ATPase, H+ transporting, lysosomal V1 subunit G1 [Source:MGI Symbol;Acc:MGI:1913540]	0.00182438	0.743079	2.24091	mMC019455	373.832	262.498	278.227	685.324	665.904	673.236	301.116	674.774
		0.00183776	0.743079	0.554941	mMC010391	485.207	484.1	434.867	298.052	249.591	234.659	467.455	259.409
Ccser2	coiled-coil serine rich 2 [Source:MGI Symbol;Acc:MGI:101859]	0.00192371	0.743079	0.549766	mMC016601	132.681	152.173	125.969	78.4347	80.895	66.6063	136.501	75.0438
Pofut2	protein O-fucosyltransferase 2 [Source:MGI Symbol;Acc:MGI:1916863]	0.00194862	0.743079	0.632401	mMR001481	978.163	1114.67	939.838	641.204	677.742	596.382	1008.18	637.571
Rab8b	RAB8B, member RAS oncogene family [Source:MGI Symbol;Acc:MGI:2442982]	0.00196754	0.743079	0.697337	mMC004995	272.142	304.346	259.605	197.067	197.305	187.522	278.073	193.911
Rbms2	RNA binding motif, single stranded interacting protein 2 [Source:MGI Symbol;Acc:MGI:1861776]	0.0020523	0.743079	1.9442	mMC001819	1833.33	1459.91	1864.34	3022.68	3581.08	3387.7	1708.82	3322.29
		0.00206006	0.743079	1.55401	mMC022870	71.6674	58.967	66.8183	98.0434	106.545	101.446	65.6057	101.952
Fkbp9	FK506 binding protein 9 [Source:MGI Symbol;Acc:MGI:1350921]	0.00212158	0.743079	0.662907	mMC009671	20652.8	24178.4	21438.8	14596.7	13790.6	15492.6	22039.5	14610.1
Adra2a	adrenergic receptor, alpha 2a [Source:MGI Symbol;Acc:MGI:87934]	0.00224176	0.743079	0.154087	mMC017812	71.6674	72.2821	60.246	17.6478	7.89219	8.1977	67.8308	10.4519
Tef	thyrotroph embryonic factor [Source:MGI Symbol;Acc:MGI:98663]	0.0022797	0.743079	1.49686	mMA032056	145.272	150.271	166.498	248.05	215.062	228.511	153.752	230.146
Pdik1l	PDLIM1 interacting kinase 1 like [Source:MGI Symbol;Acc:MGI:2385213]	0.00228752	0.743079	0.643156	mMC020884	555.906	672.414	649.561	402.958	418.286	383.242	623.858	401.238
Serping1	serine (or cysteine) peptidase inhibitor, clade G, member 1 [Source:MGI Symbol;Acc:MGI:894696]	0.00231236	0.743079	0.244752	mMC002616	9127.9	15307.6	12954	3377.6	3453.82	2274.86	12186.9	2982.78
Cd68	CD68 antigen [Source:MGI Symbol;Acc:MGI:88342]	0.0023922	0.743079	0.476054	mMC007570	1662.88	1827.98	2323.3	962.786	944.103	838.214	1918.58	913.345
		0.00240775	0.743079	1.87144	mMC017663	158.83	182.607	139.113	307.856	271.294	316.636	159.199	297.931
Wdr11	WD repeat domain 11 [Source:MGI Symbol;Acc:MGI:1920230]	0.00242356	0.743079	0.782084	mMC001826	1289.04	1154.61	1254.21	989.258	942.13	958.106	1231.28	962.967
Pcdha8	protocadherin alpha 8 [Source:MGI Symbol;Acc:MGI:2681879]	0.00244158	0.743079	2.26445	mMC021403	71.6674	62.7713	77.7721	138.241	150.938	194.695	70.4642	159.562
Luc7l3	LUC7-like 3 (S. cerevisiae) [Source:MGI Symbol;Acc:MGI:1914934]	0.00245224	0.743079	1.45393	mMC020725	9748.7	9903.6	10271.4	13102.5	15660.1	14854.2	9972.17	14498.8
Postn	periostin, osteoblast specific factor [Source:MGI Symbol;Acc:MGI:1926321]	0.00266163	0.743079	0.473311	mMC024386	50.3608	55.1626	67.9137	28.4326	23.6766	29.7166	57.3542	27.1464
Gpr176	G protein-coupled receptor 176 [Source:MGI Symbol;Acc:MGI:2685858]	0.00267754	0.743079	0.455908	mMC023747	11419.3	15883	11017.3	5712.01	5974.39	5548.82	12595.5	5742.41
Prune	prune homolog (Drosophila) [Source:MGI Symbol;Acc:MGI:1925152]	0.00268782	0.743079	0.690891	mMC013737	177.231	207.335	186.215	123.535	137.127	133.213	189.85	131.165
Pcdha1	protocadherin alpha 1 [Source:MGI Symbol;Acc:MGI:2150982]	0.00280342	0.743079	0.583518	mMR026124	92.0054	78.9396	69.6663	48.0413	45.3801	46.112	79.6851	46.4977
Mknk2	MAP kinase-interacting serine/threonine kinase 2 [Source:MGI Symbol;Acc:MGI:894279]	0.00281789	0.743079	1.36417	mMA032821	332.188	300.541	331.901	413.743	437.03	465.219	321.192	438.161
Rit1	Ras-like without CAAX 1 [Source:MGI Symbol;Acc:MGI:108053]	0.00287667	0.743079	0.590562	mMR027883	11352.5	10387.7	12266.1	6417.92	6119.41	7585.94	11309.4	6678.89
Chmp4c	charged multivesicular body protein 4C [Source:MGI Symbol;Acc:MGI:1913621]	0.00287815	0.743079	1.58741	mMR028946	56.1717	63.7224	51.4829	84.3173	92.7332	94.2735	56.9059	90.3332
Amn1	antagonist of mitotic exit network 1 [Source:MGI Symbol;Acc:MGI:2442933]	0.00296308	0.743079	2.44544	mMC023330	50.3608	39.9454	62.4368	114.711	118.383	135.262	50.0803	122.468
Prune	prune homolog (Drosophila) [Source:MGI Symbol;Acc:MGI:1925152]	0.00303592	0.743079	0.396722	mMC023051	373.832	359.508	277.132	150.006	106.545	145.509	333.957	132.488
Cep192	centrosomal protein 192 [Source:MGI Symbol;Acc:MGI:1918049]	0.00314181	0.743079	1.88843	mMA032672	324.44	346.193	369.144	670.617	756.664	550.27	346.112	653.609
Med6	mediator complex subunit 6 [Source:MGI Symbol;Acc:MGI:1917042]	0.00314855	0.743079	0.820465	mMC001761	2118.06	2317.78	2126.14	1756.94	1815.2	1807.59	2185.42	1793.06
		0.00320449	0.743079	1.28951	mMC025040	73.6043	77.9886	73.3906	92.1608	94.7063	103.496	74.9649	96.668
C1galt1	core 1 synthase, glycoprotein-N-acetylgalactosamine 3-beta-galactosyltransferase, 1 [Source:MGI Symbol;Acc:MGI:2151071]	0.00331466	0.743079	0.309152	mMR026710	2006.69	3000.66	1773.42	828.467	635.321	599.456	2202.09	680.783
Il20ra	interleukin 20 receptor, alpha [Source:MGI Symbol;Acc:MGI:3605069]	0.00334414	0.743079	0.283659	mMC003101	102.659	188.314	123.778	41.1782	31.5688	42.0132	133.754	37.9406
Hnrnph1	heterogeneous nuclear ribonucleoprotein H1 [Source:MGI Symbol;Acc:MGI:1891925]	0.00343897	0.743079	1.40043	mMR030913	10125.4	10376.3	9708.37	13983	12967.9	15449.6	10066.2	14097
Parp1	poly (ADP-ribose) polymerase family, member 1 [Source:MGI Symbol;Acc:MGI:1340806]	0.00346599	0.743079	2.57889	mMC008923	880.346	807.467	573.98	1695.17	1855.65	2224.65	741.694	1912.75
Adh7	alcohol dehydrogenase 7 (class IV), mu or sigma polypeptide [Source:MGI Symbol;Acc:MGI:87926]	0.00347512	0.743079	5.4444	mMC013339	51.3293	75.1353	78.8675	242.167	366.987	552.32	67.2516	366.144
		0.00348376	0.743079	0.393341	mMC004812	511.356	633.419	524.688	241.187	166.723	257.203	553.909	217.875
Anapc5	anaphase-promoting complex subunit 5 [Source:MGI Symbol;Acc:MGI:1929722]	0.00351711	0.743079	2.87928	mMA033440	2034.77	1652.98	2486.52	6740.49	4558.73	6496.67	2029.82	5844.43
Commd2	COMM domain containing 2 [Source:MGI Symbol;Acc:MGI:1098806]	0.00357558	0.743079	1.58494	mMC002347	102.659	94.1569	89.8213	137.261	170.669	147.559	95.3987	151.201
		0.00360099	0.743079	1.44686	mMC004991	46.4869	51.3583	56.9598	76.4739	73.0028	73.7793	51.4245	74.4039
		0.00364149	0.743079	1.91187	mMC012530	107.501	106.521	116.11	174.517	248.604	214.165	109.961	210.232
Cth	cystathionase (cystathionine gamma-lyase) [Source:MGI Symbol;Acc:MGI:1339968]	0.0037301	0.743079	0.589769	mMA035377	124.934	97.9612	113.92	65.6891	72.0162	60.458	111.715	65.8859
Rad51c	RAD51 homolog C [Source:MGI Symbol;Acc:MGI:2150020]	0.00377956	0.743079	2.69236	mMR027129	69.7304	75.1353	52.5783	137.261	202.237	193.671	65.0665	175.182
Pamr1	peptidase domain containing associated with muscle regeneration 1 [Source:MGI Symbol;Acc:MGI:2445082]	0.00380747	0.743079	0.195671	mMC016438	1265.8	805.565	827.013	291.189	145.019	149.608	944.77	184.864
		0.00385251	0.743079	2.6453	mMA034646	39.7076	38.0432	51.4829	87.2586	134.167	122.965	42.6846	112.914
Sspo	SCO-spondin [Source:MGI Symbol;Acc:MGI:2674311]	0.00387124	0.743079	1.76096	mMC008324	74.5728	60.8691	59.1506	101.965	125.289	114.768	64.5127	113.604
Tmc7	transmembrane channel-like gene family 7 [Source:MGI Symbol;Acc:MGI:2443317]	0.00389729	0.743079	1.77698	mMR031087	245.025	178.803	223.458	377.467	395.596	367.872	213.924	380.139
Nutf2	nuclear transport factor 2 [Source:MGI Symbol;Acc:MGI:1915301]	0.00396524	0.743079	2.76701	mMC018338	766.066	603.936	602.46	1349.08	2230.53	1962.32	653.223	1807.47
Car12	carbonic anyhydrase 12 [Source:MGI Symbol;Acc:MGI:1923709]	0.0039846	0.743079	2.33169	mMC004643	124.934	105.57	94.2028	209.813	311.742	240.807	107.505	250.668
Tshz3	teashirt zinc finger family member 3 [Source:MGI Symbol;Acc:MGI:2442819]	0.00402266	0.743079	0.370946	mMC015047	361.242	247.281	291.372	133.339	86.8141	114.768	296.355	109.932
Rala	v-ral simian leukemia viral oncogene homolog A (ras related) [Source:MGI Symbol;Acc:MGI:1927243]	0.00415998	0.743079	0.682086	mMC004146	1255.15	1346.73	1235.59	824.545	818.815	981.674	1278.25	871.878
Naa50	N(alpha)-acetyltransferase 50, NatE catalytic subunit [Source:MGI Symbol;Acc:MGI:1919367]	0.00420997	0.743079	1.64417	mMC011054	87.163	91.3037	111.729	153.928	150.938	170.102	96.1602	158.104
Npas2	neuronal PAS domain protein 2 [Source:MGI Symbol;Acc:MGI:109232]	0.00423697	0.743079	0.307678	mMR031093	49.3924	71.331	63.5321	22.55	21.7035	13.3213	60.717	18.6813
Nucb1	nucleobindin 1 [Source:MGI Symbol;Acc:MGI:97388]	0.00425948	0.743079	0.67831	mMC021525	8535.19	10073.8	10430.2	6816.96	6273.31	6544.84	9643.49	6541.27
Mrpl35	mitochondrial ribosomal protein L35 [Source:MGI Symbol;Acc:MGI:1913473]	0.00427601	0.743079	2.97465	mMR028087	119.123	112.227	154.449	286.287	382.771	495.961	127.338	378.788
Prkag2	protein kinase, AMP-activated, gamma 2 non-catalytic subunit [Source:MGI Symbol;Acc:MGI:1336153]	0.00430566	0.743079	0.783071	mMC006289	677.934	751.353	741.573	585.319	577.116	536.949	722.873	566.061
Cbfa2t2	core-binding factor, runt domain, alpha subunit 2, translocated to, 2 (human) [Source:MGI Symbol;Acc:MGI:1333833]	0.00432141	0.743079	0.825175	mMR029633	387.391	348.095	373.525	303.935	299.903	310.488	369.308	304.744
Nlrp6	NLR family, pyrin domain containing 6 [Source:MGI Symbol;Acc:MGI:2141990]	0.0043698	0.743079	2.04541	mMC007869	121.06	103.668	82.1536	187.263	219.995	214.165	101.024	206.635
Snapc1	small nuclear RNA activating complex, polypeptide 1 [Source:MGI Symbol;Acc:MGI:1922877]	0.00444736	0.743079	1.9866	mMC004956	609.172	456.518	486.349	971.61	1192.71	915.068	513.313	1019.75
Dst	dystonin [Source:MGI Symbol;Acc:MGI:104627]	0.00445641	0.743079	1.32323	mMR026581	82.3206	82.744	88.7259	102.946	115.423	117.842	84.547	111.875
Npepl1	aminopeptidase-like 1 [Source:MGI Symbol;Acc:MGI:2448523]	0.0044752	0.743079	1.47243	mMC020257	1196.07	1118.47	1009.94	1526.54	1777.72	1589.33	1105.5	1627.77
Dpy30	dpy-30, histone methyltransferase complex regulatory subunit [Source:MGI Symbol;Acc:MGI:1913560]	0.00448502	0.743079	1.48803	mMR027438	2425.07	2080.96	1934.44	3069.74	3233.83	3240.14	2137.21	3180.25
Eif4e3	eukaryotic translation initiation factor 4E member 3 [Source:MGI Symbol;Acc:MGI:1914142]	0.00450951	0.743079	0.488337	mMC025696	132.681	172.145	159.926	91.1804	70.0432	66.6063	154.007	75.2074
Rin3	Ras and Rab interactor 3 [Source:MGI Symbol;Acc:MGI:2385708]	0.00462747	0.743079	0.676461	mMC009548	361.242	349.997	380.097	279.424	228.874	232.61	363.568	245.94
Serpinb8	serine (or cysteine) peptidase inhibitor, clade B, member 8 [Source:MGI Symbol;Acc:MGI:894657]	0.00471169	0.743079	3.17146	mMC016209	270.205	223.504	230.03	593.163	668.863	1116.94	240.393	762.395
Fam76a	family with sequence similarity 76, member A [Source:MGI Symbol;Acc:MGI:2385211]	0.00475312	0.743079	0.56473	mMC025055	150.114	169.292	157.735	107.848	84.8411	78.9028	158.853	89.7091
Vps16	vacuolar protein sorting 16 (yeast) [Source:MGI Symbol;Acc:MGI:2136772]	0.00478313	0.743079	1.55122	mMC010928	1787.81	1932.59	1613.5	2936.4	2887.56	2454.19	1773.14	2750.54
		0.00478751	0.743079	1.43563	mMC019474	304.102	317.661	283.704	482.374	415.327	404.761	301.497	432.837
Erp29	endoplasmic reticulum protein 29 [Source:MGI Symbol;Acc:MGI:1914647]	0.00480165	0.743079	1.24421	mMA035438	69.7304	64.6734	63.5321	78.4347	85.8276	81.977	65.9246	82.0243
Tmigd3	transmembrane and immunoglobulin domain containing 3 [Source:MGI Symbol;Acc:MGI:5604098]	0.0048111	0.743079	0.225469	mMC017946	83.2891	72.2821	124.874	22.55	13.8113	27.6672	90.9277	20.5014
Myo1d	myosin ID [Source:MGI Symbol;Acc:MGI:107728]	0.00481289	0.743079	0.444697	mMC009768	11843.5	12690.3	14040.6	6081.63	4405.82	6926.03	12826.6	5703.97
Ccl6	chemokine (C-C motif) ligand 6 [Source:MGI Symbol;Acc:MGI:98263]	0.00490856	0.743079	0.114127	mMC015327	108.47	185.461	66.8183	13.7261	7.89219	18.4448	110.362	12.5952
Wdr33	WD repeat domain 33 [Source:MGI Symbol;Acc:MGI:1921570]	0.00491157	0.743079	0.535963	mMR027896	590.771	493.61	449.106	260.796	315.688	244.906	507.829	272.178
Ppp4r1	protein phosphatase 4, regulatory subunit 1 [Source:MGI Symbol;Acc:MGI:1917601]	0.00494281	0.743079	1.52551	mMC023924	6644.73	6015.58	5183.35	9415.11	8806.7	8870.93	5917.27	9026.84
Fabp4	fatty acid binding protein 4, adipocyte [Source:MGI Symbol;Acc:MGI:88038]	0.00500829	0.743079	0.195772	mMC026407	56.1717	84.6461	69.009	22.55	11.8383	9.22241	68.9726	13.5029
Smc3	structural maintenance of chromosomes 3 [Source:MGI Symbol;Acc:MGI:1339795]	0.00503583	0.743079	1.7328	mMR001358	625.637	690.484	714.189	1029.46	1119.7	1392.58	675.714	1170.88
Polk	polymerase (DNA directed), kappa [Source:MGI Symbol;Acc:MGI:1349767]	0.00504944	0.743079	1.76144	mMC017445	538.474	524.045	568.503	812.78	944.103	1142.55	543.361	957.098
		0.00523146	0.743079	1.4462	mMC008968	73.6043	67.5267	73.3906	111.77	91.7467	107.595	71.4507	103.332
Ubr1	ubiquitin protein ligase E3 component n-recognin 1 [Source:MGI Symbol;Acc:MGI:1277977]	0.00530928	0.743079	0.671256	mMR029396	161.736	140.76	179.643	104.906	106.545	110.669	159.918	107.346
Tdp1	tyrosyl-DNA phosphodiesterase 1 [Source:MGI Symbol;Acc:MGI:1920036]	0.00531633	0.743079	0.659665	mMC014975	283.764	287.226	276.036	170.596	216.049	175.226	282.303	186.225
Mknk2	MAP kinase-interacting serine/threonine kinase 2 [Source:MGI Symbol;Acc:MGI:894279]	0.00534182	0.743079	1.27308	mMC020472	1866.26	1663.44	1749.32	2250.1	2123.99	2344.54	1757.72	2237.71
Syde2	synapse defective 1, Rho GTPase, homolog 2 (C. elegans) [Source:MGI Symbol;Acc:MGI:3036264]	0.00534978	0.743079	0.422721	mMC023459	302.165	381.383	228.935	139.222	116.41	122.965	297.696	125.842
		0.00542198	0.743079	1.50798	mMC014745	184.011	208.287	168.689	300.993	284.119	259.252	186.293	280.927
BC055324	cDNA sequence BC055324 [Source:MGI Symbol;Acc:MGI:3590554]	0.00544739	0.743079	1.93579	mMC025664	481.333	486.953	427.199	805.917	1127.6	799.275	464.36	898.904
Slc30a1	solute carrier family 30 (zinc transporter), member 1 [Source:MGI Symbol;Acc:MGI:1345281]	0.00546782	0.743079	0.512544	mMC003684	1176.7	973.906	1345.13	692.187	557.386	537.974	1155.18	592.08
Snd1	staphylococcal nuclease and tudor domain containing 1 [Source:MGI Symbol;Acc:MGI:1929266]	0.00557098	0.743079	1.47668	mMC016481	1900.15	1827.02	1571.87	2391.28	2747.47	2674.5	1760.56	2599.77
Nagpa	N-acetylglucosamine-1-phosphodiester alpha-N-acetylglucosaminidase [Source:MGI Symbol;Acc:MGI:1351598]	0.00573206	0.743079	0.505003	mMC015295	843.544	836.95	1082.24	521.591	492.275	383.242	914.204	461.676
Bcl7a	B cell CLL/lymphoma 7A [Source:MGI Symbol;Acc:MGI:1924295]	0.00573354	0.743079	1.50127	mMR027088	295.386	252.987	233.316	366.682	400.529	401.687	259.305	389.288
		0.00582454	0.743079	1.88783	mMC006466	75.5413	97.9612	90.9167	138.241	180.534	181.374	87.6249	165.421
Slc9a3r2	solute carrier family 9 (sodium/hydrogen exchanger), member 3 regulator 2 [Source:MGI Symbol;Acc:MGI:1890662]	0.00586193	0.743079	0.372742	mMC011288	276.985	151.222	188.406	81.376	68.0701	73.7793	199.092	74.21
Ipo11	importin 11 [Source:MGI Symbol;Acc:MGI:2442377]	0.00592331	0.743079	1.46833	mMC009230	2039.61	2305.42	2098.75	3152.1	3503.15	2829.23	2144.96	3149.5
D3Ertd254e	DNA segment, Chr 3, ERATO Doi 254, expressed [Source:MGI Symbol;Acc:MGI:1098769]	0.00597232	0.743079	1.42025	mMC003640	435.815	505.023	501.685	700.03	724.109	624.05	479.75	681.365
Ppat	phosphoribosyl pyrophosphate amidotransferase [Source:MGI Symbol;Acc:MGI:2387203]	0.00604922	0.743079	1.84861	mMR028378	215.971	179.754	166.498	408.841	320.62	311.512	186.278	344.355
Oaz1	ornithine decarboxylase antizyme 1 [Source:MGI Symbol;Acc:MGI:109433]	0.00604984	0.743079	1.41979	mMC022932	13838.6	16252.1	13403.1	20749.9	21393.8	19434.7	14445.6	20509.7
Selplg	selectin, platelet (p-selectin) ligand [Source:MGI Symbol;Acc:MGI:106689]	0.0061047	0.743079	0.25371	mMC006642	102.659	62.7713	71.1998	29.413	17.7574	14.346	77.1279	19.5682
Pdgfrl	platelet-derived growth factor receptor-like [Source:MGI Symbol;Acc:MGI:1916047]	0.00612955	0.743079	0.250252	mMR029110	1065.33	1231.65	2333.16	440.215	352.189	309.463	1452.02	363.371
Large	like-glycosyltransferase [Source:MGI Symbol;Acc:MGI:1342270]	0.0061433	0.743079	0.463662	mMC016362	7019.53	6971.42	9605.4	4362.93	3114.46	3448.16	7775.26	3605.09
Tmbim6	transmembrane BAX inhibitor motif containing 6 [Source:MGI Symbol;Acc:MGI:99682]	0.00621905	0.743079	1.819	mMA034832	67.7934	58.0159	51.4829	100.985	125.289	96.3229	58.7218	106.815
Amdhd1	amidohydrolase domain containing 1 [Source:MGI Symbol;Acc:MGI:1919011]	0.00622404	0.743079	1.30941	mMC012274	71.6674	70.3799	75.5813	88.2391	93.7198	103.496	72.5095	94.9449
Fxyd2	FXYD domain-containing ion transport regulator 2 [Source:MGI Symbol;Acc:MGI:1195260]	0.00622639	0.743079	1.63231	mMA032763	64.888	59.918	50.3876	100.004	84.8411	100.422	58.0785	94.802
Tagap1	T cell activation GTPase activating protein 1 [Source:MGI Symbol;Acc:MGI:1919786]	0.00641564	0.743079	2.02956	mMR027426	520.073	475.54	339.568	836.31	955.942	878.178	437.918	888.779
Cul4b	cullin 4B [Source:MGI Symbol;Acc:MGI:1919834]	0.00643642	0.743079	1.41292	mMC021673	723.453	651.49	720.761	995.141	889.845	1082.1	697.755	985.874
Gstp1	glutathione S-transferase, pi 1 [Source:MGI Symbol;Acc:MGI:95865]	0.00643824	0.743079	1.67856	mMR026924	6795.81	8603.47	9040.19	12447.6	13800.5	14551.9	8085.32	13571.7
Snapc2	small nuclear RNA activating complex, polypeptide 2 [Source:MGI Symbol;Acc:MGI:1914861]	0.00644602	0.743079	1.19634	mMC013706	687.619	673.365	667.087	761.797	854.33	812.597	675.969	808.686
Ms4a6d	membrane-spanning 4-domains, subfamily A, member 6D [Source:MGI Symbol;Acc:MGI:1916024]	0.00653977	0.743079	0.284642	mMC017690	147.209	204.482	273.845	46.0804	52.2858	78.9028	202.006	57.4995
Clcn3	chloride channel, voltage-sensitive 3 [Source:MGI Symbol;Acc:MGI:103555]	0.0065441	0.743079	1.51154	mMC006091	743.791	622.957	567.408	970.63	958.901	975.526	640.621	968.327
Clec11a	C-type lectin domain family 11, member a [Source:MGI Symbol;Acc:MGI:1298219]	0.00656659	0.743079	0.23879	mMC016632	473.586	442.252	927.788	127.456	182.507	113.743	579.214	138.311
Dennd5a	DENN/MADD domain containing 5A [Source:MGI Symbol;Acc:MGI:1201681]	0.00656932	0.743079	0.494981	mMC001923	2025.09	2769.54	2127.23	1343.19	969.753	1110.79	2285.01	1131.04
Amn1	antagonist of mitotic exit network 1 [Source:MGI Symbol;Acc:MGI:2442933]	0.00664867	0.743079	2.51273	mMR026493	27.1174	29.4835	42.7199	65.6891	94.7063	87.1005	32.4453	81.5263
Slc35d3	solute carrier family 35, member D3 [Source:MGI Symbol;Acc:MGI:1923407]	0.00669132	0.743079	0.280452	mMC009632	50.3608	104.619	59.1506	23.5304	16.7709	17.4201	67.7986	19.0142
Tmem45a	transmembrane protein 45a [Source:MGI Symbol;Acc:MGI:1913122]	0.00673344	0.743079	0.757945	mMC025267	9072.7	9312.02	9609.78	7106.19	6455.81	7705.83	9328.92	7070.81
Col4a6	collagen, type IV, alpha 6 [Source:MGI Symbol;Acc:MGI:2152695]	0.00680699	0.743079	1.85596	mMC011329	1894.34	1497	2242.25	3253.08	3534.72	3535.26	1852.63	3438.4
L3mbtl1	l(3)mbt-like (Drosophila) [Source:MGI Symbol;Acc:MGI:2676663]	0.00682514	0.743079	1.30009	mMA035328	72.6358	77.0375	85.4398	98.0434	104.572	102.471	78.1936	101.659
Itih2	inter-alpha trypsin inhibitor, heavy chain 2 [Source:MGI Symbol;Acc:MGI:96619]	0.0069491	0.743079	0.500171	mMC005793	1506.95	1813.71	2275.11	874.547	850.384	1046.23	1838.89	919.762
Foxo1	forkhead box O1 [Source:MGI Symbol;Acc:MGI:1890077]	0.00718116	0.743079	0.487896	mMR029123	619.826	568.746	890.545	335.309	350.216	310.488	679.644	331.595
		0.00720586	0.743079	0.56352	mMC004153	1076.95	791.298	1008.85	541.2	477.478	595.358	950.867	535.833
Cdk5	cyclin-dependent kinase 5 [Source:MGI Symbol;Acc:MGI:101765]	0.00722856	0.743079	1.42416	mMC003443	427.099	385.187	419.531	515.708	621.51	622	410.193	584.181
Epdr1	ependymin related protein 1 (zebrafish) [Source:MGI Symbol;Acc:MGI:2145369]	0.0074593	0.743079	0.547723	mMC014518	6304.79	7056.06	7140.79	4647.26	3541.62	3171.48	6823.28	3737.26
Bfar	bifunctional apoptosis regulator [Source:MGI Symbol;Acc:MGI:1914368]	0.00750447	0.743079	0.542303	mMC025062	4275.83	3663.56	3233.57	2400.1	1768.84	1902.89	3700	2006.52
Mrps33	mitochondrial ribosomal protein S33 [Source:MGI Symbol;Acc:MGI:1338046]	0.00751369	0.743079	1.49693	mMC024239	2791.15	2685.85	2864.42	3592.31	4266.72	4699.33	2779.51	4160.71
Ormdl3	ORM1-like 3 (S. cerevisiae) [Source:MGI Symbol;Acc:MGI:1913862]	0.00754884	0.743079	0.490031	mMC021965	4239.03	4051.6	3949.95	1966.75	1577.45	2573.05	4078.45	1998.56
		0.00774256	0.743079	1.35142	mMC023183	231.466	216.846	244.27	285.306	339.364	312.537	230.588	311.621
Thbs2	thrombospondin 2 [Source:MGI Symbol;Acc:MGI:98738]	0.00779622	0.743079	0.333141	mMR027485	11415.4	16373.8	23168.4	5840.45	4560.7	6010.96	16299.7	5430.09
Dock9	dedicator of cytokinesis 9 [Source:MGI Symbol;Acc:MGI:106321]	0.00788155	0.743079	1.29407	mMA031666	419.351	409.915	360.381	490.217	517.925	528.751	395.68	512.038
Cd68	CD68 antigen [Source:MGI Symbol;Acc:MGI:88342]	0.00806219	0.743079	0.405359	mMR029318	1028.52	873.091	1369.23	540.219	439.003	345.328	1071.31	434.267
		0.00823221	0.743079	1.52417	mMR027836	123.965	109.374	140.209	171.576	195.332	200.844	123.879	188.812
Fbxl17	F-box and leucine-rich repeat protein 17 [Source:MGI Symbol;Acc:MGI:1354704]	0.00830932	0.743079	0.671282	mMC010954	947.171	983.417	779.912	568.652	593.887	650.692	898.953	603.451
Cpne7	copine VII [Source:MGI Symbol;Acc:MGI:2142747]	0.0083238	0.743079	2.29674	mMC002411	206.286	266.302	211.409	397.076	668.863	529.776	226.459	520.117
1700122O11Rik	RIKEN cDNA 1700122O11 gene [Source:MGI Symbol;Acc:MGI:1923901]	0.00832693	0.743079	1.33031	mMC017640	52.2978	48.5051	52.5783	71.5717	61.1645	71.7298	51.0927	67.9694
Wtap	Wilms tumour 1-associating protein [Source:MGI Symbol;Acc:MGI:1926395]	0.00841637	0.743079	1.69074	mMR030362	56.1717	51.3583	50.3876	72.5521	101.612	95.2982	52.5796	88.8983
Sowahc	sosondowah ankyrin repeat domain family member C [Source:MGI Symbol;Acc:MGI:3606051]	0.00844372	0.743079	0.694225	mMR027647	522.009	557.333	555.359	419.626	391.65	328.933	544.656	378.114
Ncaph2	non-SMC condensin II complex, subunit H2 [Source:MGI Symbol;Acc:MGI:1289164]	0.00850665	0.743079	1.62392	mMA032922	3125.28	2666.83	2408.74	3883.5	4841.86	4572.26	2717.85	4413.56
Svop	SV2 related protein [Source:MGI Symbol;Acc:MGI:1915916]	0.00851317	0.743079	2.05744	mMC014624	81.3521	60.8691	59.1506	115.691	131.208	168.053	66.4113	136.637
Lhx8	LIM homeobox protein 8 [Source:MGI Symbol;Acc:MGI:1096343]	0.00862955	0.743079	0.146829	mMR028305	120.091	112.227	123.778	36.2761	15.7844	9.22241	118.6	17.414
Wnk1	WNK lysine deficient protein kinase 1 [Source:MGI Symbol;Acc:MGI:2442092]	0.00871201	0.743079	1.60326	mMA032668	58.1087	64.6734	75.5813	93.1413	110.491	113.743	65.7346	105.39
Ms4a6d	membrane-spanning 4-domains, subfamily A, member 6D [Source:MGI Symbol;Acc:MGI:1916024]	0.00873384	0.743079	0.265346	mMC022890	443.563	343.34	758.004	98.0434	134.167	163.954	486.912	129.2
Impact	impact, RWD domain protein [Source:MGI Symbol;Acc:MGI:1098233]	0.00881743	0.743079	1.78539	mMC025116	283.764	374.725	330.805	498.061	588.955	682.458	327.653	584.988
C1qtnf5	C1q and tumor necrosis factor related protein 5 [Source:MGI Symbol;Acc:MGI:2385958]	0.0088368	0.743079	0.236211	mMC019364	215.971	138.858	294.658	66.6695	53.2723	32.7908	206.741	48.8345
Ap2a1	adaptor-related protein complex 2, alpha 1 subunit [Source:MGI Symbol;Acc:MGI:101921]	0.00884459	0.743079	0.590087	mMC020201	246.962	284.373	198.264	139.222	151.925	135.262	240.577	141.961
Fig4	FIG4 phosphoinositide 5-phosphatase [Source:MGI Symbol;Acc:MGI:2143585]	0.00889456	0.743079	0.611565	mMC007703	782.53	699.044	599.174	470.608	371.92	428.33	689.476	421.66
Pard6g	par-6 family cell polarity regulator gamma [Source:MGI Symbol;Acc:MGI:2135606]	0.00891739	0.743079	1.28515	mMC013128	1121.5	1127.03	1129.34	1603.01	1404.81	1345.45	1125.95	1447.02
Sucla2	succinate-Coenzyme A ligase, ADP-forming, beta subunit [Source:MGI Symbol;Acc:MGI:1306775]	0.0090009	0.743079	0.622814	mMC021149	1903.06	2128.52	2459.13	1229.46	1528.13	1280.89	2151.64	1340.07
Clec11a	C-type lectin domain family 11, member a [Source:MGI Symbol;Acc:MGI:1298219]	0.00908582	0.743079	0.216819	mMR029236	1138.93	961.542	2087.8	187.263	395.596	314.587	1317.4	285.637
Mfap4	microfibrillar-associated protein 4 [Source:MGI Symbol;Acc:MGI:1342276]	0.00910152	0.743079	0.14848	mMC016381	785.435	1777.57	2912.62	190.204	296.944	235.684	1596.15	236.996
		0.0091026	0.743079	0.523708	mMC015106	176.263	199.727	271.655	113.73	101.612	118.867	212.262	111.163
Helq	helicase, POLQ-like [Source:MGI Symbol;Acc:MGI:2176740]	0.00910846	0.743079	1.73087	mMC004647	108.47	97.9612	82.1536	157.85	194.345	147.559	95.5718	165.422
Siah2	seven in absentia 2 [Source:MGI Symbol;Acc:MGI:108062]	0.00918537	0.743079	0.525867	mMC015101	422.256	459.372	406.387	175.498	238.739	273.598	428.772	225.477
Ccdc34	coiled-coil domain containing 34 [Source:MGI Symbol;Acc:MGI:1915451]	0.00931004	0.743079	1.9982	mMR030767	400.95	313.856	508.257	764.739	879.979	758.287	399.915	799.11
Nfatc4	nuclear factor of activated T cells, cytoplasmic, calcineurin dependent 4 [Source:MGI Symbol;Acc:MGI:1920431]	0.00933431	0.743079	0.430303	mMC005487	2813.43	3391.55	4988.37	1763.8	1455.12	1477.63	3624.08	1559.45
Vps16	vacuolar protein sorting 16 (yeast) [Source:MGI Symbol;Acc:MGI:2136772]	0.00945619	0.743079	1.48362	mMA032139	1620.26	1273.5	1269.55	1956.95	2055.92	2126.28	1378.51	2045.2
Stk25	serine/threonine kinase 25 (yeast) [Source:MGI Symbol;Acc:MGI:1891699]	0.00949534	0.743079	0.617017	mMA034835	3112.69	3035.85	3068.16	1588.3	1889.19	2269.74	3072.07	1895.52
Krtcap2	keratinocyte associated protein 2 [Source:MGI Symbol;Acc:MGI:1913309]	0.00951098	0.743079	0.774458	mMC003318	24814.3	28493.4	28117.4	22033.3	21242.8	19729.8	27089.9	20980
Prl2c5	prolactin family 2, subfamily c, member 5 [Source:MGI Symbol;Acc:MGI:1858413]	0.0095162	0.743079	20.623	mMR030918	78.4467	165.488	29.5753	1139.26	3381.8	874.079	72.6814	1498.91
Elac2	elaC ribonuclease Z 2 [Source:MGI Symbol;Acc:MGI:1890496]	0.00955645	0.743079	1.44304	mMC016775	146.24	147.417	124.874	215.696	209.143	179.325	139.111	200.743
Nxt1	NTF2-related export protein 1 [Source:MGI Symbol;Acc:MGI:1929619]	0.00957535	0.743079	2.05145	mMA035406	92.0054	79.8907	84.3444	131.378	188.426	216.214	85.2685	174.924
		0.0095939	0.743079	1.44973	mMC004354	108.47	101.766	88.7259	144.124	131.208	157.806	99.3085	143.97
		0.00965141	0.743079	2.00224	mMR028316	77.4782	83.695	64.6275	118.633	184.48	153.707	74.834	149.836
		0.00970941	0.743079	2.02638	mMC008988	39.7076	41.8475	42.7199	87.2586	106.545	63.5321	41.4055	83.9031
		0.00974363	0.743079	1.75969	mMC002575	359.305	291.982	303.421	483.354	525.817	682.458	316.924	557.689
Sparc	secreted acidic cysteine rich glycoprotein [Source:MGI Symbol;Acc:MGI:98373]	0.00982962	0.743079	0.580611	mMC010599	18814.6	13957.1	15603.7	10874	8511.73	8664.96	16001.9	9290.9
Zbtb46	zinc finger and BTB domain containing 46 [Source:MGI Symbol;Acc:MGI:1919397]	0.00983324	0.743079	0.704926	mMR029519	256.647	268.205	271.655	216.676	175.601	172.152	265.424	187.104
Zfyve28	zinc finger, FYVE domain containing 28 [Source:MGI Symbol;Acc:MGI:2684992]	0.00986185	0.743079	0.557941	mMC002075	81.3521	85.5972	77.7721	55.8848	36.5014	46.112	81.5112	45.4784
Ptrf	polymerase I and transcript release factor [Source:MGI Symbol;Acc:MGI:1277968]	0.00986318	0.743079	0.533827	mMC019351	743.791	589.67	778.816	447.078	310.755	374.02	699.034	373.163
Mfap5	microfibrillar associated protein 5 [Source:MGI Symbol;Acc:MGI:1354387]	0.00991585	0.743079	0.36149	mMC009066	6205.04	6494.92	6652.25	2957.97	1503.46	2847.67	6448.06	2330.91
Avpr1a	arginine vasopressin receptor 1A [Source:MGI Symbol;Acc:MGI:1859216]	0.0099462	0.743079	0.151118	mMC009611	3200.82	4341.68	1666.08	709.834	442.949	254.129	2850.17	430.713
		0.0100044	0.743079	1.96305	mMC011889	76.5097	58.967	48.1968	105.887	119.369	130.138	60.1332	118.045
Ap1s2	adaptor-related protein complex 1, sigma 2 subunit [Source:MGI Symbol;Acc:MGI:1889383]	0.0100438	0.743079	0.369886	mMC020886	174.326	211.14	178.547	104.906	55.2453	57.3839	187.31	69.2834
Wwox	WW domain-containing oxidoreductase [Source:MGI Symbol;Acc:MGI:1931237]	0.010079	0.743079	1.43574	mMC012134	183.042	196.874	176.356	252.952	242.685	306.389	185.229	265.941
Zfp512	zinc finger protein 512 [Source:MGI Symbol;Acc:MGI:1917345]	0.0100941	0.743079	1.57616	mMC010108	1030.46	901.624	1021.99	1310.84	1777.72	1595.48	982.882	1549.18
Aptx	aprataxin [Source:MGI Symbol;Acc:MGI:1913658]	0.0101837	0.743079	0.720673	mMA034012	1097.29	1016.7	934.361	786.308	657.025	755.213	1013.93	730.715
Psma3	proteasome (prosome, macropain) subunit, alpha type 3 [Source:MGI Symbol;Acc:MGI:104883]	0.0102103	0.743079	1.10764	mMC019774	11844.5	12132	12593.6	13189.8	13492.7	13818.2	12186.1	13497.8
Crebbp	CREB binding protein [Source:MGI Symbol;Acc:MGI:1098280]	0.010221	0.743079	0.849465	mMC025457	820.301	876.896	783.198	690.226	693.526	721.397	825.906	701.578
Thbs2	thrombospondin 2 [Source:MGI Symbol;Acc:MGI:98738]	0.0103718	0.743079	0.319435	mMC024089	16495.1	21146.3	31746.4	9655.32	6736.97	5548.82	22289.2	7119.95
Trip4	thyroid hormone receptor interactor 4 [Source:MGI Symbol;Acc:MGI:1928469]	0.0103825	0.743079	0.607286	mMC020200	563.654	738.989	589.315	432.372	374.879	339.18	626.132	380.241
Snx12	sorting nexin 12 [Source:MGI Symbol;Acc:MGI:1919331]	0.0104242	0.743079	0.922034	mMR028533	3147.55	3107.18	3254.38	2975.62	2861.91	2929.65	3169.1	2922.02
Cygb	cytoglobin [Source:MGI Symbol;Acc:MGI:2149481]	0.0104631	0.743079	0.1655	mMC001874	2122.9	4424.42	8302.99	739.247	728.055	656.84	4272.42	707.084
Pttg1	pituitary tumor-transforming gene 1 [Source:MGI Symbol;Acc:MGI:1353578]	0.0104823	0.743079	1.27065	mMC017933	2371.8	2428.11	2386.84	2850.12	3374.9	2931.7	2395.46	3043.79
Dact1	dishevelled-binding antagonist of beta-catenin 1 [Source:MGI Symbol;Acc:MGI:1891740]	0.0104917	0.743079	0.445309	mMC016987	388.36	324.318	542.214	203.93	196.318	150.633	408.751	182.021
Prrc2c	proline-rich coiled-coil 2C [Source:MGI Symbol;Acc:MGI:1913754]	0.0105454	0.743079	1.37629	mMA033356	196.601	180.705	165.403	245.109	272.281	229.535	180.454	248.356
Gm12844	predicted gene 12844 [Source:MGI Symbol;Acc:MGI:3651053]	0.0105658	0.743079	0.669785	mMC025757	29122.1	24672	22076.3	18097.8	16369.4	16088	25125.7	16828.8
Dusp27	dual specificity phosphatase 27 (putative) [Source:MGI Symbol;Acc:MGI:2685055]	0.010619	0.743079	0.175949	mMC021452	66.825	142.662	201.55	32.3543	19.7305	16.3954	124.321	21.8741
Pcdhgb1	protocadherin gamma subfamily B, 1 [Source:MGI Symbol;Acc:MGI:1935169]	0.0106219	0.743079	0.677585	mMC022981	74.5728	60.8691	65.7229	48.0413	48.3397	39.9638	66.8187	45.2753
Spsb1	splA/ryanodine receptor domain and SOCS box containing 1 [Source:MGI Symbol;Acc:MGI:1921896]	0.0106601	0.743079	0.532992	mMC007974	10686.2	8913.52	7850.6	4200.18	5962.55	4521.03	9076.64	4837.78
Pla2g4e	phospholipase A2, group IVE [Source:MGI Symbol;Acc:MGI:1919144]	0.0107151	0.743079	1.79749	mMC025548	112.343	74.1842	79.9629	164.713	153.898	152.682	87.3472	157.006
Nosip	nitric oxide synthase interacting protein [Source:MGI Symbol;Acc:MGI:1913644]	0.0107503	0.743079	0.662898	mMC002794	1669.66	2077.16	2056.03	1415.75	1163.11	1261.42	1924.75	1275.92
Myo1d	myosin ID [Source:MGI Symbol;Acc:MGI:107728]	0.0108096	0.743079	0.411632	mMR027548	1049.83	982.466	967.222	607.869	332.459	344.303	999.204	411.304
Syne4	spectrin repeat containing, nuclear envelope family member 4 [Source:MGI Symbol;Acc:MGI:2141950]	0.0108332	0.743079	1.65802	mMC013558	138.492	117.934	118.301	179.419	196.318	250.03	124.552	206.51
Tmem109	transmembrane protein 109 [Source:MGI Symbol;Acc:MGI:1915789]	0.0108347	0.743079	1.57922	mMC006722	1505.98	1172.68	1467.81	2433.44	2144.7	1956.18	1373.69	2169.36
Fmo9	flavin containing monooxygenase 9 [Source:MGI Symbol;Acc:MGI:3606068]	0.010858	0.743079	1.32379	mMC012775	84.2576	76.0864	79.9629	117.652	97.6659	103.496	80.0328	105.947
		0.0108751	0.743079	0.552131	mMC018496	954.919	795.103	748.146	456.882	553.44	378.119	828.181	457.265
Arhgef12	Rho guanine nucleotide exchange factor (GEF) 12 [Source:MGI Symbol;Acc:MGI:1916882]	0.010898	0.743079	0.687663	mMC009054	1857.54	1694.82	1449.19	1135.34	1064.46	1227.6	1658.55	1140.53
Plcb4	phospholipase C, beta 4 [Source:MGI Symbol;Acc:MGI:107464]	0.0109343	0.743079	1.63167	mMC025631	64.888	68.4778	60.246	95.1021	94.7063	129.114	64.4487	105.159
Wdr54	WD repeat domain 54 [Source:MGI Symbol;Acc:MGI:1922909]	0.0109448	0.743079	2.16124	mMC024446	137.524	100.814	111.729	204.911	229.86	332.007	115.706	250.068
		0.0109449	0.743079	2.29783	mMC010144	36.8022	59.918	35.0522	86.2782	110.491	98.3723	42.5973	97.8813
Tas2r116	taste receptor, type 2, member 116 [Source:MGI Symbol;Acc:MGI:1890258]	0.0109658	0.743079	1.7206	mMC001884	88.1315	80.8418	81.0582	133.339	122.329	180.349	83.2763	143.285
Zfp202	zinc finger protein 202 [Source:MGI Symbol;Acc:MGI:1933401]	0.0110017	0.743079	1.56197	mMC011895	210.16	237.77	213.599	286.287	378.825	375.045	220.175	343.907
Pdgfb	platelet derived growth factor, B polypeptide [Source:MGI Symbol;Acc:MGI:97528]	0.011016	0.743079	0.386757	mMC001560	282.795	315.759	212.504	117.652	128.248	72.7545	266.726	103.158
Srpx2	sushi-repeat-containing protein, X-linked 2 [Source:MGI Symbol;Acc:MGI:1916042]	0.0110731	0.743079	0.071211	mMC009280	1342.31	2742.91	6402.51	290.209	307.795	95.2982	2867.29	204.183
Heg1	heart development protein with EGF-like domains 1 [Source:MGI Symbol;Acc:MGI:1924696]	0.0111949	0.743079	2.63474	mMC023228	220.813	191.167	220.172	717.678	651.106	363.773	210.249	553.95
Aoc2	amine oxidase, copper containing 2 (retina-specific) [Source:MGI Symbol;Acc:MGI:2668431]	0.0112891	0.743079	1.90685	mMC011872	82.3206	89.4015	73.3906	144.124	201.251	129.114	81.4388	155.292
Tspan15	tetraspanin 15 [Source:MGI Symbol;Acc:MGI:1917673]	0.0113714	0.743079	1.98755	mMC008741	46.4869	37.0921	32.8615	93.1413	62.151	76.8534	38.409	76.3398
Prelid2	PRELI domain containing 2 [Source:MGI Symbol;Acc:MGI:1924869]	0.0113738	0.743079	2.34921	mMC025720	92.0054	123.64	78.8675	184.322	213.089	296.142	96.4474	226.575
Pdlim1	PDZ and LIM domain 1 (elfin) [Source:MGI Symbol;Acc:MGI:1860611]	0.0113841	0.743079	0.112184	mMR029623	7577.37	5359.34	6643.49	1903.02	434.071	461.12	6461.63	724.891
Exoc3l4	exocyst complex component 3-like 4 [Source:MGI Symbol;Acc:MGI:1921363]	0.011411	0.743079	0.442495	mMC002797	565.591	496.464	811.678	328.445	223.941	268.475	610.836	270.292
Smc3	structural maintenance of chromosomes 3 [Source:MGI Symbol;Acc:MGI:1339795]	0.0114188	0.743079	1.66254	mMC022459	4022.09	3310.71	3777.97	5065.9	7065.48	6458.76	3691.56	6137.37
Hoxd3	homeobox D3 [Source:MGI Symbol;Acc:MGI:96207]	0.0114292	0.743079	1.63349	mMC019388	976.226	1025.26	917.93	1386.33	1475.84	1957.2	972.147	1587.99
		0.011462	0.743079	0.73921	mMC013364	51.3293	51.3583	62.4368	42.1587	39.461	39.9638	54.8032	40.5111
Igfbp6	insulin-like growth factor binding protein 6 [Source:MGI Symbol;Acc:MGI:96441]	0.0114925	0.743079	0.290803	mMC021748	1439.16	1704.34	2630.01	814.741	492.275	395.539	1861.55	541.343
		0.0115482	0.743079	1.60898	mMC009780	289.575	265.351	240.984	489.237	356.135	442.676	264.56	425.67
Phf6	PHD finger protein 6 [Source:MGI Symbol;Acc:MGI:1918248]	0.0116356	0.743079	1.88147	mMA031551	553.001	605.838	708.712	1084.36	983.564	1482.76	619.228	1165.06
Numb	numb gene homolog (Drosophila) [Source:MGI Symbol;Acc:MGI:107423]	0.0116927	0.743079	0.841439	mMA034267	313.787	282.471	311.088	253.932	245.644	263.351	302.109	254.207
Ercc5	excision repair cross-complementing rodent repair deficiency, complementation group 5 [Source:MGI Symbol;Acc:MGI:103582]	0.0117187	0.743079	1.52743	mMA033405	1814.93	1599.72	1772.33	2228.53	3002.98	2740.08	1726.43	2637.01
Tns3	tensin 3 [Source:MGI Symbol;Acc:MGI:2443012]	0.0117621	0.743079	0.441559	mMC025254	7360.43	6999.95	4980.7	3710.94	2471.24	2409.1	6354.72	2805.98
Prl2c2	prolactin family 2, subfamily c, member 2 [Source:MGI Symbol;Acc:MGI:97618]	0.0117699	0.743079	33.0802	mMR030027	283.764	658.147	66.8183	5365.92	18212.2	4622.48	231.949	7672.92
Lrp10	low-density lipoprotein receptor-related protein 10 [Source:MGI Symbol;Acc:MGI:1929480]	0.011798	0.743079	0.54876	mMC015765	25517.5	25818	19630.3	13380	15072.1	10597.6	23472.7	12880.9
Igf2r	insulin-like growth factor 2 receptor [Source:MGI Symbol;Acc:MGI:96435]	0.0119158	0.743079	0.673909	mMC007221	3216.31	3735.84	3607.09	2451.09	2039.14	2654	3512.65	2367.21
Taf6	TAF6 RNA polymerase II, TATA box binding protein (TBP)-associated factor [Source:MGI Symbol;Acc:MGI:109129]	0.0119413	0.743079	1.30511	mMC011176	461.964	427.035	385.574	519.63	572.184	568.715	423.701	552.978
Ppm1a	protein phosphatase 1A, magnesium dependent, alpha isoform [Source:MGI Symbol;Acc:MGI:99878]	0.0119579	0.743079	1.59089	mMC022215	1551.5	1609.23	1174.25	2203.04	2185.15	2452.14	1431.23	2276.93
Hdgfrp2	hepatoma-derived growth factor, related protein 2 [Source:MGI Symbol;Acc:MGI:1194492]	0.0119637	0.743079	1.54934	mMC013760	3891.34	4590.86	5022.33	7137.56	6107.57	7654.6	4476.78	6936.07
Cltc	clathrin, heavy polypeptide (Hc) [Source:MGI Symbol;Acc:MGI:2388633]	0.012166	0.743079	0.672205	mMA033197	4592.52	4339.78	4827.35	3046.21	2669.53	3593.66	4582.22	3080.19
Nupr1	nuclear protein transcription regulator 1 [Source:MGI Symbol;Acc:MGI:1891834]	0.0121879	0.743079	0.602911	mMC013468	63424.6	56361.9	46669.8	35965.3	35555.3	28592.5	55050.3	33190.5
		0.0123212	0.743079	1.546	mMR028716	92.0054	91.3037	72.2952	128.437	146.992	118.867	84.6844	130.923
Clec4n	C-type lectin domain family 4, member n [Source:MGI Symbol;Acc:MGI:1861231]	0.01233	0.743079	0.104226	mMC024925	317.661	582.061	474.3	81.376	70.0432	17.4201	444.285	46.3061
Cd52	CD52 antigen [Source:MGI Symbol;Acc:MGI:1346088]	0.012338	0.743079	0.374569	mMC026451	121.06	90.3526	74.486	35.2956	47.3531	25.6178	93.3981	34.9841
		0.0123506	0.743079	1.64717	mMC004604	2285.61	2303.52	2403.27	3161.9	3808.97	4695.23	2330.23	3838.29
Csnk1a1	casein kinase 1, alpha 1 [Source:MGI Symbol;Acc:MGI:1934950]	0.0123916	0.743079	1.40661	mMA033229	254.71	248.232	222.362	385.311	306.809	330.982	241.354	339.491
Cenpt	centromere protein T [Source:MGI Symbol;Acc:MGI:2443939]	0.0124462	0.743079	0.551611	mMC006439	322.503	428.937	286.99	209.813	165.736	191.621	341.139	188.176
Dido1	death inducer-obliterator 1 [Source:MGI Symbol;Acc:MGI:1344352]	0.0125251	0.743079	1.33302	mMA034789	54.2348	55.1626	51.4829	65.6891	80.895	68.6557	53.6038	71.4546
Npc1	Niemann-Pick type C1 [Source:MGI Symbol;Acc:MGI:1097712]	0.0125359	0.743079	0.530553	mMR028103	167.547	251.085	255.224	123.535	105.558	122.965	220.61	117.045
Zeb2	zinc finger E-box binding homeobox 2 [Source:MGI Symbol;Acc:MGI:1344407]	0.0125473	0.743079	0.485034	mMC015521	488.113	635.321	817.155	323.543	339.364	263.351	632.809	306.934
Krt12	keratin 12 [Source:MGI Symbol;Acc:MGI:96687]	0.0125502	0.743079	1.20857	mMR027817	106.533	116.032	105.157	128.437	127.262	140.386	109.135	131.897
Zcchc3	zinc finger, CCHC domain containing 3 [Source:MGI Symbol;Acc:MGI:1915167]	0.0125545	0.743079	0.1834	mMC025282	165.61	151.222	201.55	64.7087	27.6227	17.4201	171.538	31.4601
Pomt2	protein-O-mannosyltransferase 2 [Source:MGI Symbol;Acc:MGI:2444430]	0.0125638	0.743079	0.44362	mMR029270	1406.23	1697.68	955.173	672.578	504.114	587.16	1316.23	583.905
Ccp110	centriolar coiled coil protein 110 [Source:MGI Symbol;Acc:MGI:2141942]	0.0127141	0.743079	2.22968	mMC021711	444.531	400.405	290.276	715.717	1089.12	734.718	372.453	830.449
Inpp5f	inositol polyphosphate-5-phosphatase F [Source:MGI Symbol;Acc:MGI:2141867]	0.0128141	0.743079	1.16635	mMA032758	200.475	187.363	198.264	216.676	239.725	227.486	195.282	227.768
Zfp772	zinc finger protein 772 [Source:MGI Symbol;Acc:MGI:2385265]	0.012964	0.743079	0.758085	mMC001691	54.2348	64.6734	65.7229	46.0804	48.3397	45.0873	61.3159	46.4827
		0.0129789	0.743079	2.09735	mMC013858	332.188	569.697	451.297	831.408	885.898	1069.8	440.383	923.635
		0.0129984	0.743079	1.3363	mMC023835	89.1	108.423	95.2982	128.437	139.1	122.965	97.281	129.997
Rfx7	regulatory factor X, 7 [Source:MGI Symbol;Acc:MGI:2442675]	0.0130043	0.743079	1.49713	mMC003306	404.824	468.882	496.208	648.067	620.524	785.954	454.986	681.175
Aptx	aprataxin [Source:MGI Symbol;Acc:MGI:1913658]	0.0130699	0.743079	0.546944	mMC022413	839.67	804.614	806.201	575.515	438.017	353.526	816.67	446.673
Plek	pleckstrin [Source:MGI Symbol;Acc:MGI:1860485]	0.0131491	0.743079	0.325997	mMR026569	93.9423	82.744	177.452	41.1782	40.4475	28.6919	111.316	36.2888
Clec4b1	C-type lectin domain family 4, member b1 [Source:MGI Symbol;Acc:MGI:1917060]	0.0131836	0.743079	0.364245	mMA032368	170.452	155.026	155.544	92.1608	51.2992	42.0132	160.184	58.3464
Lmbrd1	LMBR1 domain containing 1 [Source:MGI Symbol;Acc:MGI:1915671]	0.0132164	0.743079	0.805039	mMR028710	245.993	223.504	208.123	184.322	175.601	184.448	225.342	181.409
Dlg4	discs, large homolog 4 (Drosophila) [Source:MGI Symbol;Acc:MGI:1277959]	0.0133114	0.743079	1.41104	mMC018318	559.78	476.491	456.774	652.969	675.769	775.707	495.745	699.514
Fndc1	fibronectin type III domain containing 1 [Source:MGI Symbol;Acc:MGI:1915905]	0.013413	0.743079	0.179527	mMC024496	1324.88	956.786	1631.02	377.467	289.052	109.644	1273.94	228.707
Jkamp	JNK1/MAPK8-associated membrane protein [Source:MGI Symbol;Acc:MGI:1915057]	0.0134479	0.743079	0.670971	mMC026084	9433.94	9369.09	8215.36	6874.8	6171.69	5169.67	8988.19	6030.81
Mphosph9	M-phase phosphoprotein 9 [Source:MGI Symbol;Acc:MGI:2443138]	0.0135113	0.743079	1.60449	mMC014404	691.493	552.577	650.657	880.43	1195.67	975.526	628.798	1008.9
Camkk2	calcium/calmodulin-dependent protein kinase kinase 2, beta [Source:MGI Symbol;Acc:MGI:2444812]	0.0136022	0.743079	1.25365	mMC023304	326.377	333.829	293.562	379.428	388.69	427.305	317.43	397.946
Rhoh	ras homolog gene family, member H [Source:MGI Symbol;Acc:MGI:1921984]	0.0136654	0.743079	1.30413	mMR030896	125.902	101.766	108.443	146.085	146.006	144.484	111.586	145.523
Prss54	protease, serine 54 [Source:MGI Symbol;Acc:MGI:1918243]	0.0136835	0.743079	1.72405	mMC022715	90.0684	74.1842	69.009	116.672	124.302	162.929	77.2556	133.193
Med11	mediator complex subunit 11 [Source:MGI Symbol;Acc:MGI:1913422]	0.0137648	0.743079	1.37141	mMC003156	795.12	979.612	778.816	1174.56	1121.68	1187.64	846.527	1160.94
Zmiz1	zinc finger, MIZ-type containing 1 [Source:MGI Symbol;Acc:MGI:3040693]	0.0138057	0.743079	1.22614	mMA032096	380.612	388.041	382.288	427.469	499.181	487.763	383.634	470.389
Ndrg2	N-myc downstream regulated gene 2 [Source:MGI Symbol;Acc:MGI:1352498]	0.0138178	0.743079	0.282749	mMC004300	1554.41	2288.3	1517.1	850.036	395.596	362.748	1754.01	495.943
Nsun5	NOL1/NOP2/Sun domain family, member 5 [Source:MGI Symbol;Acc:MGI:2140844]	0.0138273	0.743079	2.57625	mMC020108	191.759	395.649	335.187	678.46	805.99	795.176	294.07	757.599
Srpx2	sushi-repeat-containing protein, X-linked 2 [Source:MGI Symbol;Acc:MGI:1916042]	0.0138687	0.743079	0.101401	mMC025958	4541.19	5489.63	14883	1132.4	1051.63	324.834	7185.67	728.633
		0.013967	0.743079	1.39299	mMC010353	720.547	811.271	925.598	1210.84	1108.85	1089.27	814.861	1135.09
Celf4	CUGBP, Elav-like family member 4 [Source:MGI Symbol;Acc:MGI:1932407]	0.0140552	0.743079	5.45717	mMR027688	148.177	122.689	44.9106	370.604	658.011	544.122	93.4643	510.051
Eng	endoglin [Source:MGI Symbol;Acc:MGI:95392]	0.0140644	0.743079	0.554429	mMR030489	953.951	852.168	751.432	595.124	446.895	391.44	848.49	470.428
Sparcl1	SPARC-like 1 [Source:MGI Symbol;Acc:MGI:108110]	0.0140992	0.743079	0.0811945	mMC016865	31.9598	104.619	199.359	8.82391	9.86524	4.09885	87.3541	7.09268
Bag6	BCL2-associated athanogene 6 [Source:MGI Symbol;Acc:MGI:1919439]	0.0141019	0.743079	1.60062	mMR029265	6381.3	5211.92	6163.71	7930.73	9674.84	10956.2	5896.35	9437.84
Prl2c3	prolactin family 2, subfamily c, member 3 [Source:MGI Symbol;Acc:MGI:1341833]	0.0141297	0.743079	41.4939	mMR028394	161.736	540.213	37.243	3821.73	15151	4014.82	148.185	6148.79
Ercc6l2	excision repair cross-complementing rodent repair deficiency, complementation group 6 like 2 [Source:MGI Symbol;Acc:MGI:1923501]	0.0142035	0.743079	0.660828	mMR026688	197.569	201.629	199.359	140.202	108.518	150.633	199.512	131.843
Tnfaip8	tumor necrosis factor, alpha-induced protein 8 [Source:MGI Symbol;Acc:MGI:2147191]	0.0142088	0.743079	1.54393	mMC025060	400.95	553.529	434.867	657.871	752.718	717.298	458.7	708.203
Arpp19	cAMP-regulated phosphoprotein 19 [Source:MGI Symbol;Acc:MGI:1891691]	0.0142254	0.743079	2.0317	mMR031246	254.71	151.222	204.836	409.822	460.707	350.451	199.078	404.466
Mroh3	maestro heat-like repeat family member 3 [Source:MGI Symbol;Acc:MGI:1923672]	0.0143139	0.743079	2.04713	mMC015849	64.888	60.8691	47.1014	88.2391	140.086	129.114	57.0863	116.863
Brd4	bromodomain containing 4 [Source:MGI Symbol;Acc:MGI:1888520]	0.0143632	0.743079	1.28715	mMA032002	118.154	114.13	112.824	133.339	163.763	148.583	115.014	148.041
		0.0143896	0.743079	1.25233	mMR029182	55.2032	52.3094	49.2922	66.6695	60.178	69.6804	52.2124	65.3871
		0.0144731	0.743079	1.60061	mMC024803	500.703	497.415	503.876	647.087	833.613	954.007	500.658	801.357
Upf3a	UPF3 regulator of nonsense transcripts homolog A (yeast) [Source:MGI Symbol;Acc:MGI:1914281]	0.0145051	0.743079	1.21484	mMC011807	2522.88	2361.53	2699.02	2993.27	3236.78	2975.76	2524.06	3066.33
Sgsm2	small G protein signaling modulator 2 [Source:MGI Symbol;Acc:MGI:2144695]	0.0146349	0.743079	2.08552	mMC004075	100.722	67.5267	86.5352	168.635	141.073	224.412	83.8038	174.775
Ptms	parathymosin [Source:MGI Symbol;Acc:MGI:1916452]	0.0146421	0.743079	0.52435	mMC025378	3411.95	2214.11	2688.07	1187.31	1614.94	1526.82	2728.23	1430.55
		0.0146433	0.743079	1.56723	mMC008330	135.587	161.684	163.212	200.009	258.469	266.425	152.948	239.705
Krit1	KRIT1, ankyrin repeat containing [Source:MGI Symbol;Acc:MGI:1930618]	0.0146823	0.743079	0.875641	mMA035058	760.255	756.109	699.949	652.969	662.944	624.05	738.25	646.442
Lum	lumican [Source:MGI Symbol;Acc:MGI:109347]	0.0147487	0.743079	0.124154	mMC010921	5979.38	7824.53	27712.1	1530.46	1723.46	940.686	10904.2	1353.8
F5	coagulation factor V [Source:MGI Symbol;Acc:MGI:88382]	0.0148944	0.743079	1.26289	mMC021306	289.575	266.302	260.701	360.8	359.095	312.537	271.911	343.394
Baiap2	brain-specific angiogenesis inhibitor 1-associated protein 2 [Source:MGI Symbol;Acc:MGI:2137336]	0.0149711	0.743079	2.3161	mMC005865	523.946	454.616	392.147	734.345	1142.39	1383.36	453.726	1050.87
Alox5ap	arachidonate 5-lipoxygenase activating protein [Source:MGI Symbol;Acc:MGI:107505]	0.0150105	0.743079	0.324182	mMC006717	495.861	322.416	663.801	206.872	111.477	156.781	473.447	153.483
		0.0151822	0.743079	1.66108	mMC026106	1054.67	1209.77	871.924	1854	1464.99	1877.27	1036.18	1721.17
Jkamp	JNK1/MAPK8-associated membrane protein [Source:MGI Symbol;Acc:MGI:1915057]	0.0151868	0.743079	0.560411	mMA035192	2139.37	2196.04	2011.12	1160.83	940.157	1523.75	2114.08	1184.75
Cr1l	complement component (3b/4b) receptor 1-like [Source:MGI Symbol;Acc:MGI:88513]	0.0152464	0.743079	0.543982	mMR026701	2809.55	2329.19	3117.46	1177.5	1559.69	1788.12	2732.42	1486.39
		0.0152998	0.743079	2.33035	mMC009736	122.997	83.695	128.16	254.913	336.405	194.695	109.677	255.586
Pth1r	parathyroid hormone 1 receptor [Source:MGI Symbol;Acc:MGI:97801]	0.0153235	0.743079	0.115204	mMR028796	672.124	843.608	1075.66	258.835	79.9084	45.0873	848.052	97.6989
Pcdh7	protocadherin 7 [Source:MGI Symbol;Acc:MGI:1860487]	0.0153886	0.743079	0.369578	mMA034102	349.62	405.16	477.586	237.265	124.302	115.792	407.466	150.59
Hspa8	heat shock protein 8 [Source:MGI Symbol;Acc:MGI:105384]	0.0153938	0.743079	1.5004	mMC025232	33831.8	47457	40873.1	58637.8	62874.1	60121.9	40335.5	60519.3
Magi2	membrane associated guanylate kinase, WW and PDZ domain containing 2 [Source:MGI Symbol;Acc:MGI:1354953]	0.0154212	0.743079	2.24361	mMC010124	126.871	132.2	227.839	368.643	308.782	379.143	156.341	350.769
Actn4	actinin alpha 4 [Source:MGI Symbol;Acc:MGI:1890773]	0.0154217	0.743079	0.536428	mMC025507	11917.1	15152.6	14479.9	5786.52	7570.58	9213.18	13776.6	7390.13
Sf3a1	splicing factor 3a, subunit 1 [Source:MGI Symbol;Acc:MGI:1914715]	0.0154294	0.743079	1.3086	mMR027064	868.725	1082.33	920.121	1239.27	1234.14	1267.57	952.859	1246.91
Ctc1	CTS telomere maintenance complex component 1 [Source:MGI Symbol;Acc:MGI:1916214]	0.0154374	0.743079	1.61925	mMC013371	1273.55	1237.35	1094.29	1818.71	2404.16	1674.38	1199.17	1941.75
Vamp1	vesicle-associated membrane protein 1 [Source:MGI Symbol;Acc:MGI:1313276]	0.0155185	0.743079	0.563233	mMC019699	536.537	680.022	711.998	311.778	332.459	447.799	638.068	359.381
Rbp1	retinol binding protein 1, cellular [Source:MGI Symbol;Acc:MGI:97876]	0.0155246	0.743079	0.294381	mMC008631	20049.4	17079.5	19171.4	8831.75	5979.32	3171.48	18724.5	5512.14
C1qa	complement component 1, q subcomponent, alpha polypeptide [Source:MGI Symbol;Acc:MGI:88223]	0.0155573	0.743079	0.0964757	mMC019379	958.793	352.851	664.897	158.83	33.5418	37.9143	608.168	58.6734
		0.0155615	0.743079	2.35301	mMC012241	79.4152	104.619	101.87	151.967	257.483	281.796	94.5919	222.576
Ly75	lymphocyte antigen 75 [Source:MGI Symbol;Acc:MGI:106662]	0.0155631	0.743079	2.60441	mMC019271	51.3293	38.0432	27.3845	72.5521	110.491	117.842	37.6747	98.1202
Ier5l	immediate early response 5-like [Source:MGI Symbol;Acc:MGI:1919750]	0.0156348	0.743079	0.705454	mMC015094	810.616	811.271	650.657	568.652	487.343	542.073	753.548	531.593
Gphn	gephyrin [Source:MGI Symbol;Acc:MGI:109602]	0.0156391	0.743079	0.541234	mMC007598	101.69	119.836	154.449	79.4152	58.2049	64.5569	123.467	66.8244
Ttll3	tubulin tyrosine ligase-like family, member 3 [Source:MGI Symbol;Acc:MGI:2141418]	0.0156691	0.743079	1.69751	mMR029550	49.3924	38.0432	47.1014	62.7478	89.7737	76.8534	44.5646	75.6491
Psmd6	proteasome (prosome, macropain) 26S subunit, non-ATPase, 6 [Source:MGI Symbol;Acc:MGI:1913663]	0.0156727	0.743079	0.681652	mMC013389	8312.44	9581.18	7258	5237.48	6238.78	5603.12	8330.19	5678.29
Gipc2	GIPC PDZ domain containing family, member 2 [Source:MGI Symbol;Acc:MGI:1889209]	0.0156967	0.743079	0.298348	mMC005541	168.515	225.406	169.784	94.1217	35.5149	51.2356	186.137	55.5338
Smim13	small integral membrane protein 13 [Source:MGI Symbol;Acc:MGI:2652854]	0.0157603	0.743079	0.669754	mMC014967	1202.85	991.025	1139.2	678.46	689.58	872.03	1107.38	741.675
Bmp1	bone morphogenetic protein 1 [Source:MGI Symbol;Acc:MGI:88176]	0.0157847	0.743079	0.423817	mMA033113	3224.06	2589.79	5043.14	1738.31	1393.96	1322.9	3479.01	1474.47
		0.0158431	0.743079	1.11887	mMC026055	205.317	201.629	205.932	216.676	232.82	236.708	204.284	228.568
Gipc1	GIPC PDZ domain containing family, member 1 [Source:MGI Symbol;Acc:MGI:1926252]	0.0158466	0.743079	0.762964	mMA031625	651.786	604.887	526.879	473.55	434.071	448.824	592.238	451.857
Slc11a2	solute carrier family 11 (proton-coupled divalent metal ion transporters), member 2 [Source:MGI Symbol;Acc:MGI:1345279]	0.0158544	0.743079	2.51251	mMC012956	329.282	385.187	267.273	593.163	762.583	1188.67	323.642	813.155
Pdgfrb	platelet derived growth factor receptor, beta polypeptide [Source:MGI Symbol;Acc:MGI:97531]	0.0161154	0.743079	0.345779	mMC011814	12176.7	9358.63	12722.9	6399.29	3214.09	2914.28	11318.1	3913.58
Dpy30	dpy-30, histone methyltransferase complex regulatory subunit [Source:MGI Symbol;Acc:MGI:1913560]	0.0162106	0.743079	1.94785	mMA032915	2304.01	2922.67	2200.62	3620.74	5250.28	5760.93	2456.23	4784.36
Ppcs	phosphopantothenoylcysteine synthetase [Source:MGI Symbol;Acc:MGI:1915237]	0.0162273	0.743079	1.73656	mMC017371	670.187	601.083	469.919	997.102	853.343	1165.1	574.184	997.107
Dido1	death inducer-obliterator 1 [Source:MGI Symbol;Acc:MGI:1344352]	0.0162502	0.743079	1.59691	mMR026418	457.121	520.241	415.15	762.778	857.289	614.827	462.183	738.062
Ppp2r5e	protein phosphatase 2, regulatory subunit B', epsilon [Source:MGI Symbol;Acc:MGI:1349473]	0.0162649	0.743079	0.661709	mMA031629	576.244	413.72	442.534	320.602	318.647	299.216	472.52	312.671
Smek1	SMEK homolog 1, suppressor of mek1 (Dictyostelium) [Source:MGI Symbol;Acc:MGI:1915984]	0.0163103	0.743079	0.609893	mMR028886	215.002	241.574	189.501	146.085	106.545	143.46	214.306	130.704
Cd300ld	CD300 molecule-like family member d [Source:MGI Symbol;Acc:MGI:2442358]	0.0163757	0.743079	0.348514	mMC003423	76.5097	71.331	97.489	45.1	25.6496	19.4695	81.0308	28.2404
		0.0164512	0.743079	1.84413	mMC018319	2191.67	2585.04	2297.02	3428.58	4201.61	5665.63	2352.17	4337.7
Comtd1	catechol-O-methyltransferase domain containing 1 [Source:MGI Symbol;Acc:MGI:1916406]	0.0164669	0.743079	1.68897	mMC008347	184.011	143.613	124.874	249.03	224.927	283.845	148.88	251.454
Cwc25	CWC25 spliceosome-associated protein [Source:MGI Symbol;Acc:MGI:1914730]	0.0165409	0.743079	0.804469	mMR027003	403.855	409.915	397.624	310.798	304.836	361.723	403.767	324.818
Pitpnm1	phosphatidylinositol transfer protein, membrane-associated 1 [Source:MGI Symbol;Acc:MGI:1197524]	0.0165433	0.743079	1.66843	mMC016130	1223.19	1555.02	1066.9	1854.98	2189.1	2320.97	1266.05	2112.31
		0.0166368	0.743079	1.5559	mMC022338	95.8793	75.1353	109.538	147.065	145.019	139.361	92.4084	143.778
Cox16	cytochrome c oxidase assembly protein 16 [Source:MGI Symbol;Acc:MGI:1913522]	0.0167478	0.743079	0.611648	mMC021915	1593.15	1101.35	1408.66	894.156	733.974	861.783	1352.06	826.984
Sbsn	suprabasin [Source:MGI Symbol;Acc:MGI:2446326]	0.0169025	0.743079	2.40271	mMR027794	1073.07	977.71	1103.05	1653.99	3452.83	2810.78	1049.89	2522.58
Snrnp48	small nuclear ribonucleoprotein 48 (U11/U12) [Source:MGI Symbol;Acc:MGI:1915047]	0.0169499	0.743079	1.33631	mMC005485	706.02	629.615	646.275	858.86	997.376	800.3	659.837	881.748
Ampd3	adenosine monophosphate deaminase 3 [Source:MGI Symbol;Acc:MGI:1096344]	0.0169945	0.743079	1.8533	mMC002907	987.847	694.288	1077.86	1440.26	1724.44	1894.69	904.198	1675.75
Rftn1	raftlin lipid raft linker 1 [Source:MGI Symbol;Acc:MGI:1923688]	0.0170352	0.743079	0.218542	mMR027176	3523.32	2114.25	2898.38	1208.88	511.019	364.797	2784.55	608.542
Nudt4	nudix (nucleoside diphosphate linked moiety X)-type motif 4 [Source:MGI Symbol;Acc:MGI:1918457]	0.0171066	0.743079	0.590581	mMC006826	6116.91	6787.86	8564.79	4122.73	4921.77	3610.06	7084.79	4184.14
		0.0171363	0.743079	0.608166	mMR030230	112.343	106.521	147.877	73.5326	83.8545	64.5569	120.956	73.5613
Wdr83	WD repeat domain containing 83 [Source:MGI Symbol;Acc:MGI:1915086]	0.0172236	0.743079	0.817816	mMR029405	2450.25	2331.1	2577.43	1882.43	1969.1	2172.39	2450.86	2004.36
Shc1	src homology 2 domain-containing transforming protein C1 [Source:MGI Symbol;Acc:MGI:98296]	0.0172827	0.743079	0.503374	mMC021453	351.557	289.128	274.941	202.95	117.396	149.608	303.465	152.756
Loxl2	lysyl oxidase-like 2 [Source:MGI Symbol;Acc:MGI:2137913]	0.0172876	0.743079	0.333723	mMR027074	2464.78	1940.2	1115.1	773.563	559.359	458.046	1747.08	583.04
		0.0174053	0.743079	2.2797	mMA033161	67.7934	75.1353	105.157	143.143	176.588	251.054	81.2125	185.14
Numb	numb gene homolog (Drosophila) [Source:MGI Symbol;Acc:MGI:107423]	0.0175464	0.743079	0.904309	mMR027590	357.368	373.774	386.67	342.172	339.364	328.933	372.411	336.774
Abcc5	ATP-binding cassette, sub-family C (CFTR/MRP), member 5 [Source:MGI Symbol;Acc:MGI:1351644]	0.0176246	0.743079	1.5953	mMC003052	57.1402	42.7986	44.9106	77.4543	66.0971	87.1005	47.8895	76.3982
Samsn1	SAM domain, SH3 domain and nuclear localization signals, 1 [Source:MGI Symbol;Acc:MGI:1914992]	0.0176277	0.743079	0.561415	mMR028594	73.6043	58.0159	53.6737	43.1391	30.5822	30.7414	61.198	34.3575
Sorcs2	sortilin-related VPS10 domain containing receptor 2 [Source:MGI Symbol;Acc:MGI:1932289]	0.017746	0.743079	0.126439	mMC010937	207.254	175.95	254.129	61.7674	29.5957	10.2471	210.046	26.5581
Tpd52l1	tumor protein D52-like 1 [Source:MGI Symbol;Acc:MGI:1298386]	0.0177686	0.743079	2.12265	mMA035295	394.17	566.844	354.904	701.01	1021.05	1059.55	429.621	911.937
Syde2	synapse defective 1, Rho GTPase, homolog 2 (C. elegans) [Source:MGI Symbol;Acc:MGI:3036264]	0.0178087	0.743079	0.420909	mMC015706	267.3	212.091	331.901	137.261	77.9354	131.163	265.976	111.952
Dact1	dishevelled-binding antagonist of beta-catenin 1 [Source:MGI Symbol;Acc:MGI:1891740]	0.0179322	0.743079	0.33883	mMR029001	82.3206	73.2332	170.88	37.2565	37.4879	28.6919	100.996	34.2203
Mb21d1	Mab-21 domain containing 1 [Source:MGI Symbol;Acc:MGI:2442261]	0.0180237	0.743079	1.72901	mMC022788	2074.48	2409.09	2205	3006.01	3963.85	4780.28	2225.31	3847.58
Zfp692	zinc finger protein 692 [Source:MGI Symbol;Acc:MGI:2144276]	0.0180622	0.743079	2.00778	mMC018626	448.405	493.61	380.097	756.895	1219.34	737.793	438.177	879.762
Acsl5	acyl-CoA synthetase long-chain family member 5 [Source:MGI Symbol;Acc:MGI:1919129]	0.0182463	0.743079	2.69911	mMA034018	344.778	271.058	148.972	580.417	650.119	725.496	240.567	649.316
Sppl2a	signal peptide peptidase like 2A [Source:MGI Symbol;Acc:MGI:1913802]	0.0182478	0.743079	0.684504	mMC022590	393.202	382.334	374.621	303.935	272.281	218.264	383.31	262.377
Pdxk	pyridoxal (pyridoxine, vitamin B6) kinase [Source:MGI Symbol;Acc:MGI:1351869]	0.018248	0.743079	1.66337	mMC024642	44.55	51.3583	53.6737	88.2391	97.6659	65.5816	49.7057	82.679
Gid8	GID complex subunit 8 [Source:MGI Symbol;Acc:MGI:1923675]	0.0182492	0.743079	0.695985	mMA033552	1029.49	1205.97	1114	744.15	908.589	689.631	1114.16	775.44
Agk	acylglycerol kinase [Source:MGI Symbol;Acc:MGI:1917173]	0.0183465	0.743079	1.65804	mMC024128	68.7619	46.6029	52.5783	103.926	84.8411	87.1005	55.2318	91.5764
Zmat5	zinc finger, matrin type 5 [Source:MGI Symbol;Acc:MGI:1914428]	0.0184245	0.743079	1.49031	mMC004320	1328.75	1372.41	1400.99	1693.21	2068.74	2414.22	1367.06	2037.35
Pdia5	protein disulfide isomerase associated 5 [Source:MGI Symbol;Acc:MGI:1919849]	0.0185561	0.743079	0.473267	mMC014930	4908.25	6187.73	4256.65	3242.3	2265.06	1866	5056.41	2393.03
Cdk2ap2	CDK2-associated protein 2 [Source:MGI Symbol;Acc:MGI:1098779]	0.0185746	0.743079	1.28802	mMC018986	2676.87	2783.81	2844.71	3316.81	3374.9	4046.59	2767.59	3564.7
Piezo2	piezo-type mechanosensitive ion channel component 2 [Source:MGI Symbol;Acc:MGI:1918781]	0.0186201	0.743079	0.169465	mMR030794	94.9108	51.3583	130.35	29.413	12.8248	8.1977	85.9699	14.5689
Lama5	laminin, alpha 5 [Source:MGI Symbol;Acc:MGI:105382]	0.0188056	0.743079	0.49654	mMC024285	574.307	523.094	928.884	353.937	305.822	315.611	653.474	324.476
Grn	granulin [Source:MGI Symbol;Acc:MGI:95832]	0.0188359	0.743079	0.437897	mMC004917	3845.83	5084.47	6426.6	2116.76	1702.74	2927.6	5008.86	2193.36
Fam160a2	family with sequence similarity 160, member A2 [Source:MGI Symbol;Acc:MGI:1921599]	0.018864	0.743079	1.81823	mMC006876	44.55	43.7497	55.8645	109.809	86.8141	68.6557	47.7514	86.8229
Dll4	delta-like 4 (Drosophila) [Source:MGI Symbol;Acc:MGI:1859388]	0.0189509	0.743079	0.384678	mMR029389	61.0141	67.5267	131.446	35.2956	31.5688	27.6672	81.5112	31.3556
Avp	arginine vasopressin [Source:MGI Symbol;Acc:MGI:88121]	0.0189692	0.743079	1.45404	mMC018816	102.659	91.3037	97.489	169.615	127.262	130.138	97.039	141.099
		0.0190252	0.743079	2.03934	mMC006388	1220.28	1265.89	1112.91	1720.66	3195.35	2651.95	1197.95	2443.02
Wdr66	WD repeat domain 66 [Source:MGI Symbol;Acc:MGI:1918495]	0.0190507	0.743079	1.36374	mMC019077	66.825	56.1137	53.6737	85.2978	73.0028	81.977	58.6034	79.9201
Ssfa2	sperm specific antigen 2 [Source:MGI Symbol;Acc:MGI:1917849]	0.0192479	0.743079	0.37979	mMC016543	1900.15	1013.85	1925.68	782.387	510.033	509.282	1548.04	587.93
Lsm14b	LSM14 homolog B (SCD6, S. cerevisiae) [Source:MGI Symbol;Acc:MGI:3040677]	0.0192588	0.743079	1.34509	mMA032802	85.226	77.0375	75.5813	118.633	93.7198	108.619	79.1704	106.491
Prpf38a	PRP38 pre-mRNA processing factor 38 (yeast) domain containing A [Source:MGI Symbol;Acc:MGI:1916962]	0.0192732	0.743079	1.61189	mMR030146	1157.33	1207.87	1335.27	1660.86	1894.13	2484.93	1231.26	1984.65
Srpx	sushi-repeat-containing protein [Source:MGI Symbol;Acc:MGI:1858306]	0.0192823	0.743079	0.0595437	mMC019720	1391.7	1298.22	7064.12	372.565	96.6793	74.804	2336.96	139.151
Msl2	male-specific lethal 2 homolog (Drosophila) [Source:MGI Symbol;Acc:MGI:1925103]	0.019291	0.743079	1.39342	mMC023378	424.193	493.61	474.3	571.593	739.893	635.321	463.092	645.282
Ero1l	ERO1-like (S. cerevisiae) [Source:MGI Symbol;Acc:MGI:1354385]	0.019355	0.743079	1.89584	mMC019472	114.28	124.591	107.347	157.85	248.604	265.4	115.191	218.383
Gpatch2l	G patch domain containing 2 like [Source:MGI Symbol;Acc:MGI:1917623]	0.0193795	0.743079	0.580033	mMC019881	422.256	400.405	400.91	306.876	229.86	187.522	407.731	236.497
Hspe1	heat shock protein 1 (chaperonin 10) [Source:MGI Symbol;Acc:MGI:104680]	0.0193825	0.743079	1.44103	mMC026101	14769.3	14457.4	11566.1	17392.9	20503.9	20722.7	13517	19478.3
Kalrn	kalirin, RhoGEF kinase [Source:MGI Symbol;Acc:MGI:2685385]	0.0194199	0.743079	0.424899	mMC022700	49.3924	76.0864	78.8675	36.2761	30.5822	20.4942	66.6738	28.3296
Arhgap5	Rho GTPase activating protein 5 [Source:MGI Symbol;Acc:MGI:1332637]	0.0194246	0.743079	0.714171	mMR028655	480.365	404.209	460.06	343.152	276.227	343.278	447.024	319.251
Igdcc4	immunoglobulin superfamily, DCC subclass, member 4 [Source:MGI Symbol;Acc:MGI:1858497]	0.0194706	0.743079	0.2674	mMC013419	870.661	1564.53	1567.49	609.83	279.186	239.783	1287.69	344.329
Gdf6	growth differentiation factor 6 [Source:MGI Symbol;Acc:MGI:95689]	0.019487	0.743079	0.244019	mMC024914	2062.86	1573.09	1484.24	811.8	361.068	238.758	1688.79	412.096
Ttll5	tubulin tyrosine ligase-like family, member 5 [Source:MGI Symbol;Acc:MGI:2443657]	0.0195661	0.743079	1.89982	mMC006752	176.263	133.151	223.458	325.504	289.052	382.218	173.74	330.076
H2-K1	histocompatibility 2, K1, K region [Source:MGI Symbol;Acc:MGI:95904]	0.0196265	0.743079	0.516921	mMR028842	684.714	815.075	788.675	369.624	538.642	305.364	760.679	393.211
Adgrd1	adhesion G protein-coupled receptor D1 [Source:MGI Symbol;Acc:MGI:3041203]	0.0197254	0.743079	0.198601	mMC015748	847.418	1409.5	2649.73	451	313.715	175.226	1468.21	291.588
Ttc4	tetratricopeptide repeat domain 4 [Source:MGI Symbol;Acc:MGI:1919604]	0.0197325	0.743079	1.84941	mMC011985	588.834	747.549	540.023	1020.63	989.483	1488.91	619.463	1145.64
Tmtc4	transmembrane and tetratricopeptide repeat containing 4 [Source:MGI Symbol;Acc:MGI:1921050]	0.0198056	0.743079	0.487404	mMC006167	152.051	133.151	147.877	84.3173	48.3397	85.0511	144.127	70.2479
Stat5b	signal transducer and activator of transcription 5B [Source:MGI Symbol;Acc:MGI:103035]	0.0199133	0.743079	0.629637	mMC006144	215.971	317.661	290.276	180.4	174.615	157.806	271.054	170.666
Scfd1	Sec1 family domain containing 1 [Source:MGI Symbol;Acc:MGI:1924233]	0.0199937	0.743079	0.64314	mMA033153	1198.01	1545.5	1321.03	747.091	1024.01	850.511	1347.35	866.535
Robo4	roundabout homolog 4 (Drosophila) [Source:MGI Symbol;Acc:MGI:1921394]	0.0201375	0.743079	0.0624423	mMR030248	165.61	252.036	739.383	55.8848	18.744	7.17298	313.67	19.5863
		0.0202895	0.743079	0.327713	mMA034357	502.64	816.978	477.586	278.443	120.356	205.967	580.996	190.4
		0.0203299	0.743079	0.221657	mMC009735	11852.2	13258.1	16985	6085.56	3028.63	1577.03	13871.2	3074.65
Ccdc77	coiled-coil domain containing 77 [Source:MGI Symbol;Acc:MGI:1914450]	0.0203356	0.743079	1.40059	mMC012534	252.773	213.042	211.409	283.345	307.795	358.649	224.96	315.077
Fam73a	family with sequence similarity 73, member A [Source:MGI Symbol;Acc:MGI:1924567]	0.0203481	0.743079	0.346762	mMR026653	85.226	77.9886	89.8213	50.9826	20.717	23.5684	84.203	29.1984
Gfra1	glial cell line derived neurotrophic factor family receptor alpha 1 [Source:MGI Symbol;Acc:MGI:1100842]	0.02035	0.743079	0.343074	mMC020431	653.722	719.016	1605.83	325.504	320.62	292.043	910.494	312.367
Ski	ski sarcoma viral oncogene homolog (avian) [Source:MGI Symbol;Acc:MGI:98310]	0.0203614	0.743079	0.260254	mMC016955	1859.48	991.025	647.371	364.722	191.386	301.265	1060.58	276.02
Guca1b	guanylate cyclase activator 1B [Source:MGI Symbol;Acc:MGI:1194489]	0.020375	0.743079	1.12279	mMC008429	100.722	96.0591	92.0121	105.887	106.545	111.694	96.1986	108.011
Clcn3	chloride channel, voltage-sensitive 3 [Source:MGI Symbol;Acc:MGI:103555]	0.0204175	0.743079	2.4138	mMA035580	51.3293	55.1626	37.243	83.3369	106.545	167.028	47.2445	114.039
Tpst1	protein-tyrosine sulfotransferase 1 [Source:MGI Symbol;Acc:MGI:1298231]	0.0204283	0.743079	1.71679	mMC022258	1102.13	1100.4	800.724	1436.34	2023.36	1690.77	990.273	1700.09
Ung	uracil DNA glycosylase [Source:MGI Symbol;Acc:MGI:109352]	0.020462	0.743079	2.24098	mMC006691	143.335	172.145	112.824	240.206	441.963	295.117	140.675	315.25
Prickle3	prickle homolog 3 (Drosophila) [Source:MGI Symbol;Acc:MGI:1859635]	0.0204742	0.743079	0.676772	mMC000873	560.749	505.023	665.992	443.156	369.946	356.6	573.477	388.114
Gstp1	glutathione S-transferase, pi 1 [Source:MGI Symbol;Acc:MGI:95865]	0.0205146	0.743079	1.27385	mMC025098	21812.1	21083.5	17897.4	26856.1	24888	25453.8	20190.3	25719.5
Srek1	splicing regulatory glutamine/lysine-rich protein 1 [Source:MGI Symbol;Acc:MGI:2145245]	0.0205498	0.743079	2.55177	mMA035642	131.713	113.179	201.55	276.482	348.243	518.504	144.297	368.214
Poll	polymerase (DNA directed), lambda [Source:MGI Symbol;Acc:MGI:1889000]	0.0205512	0.743079	1.77654	mMC011567	292.48	379.481	276.036	441.195	590.928	658.89	312.909	555.895
Lamb1	laminin B1 [Source:MGI Symbol;Acc:MGI:96743]	0.0206276	0.743079	1.58322	mMC023710	54.2348	60.8691	44.9106	95.1021	71.0297	87.1005	52.9267	83.7948
Lpcat1	lysophosphatidylcholine acyltransferase 1 [Source:MGI Symbol;Acc:MGI:2384812]	0.0206773	0.743079	1.77239	mMC017331	272.142	260.596	189.501	365.702	515.952	396.564	237.752	421.389
		0.0207165	0.743079	1.89333	mMC011402	54.2348	56.1137	86.5352	105.887	119.369	141.41	64.0983	121.359
Rbms3	RNA binding motif, single stranded interacting protein [Source:MGI Symbol;Acc:MGI:2444477]	0.0207242	0.743079	0.224729	mMC010291	4151.86	3819.54	8697.33	2106.95	761.596	975.526	5166.7	1161.11
Krt42	keratin 42 [Source:MGI Symbol;Acc:MGI:1915489]	0.0207333	0.743079	1.50625	mMR028879	68.7619	57.0648	51.4829	92.1608	76.9489	97.3476	58.6759	88.3808
Trappc5	trafficking protein particle complex 5 [Source:MGI Symbol;Acc:MGI:1913932]	0.0207694	0.743079	1.56805	mMC014683	399.981	314.807	396.528	481.393	612.631	652.741	368.23	577.404
		0.0207893	0.743079	1.81638	mMC023980	78.4467	74.1842	94.2028	154.909	186.453	113.743	81.8434	148.659
B4galt1	UDP-Gal:betaGlcNAc beta 1,4- galactosyltransferase, polypeptide 1 [Source:MGI Symbol;Acc:MGI:95705]	0.0208871	0.743079	0.786426	mMC015115	5305.32	4866.68	4824.06	4201.16	3503.15	4116.27	4994.04	3927.45
Gusb	glucuronidase, beta [Source:MGI Symbol;Acc:MGI:95872]	0.0209114	0.743079	1.42592	mMC016767	1827.52	1692.92	1348.41	2165.78	2339.05	2387.58	1609.81	2295.46
Adgre1	adhesion G protein-coupled receptor E1 [Source:MGI Symbol;Acc:MGI:106912]	0.0209796	0.743079	0.167208	mMC018271	207.254	104.619	475.396	53.9239	33.5418	26.6425	217.632	36.3899
Gcn1l1	GCN1 general control of amino-acid synthesis 1-like 1 (yeast) [Source:MGI Symbol;Acc:MGI:2444248]	0.0210759	0.743079	1.5087	mMR030090	402.887	466.98	437.057	728.463	726.082	533.875	434.85	656.061
Cuta	cutA divalent cation tolerance homolog [Source:MGI Symbol;Acc:MGI:1914925]	0.0211393	0.743079	1.12713	mMC003948	10006.3	9852.24	9446.57	10563.2	11598.6	10884.5	9765.5	11007
Gbx2	gastrulation brain homeobox 2 [Source:MGI Symbol;Acc:MGI:95668]	0.0211414	0.743079	0.124184	mMC010627	520.073	208.287	377.907	110.789	34.5283	20.4942	344.643	42.7991
Fam175b	family with sequence similarity 175, member B [Source:MGI Symbol;Acc:MGI:1926116]	0.021153	0.743079	0.79785	mMC005663	3993.03	4027.82	3836.03	3519.76	3101.63	2870.22	3951.41	3152.63
Rcbtb2	regulator of chromosome condensation (RCC1) and BTB (POZ) domain containing protein 2 [Source:MGI Symbol;Acc:MGI:1917200]	0.0211602	0.743079	0.433843	mMC015762	154.956	189.265	284.799	112.75	86.8141	69.6804	202.896	88.0249
Rac3	RAS-related C3 botulinum substrate 3 [Source:MGI Symbol;Acc:MGI:2180784]	0.0212863	0.743079	0.416777	mMC004764	240.182	260.596	286.99	109.809	162.776	72.7545	261.894	109.151
		0.0212872	0.743079	0.495505	mMC012440	81.3521	88.4504	144.59	52.9434	54.2588	44.0626	101.33	50.2093
Sbsn	suprabasin [Source:MGI Symbol;Acc:MGI:2446326]	0.0213413	0.743079	5.00646	mMR026612	89.1	58.0159	53.6737	150.006	600.793	386.316	65.2222	326.532
Trim33	tripartite motif-containing 33 [Source:MGI Symbol;Acc:MGI:2137357]	0.0214014	0.743079	1.41323	mMC009211	75.5413	71.331	84.3444	94.1217	124.302	109.644	76.8846	108.655
Fam129a	family with sequence similarity 129, member A [Source:MGI Symbol;Acc:MGI:2137237]	0.02146	0.743079	0.707189	mMR026423	620.794	697.142	827.013	548.063	473.531	487.763	710.003	502.107
Arhgap44	Rho GTPase activating protein 44 [Source:MGI Symbol;Acc:MGI:2144423]	0.0215003	0.743079	0.555735	mMC012635	401.918	403.258	614.509	300.013	240.712	236.708	463.535	257.603
Pitpnm3	PITPNM family member 3 [Source:MGI Symbol;Acc:MGI:2685726]	0.0216692	0.743079	0.6933	mMC022013	67.7934	53.2605	55.8645	46.0804	36.5014	39.9638	58.6466	40.6597
Luc7l	Luc7 homolog (S. cerevisiae)-like [Source:MGI Symbol;Acc:MGI:1914228]	0.0217145	0.743079	1.70393	mMA033793	864.851	1066.16	891.641	1232.41	1871.44	1763.53	936.809	1596.26
Cstf1	cleavage stimulation factor, 3' pre-RNA, subunit 1 [Source:MGI Symbol;Acc:MGI:1914587]	0.0217263	0.743079	1.73502	mMC025580	897.779	1011.95	1199.44	1608.89	1543.91	2291.26	1029.05	1785.42
Med24	mediator complex subunit 24 [Source:MGI Symbol;Acc:MGI:1344385]	0.0218967	0.743079	1.57966	mMC008687	1942.77	1882.19	1577.35	2293.24	3256.52	3044.42	1793.37	2832.93
Lpl	lipoprotein lipase [Source:MGI Symbol;Acc:MGI:96820]	0.0219311	0.743079	0.0702216	mMC023651	399.981	443.203	2592.77	121.574	34.5283	37.9143	771.736	54.1926
Celf1	CUGBP, Elav-like family member 1 [Source:MGI Symbol;Acc:MGI:1342295]	0.0220259	0.743079	1.41869	mMC024730	925.865	769.424	733.906	1007.89	1182.84	1252.2	805.597	1142.89
Meox1	mesenchyme homeobox 1 [Source:MGI Symbol;Acc:MGI:103220]	0.0220338	0.743079	0.405925	mMC003467	152.051	123.64	92.0121	62.7478	56.2319	32.7908	120.042	48.7279
Pcyt1a	phosphate cytidylyltransferase 1, choline, alpha isoform [Source:MGI Symbol;Acc:MGI:88557]	0.0221728	0.743079	0.670811	mMR030276	441.626	453.665	327.519	284.326	275.24	253.104	403.344	270.568
Gramd1a	GRAM domain containing 1A [Source:MGI Symbol;Acc:MGI:105490]	0.022225	0.743079	2.20537	mMC025052	178.2	290.079	157.735	552.965	418.286	378.119	201.272	443.881
Nbea	neurobeachin [Source:MGI Symbol;Acc:MGI:1347075]	0.0222389	0.743079	0.638161	mMC021891	439.689	506.926	355.999	301.974	239.725	284.87	429.714	274.227
		0.02228	0.743079	1.62799	mMC006319	53.2663	60.8691	74.486	91.1804	93.7198	121.941	62.2742	101.382
Magi3	membrane associated guanylate kinase, WW and PDZ domain containing 3 [Source:MGI Symbol;Acc:MGI:1923484]	0.0222989	0.743079	1.6678	mMA035252	128.808	141.711	134.732	257.854	170.669	259.252	134.981	225.121
Pex2	peroxisomal biogenesis factor 2 [Source:MGI Symbol;Acc:MGI:107486]	0.0223062	0.743079	0.789199	mMC013158	5126.15	4675.51	4121.92	3750.16	3540.63	3657.2	4622.82	3648.32
Pf4	platelet factor 4 [Source:MGI Symbol;Acc:MGI:1888711]	0.0223209	0.743079	0.155762	mMC012732	219.844	1036.68	819.346	97.063	114.437	63.5321	571.578	89.0302
Gm28045	prion protein gene complex [Source:MGI Symbol;Acc:MGI:97767]	0.0223628	0.743079	0.113853	mMC022033	186.916	336.682	911.358	68.6304	60.178	20.4942	385.643	43.9065
Cldn10	claudin 10 [Source:MGI Symbol;Acc:MGI:1913101]	0.0223729	0.743079	0.565453	mMA033359	177.231	177.852	261.796	135.3	99.6389	110.669	202.079	114.266
Klhl5	kelch-like 5 [Source:MGI Symbol;Acc:MGI:1919028]	0.0224465	0.743079	0.533646	mMC010571	1162.17	887.358	667.087	471.589	419.273	528.751	882.777	471.09
9130023H24Rik	RIKEN cDNA 9130023H24 gene [Source:MGI Symbol;Acc:MGI:2442738]	0.0224639	0.743079	0.543808	mMC010050	473.586	432.741	627.654	350.015	257.483	229.535	504.796	274.512
		0.0225151	0.743079	1.87176	mMA033888	36.8022	54.2116	31.7661	76.4739	82.868	65.5816	39.8697	74.6266
Il3ra	interleukin 3 receptor, alpha chain [Source:MGI Symbol;Acc:MGI:96553]	0.0226123	0.743079	0.419403	mMC013319	2001.84	2376.75	3524.94	1515.75	927.332	880.228	2559.7	1073.54
Slc25a39	solute carrier family 25, member 39 [Source:MGI Symbol;Acc:MGI:1196386]	0.022619	0.743079	1.32752	mMC021601	9603.43	8934.44	7711.49	11597.6	12483.5	10691.8	8713.86	11567.8
Mthfsd	methenyltetrahydrofolate synthetase domain containing [Source:MGI Symbol;Acc:MGI:2679252]	0.0226726	0.743079	2.01441	mMC020965	1002.37	581.11	622.177	1243.19	1400.86	1701.02	712.964	1436.2
		0.0226824	0.743079	2.23603	mMR028963	118.154	77.9886	92.0121	148.046	228.874	279.746	94.6473	211.634
Rnpepl1	arginyl aminopeptidase (aminopeptidase B)-like 1 [Source:MGI Symbol;Acc:MGI:1914170]	0.0226845	0.743079	0.645248	mMC021973	1302.6	1163.17	1605.83	990.239	759.623	868.956	1344.99	867.851
Rspry1	ring finger and SPRY domain containing 1 [Source:MGI Symbol;Acc:MGI:1914860]	0.0226902	0.743079	0.554053	mMC005571	193.696	295.786	331.901	146.085	147.979	149.608	266.912	147.883
Myo1g	myosin IG [Source:MGI Symbol;Acc:MGI:1927091]	0.0227681	0.743079	0.242685	mMC015681	67.7934	41.8475	88.7259	29.413	10.8518	11.2718	63.1397	15.323
Ngfrap1	nerve growth factor receptor (TNFRSF16) associated protein 1 [Source:MGI Symbol;Acc:MGI:1338016]	0.0228183	0.743079	1.95211	mMR026970	8789.9	9520.31	8913.12	13727.1	15957	25330.9	9068.91	17703.5
Srpx	sushi-repeat-containing protein [Source:MGI Symbol;Acc:MGI:1858306]	0.0228395	0.743079	0.0724466	mMA033408	945.234	1151.76	4660.85	340.211	100.625	56.3592	1718.39	124.492
		0.0228434	0.743079	1.26592	mMC012941	62.9511	60.8691	51.4829	75.4934	74.9758	70.7051	58.2132	73.6931
Yeats2	YEATS domain containing 2 [Source:MGI Symbol;Acc:MGI:2447762]	0.0228483	0.743079	1.3176	mMC018244	1669.66	1428.52	1770.14	2012.83	2313.4	2074.02	1616.24	2129.56
Serpinf1	serine (or cysteine) peptidase inhibitor, clade F, member 1 [Source:MGI Symbol;Acc:MGI:108080]	0.0228635	0.743079	0.407284	mMC022355	36681.1	46122.6	40886.2	25581.5	16446.3	11107.9	41049.8	16718.9
Sav1	salvador homolog 1 (Drosophila) [Source:MGI Symbol;Acc:MGI:1927144]	0.0228777	0.743079	0.720459	mMC003447	5345.03	5734.06	4910.6	4277.63	4006.27	3284.2	5319.23	3832.29
		0.0229314	0.743079	3.23618	mMC016990	128.808	136.004	92.0121	407.861	616.577	217.239	117.25	379.442
Clcn3	chloride channel, voltage-sensitive 3 [Source:MGI Symbol;Acc:MGI:103555]	0.0229951	0.743079	1.89167	mMA033409	494.892	320.514	389.956	623.556	705.365	951.957	395.48	748.116
Exosc7	exosome component 7 [Source:MGI Symbol;Acc:MGI:1913696]	0.0230226	0.743079	2.17366	mMC012444	795.12	1301.08	726.238	1560.85	2267.03	2180.59	909.086	1976.05
Smco4	single-pass membrane protein with coiled-coil domains 4 [Source:MGI Symbol;Acc:MGI:3039636]	0.023063	0.743079	0.698571	mMC012836	717.642	827.44	774.435	450.019	602.766	577.938	771.868	539.205
Rad23a	RAD23a homolog (S. cerevisiae) [Source:MGI Symbol;Acc:MGI:105126]	0.0230975	0.743079	1.25874	mMC005530	420.319	419.426	369.144	521.591	539.629	461.12	402.232	506.306
Galnt16	UDP-N-acetyl-alpha-D-galactosamine:polypeptide N-acetylgalactosaminyltransferase 16 [Source:MGI Symbol;Acc:MGI:1917754]	0.0231223	0.743079	0.0650391	mMC023993	638.227	227.308	865.352	118.633	17.7574	16.3954	500.719	32.5663
Parp1	poly (ADP-ribose) polymerase family, member 1 [Source:MGI Symbol;Acc:MGI:1340806]	0.0231352	0.743079	1.52083	mMC025866	2245.9	1627.3	1656.22	2700.12	3067.1	2571	1822.46	2771.65
Apool	apolipoprotein O-like [Source:MGI Symbol;Acc:MGI:1915367]	0.0231451	0.743079	0.531848	mMC020514	195.633	203.531	203.741	145.104	78.9219	106.57	200.932	106.866
App	amyloid beta (A4) precursor protein [Source:MGI Symbol;Acc:MGI:88059]	0.0232124	0.743079	0.481294	mMR026902	15462.7	16338.6	22018.3	11572.1	8411.1	6371.66	17718.5	8527.83
Dse	dermatan sulfate epimerase [Source:MGI Symbol;Acc:MGI:2443455]	0.0232198	0.743079	0.334123	mMC009259	1129.25	976.759	1787.66	315.7	340.351	684.508	1253.97	418.98
Bmpr1a	bone morphogenetic protein receptor, type 1A [Source:MGI Symbol;Acc:MGI:1338938]	0.0232345	0.743079	0.622046	mMC020193	1512.76	1194.56	1490.81	1068.67	744.826	814.646	1391.45	865.545
D630045J12Rik	RIKEN cDNA D630045J12 gene [Source:MGI Symbol;Acc:MGI:2669829]	0.0232361	0.743079	1.85808	mMC019250	129.776	121.738	110.634	162.752	286.092	240.807	120.458	223.821
Chst2	carbohydrate sulfotransferase 2 [Source:MGI Symbol;Acc:MGI:1891160]	0.0232517	0.743079	0.270991	mMR027499	516.199	509.779	542.214	291.189	89.7737	108.619	522.544	141.605
Glis2	GLIS family zinc finger 2 [Source:MGI Symbol;Acc:MGI:1932535]	0.023305	0.743079	0.763899	mMR026741	290.543	277.715	320.947	251.972	203.224	225.437	295.857	226.004
Wnk4	WNK lysine deficient protein kinase 4 [Source:MGI Symbol;Acc:MGI:1917097]	0.0233197	0.743079	5.16328	mMC007670	28.0859	34.2389	42.7199	76.4739	216.049	342.254	34.5048	178.158
Tmem159	transmembrane protein 159 [Source:MGI Symbol;Acc:MGI:1925752]	0.0233292	0.743079	0.401442	mMC004174	1242.56	742.793	1371.42	317.661	450.841	571.789	1081.73	434.251
Narf	nuclear prelamin A recognition factor [Source:MGI Symbol;Acc:MGI:1914858]	0.0233327	0.743079	1.53777	mMC002209	199.506	156.928	133.637	250.991	259.456	233.634	161.137	247.791
Sorbs1	sorbin and SH3 domain containing 1 [Source:MGI Symbol;Acc:MGI:700014]	0.0233436	0.743079	0.546232	mMA034331	171.421	185.461	145.686	120.593	71.0297	88.1252	166.69	91.0517
		0.0233957	0.743079	1.68276	mMC007201	68.7619	65.6245	58.0552	82.3565	117.396	129.114	63.986	107.673
Gldc	glycine decarboxylase [Source:MGI Symbol;Acc:MGI:1341155]	0.0234444	0.743079	1.89162	mMC017244	732.169	582.061	739.383	1059.85	1136.48	1770.7	680.482	1287.21
Gm7901	predicted gene 7901 [Source:MGI Symbol;Acc:MGI:3645047]	0.0235535	0.743079	1.49748	mMC020186	2993.56	2887.48	2207.19	3590.35	4418.64	4038.39	2672.08	4001.39
Tas2r109	taste receptor, type 2, member 109 [Source:MGI Symbol;Acc:MGI:2681214]	0.0235799	0.743079	1.30174	mMC019703	75.5413	89.4015	83.249	109.809	96.6793	116.817	82.5346	107.438
Prl2c3	prolactin family 2, subfamily c, member 3 [Source:MGI Symbol;Acc:MGI:1341833]	0.0236817	0.743079	26.8112	mMR001415	343.81	661.952	38.3384	3509.95	10667.3	4491.31	205.87	5519.62
Zc2hc1a	zinc finger, C2HC-type containing 1A [Source:MGI Symbol;Acc:MGI:1914556]	0.0237099	0.743079	0.59678	mMC019503	6161.46	8216.38	8051.06	4782.56	3549.51	5103.07	7414.33	4424.73
Hhat	hedgehog acyltransferase [Source:MGI Symbol;Acc:MGI:2444681]	0.0237441	0.743079	0.606013	mMC010719	158.83	177.852	164.307	128.437	100.625	79.9275	166.808	101.088
Rnf7	ring finger protein 7 [Source:MGI Symbol;Acc:MGI:1337096]	0.0237454	0.743079	0.603157	mMC006208	13263.3	10026.3	9252.69	5708.09	6124.34	7723.25	10715.7	6463.24
Gtf2f2	general transcription factor IIF, polypeptide 2 [Source:MGI Symbol;Acc:MGI:1915955]	0.0237609	0.743079	0.507366	mMC006753	2731.11	2781.91	4149.31	2087.34	1456.11	1354.67	3159.02	1602.78
Ttc33	tetratricopeptide repeat domain 33 [Source:MGI Symbol;Acc:MGI:1914765]	0.0238034	0.743079	2.05988	mMA032140	339.936	278.666	351.618	461.785	716.216	880.228	321.749	662.765
Krt6b	keratin 6B [Source:MGI Symbol;Acc:MGI:1333768]	0.0238362	0.743079	1.35439	mMC021828	66.825	72.2821	55.8645	87.2586	93.7198	81.977	64.6202	87.5206
Fkbp14	FK506 binding protein 14 [Source:MGI Symbol;Acc:MGI:2387639]	0.0238555	0.743079	0.584442	mMC022216	6351.28	7183.51	5531.68	4754.13	3464.67	3058.77	6319.53	3693.4
E030030I06Rik	RIKEN cDNA E030030I06 gene [Source:MGI Symbol;Acc:MGI:2442914]	0.023889	0.743079	1.95431	mMC024320	66.825	97.0102	75.5813	200.009	117.396	155.756	78.8358	154.069
Get4	golgi to ER traffic protein 4 [Source:MGI Symbol;Acc:MGI:1914854]	0.0239114	0.743079	1.34187	mMC020298	3827.42	3481.9	4240.22	4881.58	5808.65	4815.12	3837.4	5149.29
Ago3	argonaute RISC catalytic subunit 3 [Source:MGI Symbol;Acc:MGI:2446634]	0.0239417	0.743079	0.756555	mMA031925	46.4869	53.2605	51.4829	33.3348	41.434	39.9638	50.3269	38.075
Sytl2	synaptotagmin-like 2 [Source:MGI Symbol;Acc:MGI:1933366]	0.0239723	0.743079	0.371021	mMA034474	45.5185	47.554	84.3444	23.5304	27.6227	14.346	56.7297	21.0479
Sfrp4	secreted frizzled-related protein 4 [Source:MGI Symbol;Acc:MGI:892010]	0.0240474	0.743079	0.0851679	mMC021485	899.716	2965.47	2611.39	150.987	463.666	61.4827	1909.96	162.667
Irx5	Iroquois related homeobox 5 (Drosophila) [Source:MGI Symbol;Acc:MGI:1859086]	0.0241053	0.743079	4.86861	mMC007671	72.6358	143.613	67.9137	206.872	718.189	550.27	89.1458	434.016
Faap20	Fanconi anemia core complex associated protein 20 [Source:MGI Symbol;Acc:MGI:1914763]	0.0241215	0.743079	0.438838	mMC003995	1479.83	1484.64	1942.11	662.774	511.019	1064.68	1621.94	711.77
4933427D14Rik	RIKEN cDNA 4933427D14 gene [Source:MGI Symbol;Acc:MGI:1921727]	0.0241443	0.743079	1.41886	mMC011989	556.875	637.224	617.795	909.843	960.874	716.274	602.973	855.534
Mdm1	transformed mouse 3T3 cell double minute 1 [Source:MGI Symbol;Acc:MGI:96951]	0.0241716	0.743079	10.6774	mMA033590	107.501	150.271	164.307	400.017	3231.85	2499.27	138.457	1478.36
		0.0241981	0.743079	2.3728	mMC012840	215.971	139.809	139.113	324.524	566.265	305.364	161.349	382.849
Copa	coatomer protein complex subunit alpha [Source:MGI Symbol;Acc:MGI:1334462]	0.0243271	0.743079	1.53542	mMC025772	8773.44	9062.84	11072.1	14412.4	12572.3	17587.1	9584.18	14715.7
Mycbp2	MYC binding protein 2 [Source:MGI Symbol;Acc:MGI:2179432]	0.0243431	0.743079	0.308835	mMC002137	1081.79	883.553	1415.23	543.161	380.798	192.646	1105.95	341.555
Ndufs7	NADH dehydrogenase (ubiquinone) Fe-S protein 7 [Source:MGI Symbol;Acc:MGI:1922656]	0.0243982	0.743079	1.45801	mMC018403	5141.65	4318.85	4580.89	7147.37	5675.47	7772.44	4668.1	6806.15
Rgs9bp	regulator of G-protein signalling 9 binding protein [Source:MGI Symbol;Acc:MGI:2384418]	0.0244023	0.743079	1.40525	mMC007190	56.1717	43.7497	56.9598	67.65	78.9219	72.7545	51.9223	72.964
Col8a1	collagen, type VIII, alpha 1 [Source:MGI Symbol;Acc:MGI:88463]	0.0244056	0.743079	0.425188	mMR031012	5499.99	3687.34	5138.44	2968.75	1851.71	1457.14	4705.82	2000.86
Pigh	phosphatidylinositol glycan anchor biosynthesis, class H [Source:MGI Symbol;Acc:MGI:99463]	0.0245328	0.743079	0.55548	mMR029766	200.475	150.271	169.784	127.456	79.9084	86.0758	172.297	95.7073
Slit3	slit homolog 3 (Drosophila) [Source:MGI Symbol;Acc:MGI:1315202]	0.0245879	0.743079	0.170426	mMC004842	1970.85	1838.44	5067.24	803.956	517.925	218.264	2638.1	449.601
Gmip	Gem-interacting protein [Source:MGI Symbol;Acc:MGI:1926066]	0.0246034	0.743079	2.15678	mMC004562	356.4	340.487	242.079	475.511	886.885	698.854	308.554	665.484
Mrpl51	mitochondrial ribosomal protein L51 [Source:MGI Symbol;Acc:MGI:1913743]	0.0246198	0.743079	1.68843	mMR028748	184.979	150.271	190.596	299.032	365.014	233.634	174.329	294.344
C1qb	complement component 1, q subcomponent, beta polypeptide [Source:MGI Symbol;Acc:MGI:88224]	0.0246959	0.743079	0.0535023	mMC021594	1373.3	296.737	874.115	143.143	28.6092	13.3213	708.873	37.9263
Gm6473	predicted gene 6473 [Source:MGI Symbol;Acc:MGI:3645176]	0.02477	0.743079	1.4865	mMA034556	530.726	412.769	383.384	584.339	703.392	671.186	437.929	650.981
Mxra7	matrix-remodelling associated 7 [Source:MGI Symbol;Acc:MGI:1914872]	0.0247947	0.743079	0.601892	mMA034733	686.651	527.849	711.998	477.471	343.31	343.278	636.661	383.201
		0.0248802	0.743079	1.22021	mMC011542	92.0054	101.766	89.8213	105.887	120.356	119.891	94.3911	115.177
Sobp	sine oculis-binding protein homolog (Drosophila) [Source:MGI Symbol;Acc:MGI:1924427]	0.0248817	0.743079	0.256173	mMC010329	255.678	220.651	349.427	141.183	42.4205	55.3344	270.138	69.2018
Adamts12	a disintegrin-like and metallopeptidase (reprolysin type) with thrombospondin type 1 motif, 12 [Source:MGI Symbol;Acc:MGI:2146046]	0.0250014	0.743079	0.219065	mMR030447	427.099	543.067	576.171	220.598	124.302	51.2356	511.263	112
A430005L14Rik	RIKEN cDNA A430005L14 gene [Source:MGI Symbol;Acc:MGI:2140680]	0.0250082	0.743079	0.698664	mMC022709	370.927	332.878	370.239	301.974	220.981	233.634	357.562	249.816
Cdon	cell adhesion molecule-related/down-regulated by oncogenes [Source:MGI Symbol;Acc:MGI:1926387]	0.0250395	0.743079	0.498921	mMC022489	64.888	64.6734	85.4398	47.0608	25.6496	36.8896	71.0423	35.4445
Gphn	gephyrin [Source:MGI Symbol;Acc:MGI:109602]	0.0251436	0.743079	0.632805	mMR030859	472.617	486.953	537.832	371.585	246.631	342.254	498.365	315.368
Bcl2a1a	B cell leukemia/lymphoma 2 related protein A1a [Source:MGI Symbol;Acc:MGI:102687]	0.02517	0.743079	0.223612	mMR026458	121.06	63.7224	117.206	29.413	33.5418	10.2471	96.6971	21.6227
Jmjd1c	jumonji domain containing 1C [Source:MGI Symbol;Acc:MGI:1918614]	0.0252059	0.743079	1.46929	mMC017820	299.26	280.569	320.947	382.369	538.642	415.008	299.806	440.501
Nmd3	NMD3 homolog (S. cerevisiae) [Source:MGI Symbol;Acc:MGI:2140103]	0.0252211	0.743079	3.04621	mMC014575	160.767	150.271	94.2028	293.15	688.594	318.685	131.536	400.687
Zc2hc1a	zinc finger, C2HC-type containing 1A [Source:MGI Symbol;Acc:MGI:1914556]	0.0252236	0.743079	0.653911	mMC013305	6503.33	7809.32	8623.94	5512	4155.24	5346.95	7594.25	4965.97
Hist1h1c	histone cluster 1, H1c [Source:MGI Symbol;Acc:MGI:1931526]	0.0253093	0.743079	0.574958	mMC010699	9916.24	12557.1	13712	6681.66	8658.72	5609.27	11952.1	6871.97
Hoxa7	homeobox A7 [Source:MGI Symbol;Acc:MGI:96179]	0.025313	0.743079	0.151637	mMR029245	1403.32	1421.86	2763.65	594.143	297.93	108.619	1766.71	267.899
Tpbgl	trophoblast glycoprotein-like [Source:MGI Symbol;Acc:MGI:3646425]	0.0253192	0.743079	0.350205	mMC025619	78.4467	89.4015	178.547	50.0021	37.4879	28.6919	107.785	37.7468
Nasp	nuclear autoantigenic sperm protein (histone-binding) [Source:MGI Symbol;Acc:MGI:1355328]	0.025377	0.743079	1.76169	mMC019162	283.764	232.064	230.03	325.504	523.844	485.713	247.428	435.893
Ankrd27	ankyrin repeat domain 27 (VPS9 domain) [Source:MGI Symbol;Acc:MGI:2444103]	0.0254052	0.743079	0.666973	mMC004974	860.977	701.897	742.669	622.576	457.747	467.269	765.632	510.656
Nrbp1	nuclear receptor binding protein 1 [Source:MGI Symbol;Acc:MGI:2183436]	0.0254176	0.743079	0.751027	mMC023081	2605.21	2693.46	2589.48	1715.76	1972.06	2274.86	2628.99	1974.44
Eda2r	ectodysplasin A2 receptor [Source:MGI Symbol;Acc:MGI:2442860]	0.0254264	0.743079	1.81071	mMR028575	380.612	386.138	297.944	475.511	713.257	766.485	352.468	638.219
Kansl2	KAT8 regulatory NSL complex subunit 2 [Source:MGI Symbol;Acc:MGI:1916862]	0.0254785	0.743079	1.58345	mMC024756	3731.54	3841.41	2817.32	4747.26	6407.47	5271.12	3430.88	5432.64
Moap1	modulator of apoptosis 1 [Source:MGI Symbol;Acc:MGI:1915555]	0.0255209	0.743079	0.601887	mMC021558	288.606	342.389	270.559	207.852	201.251	139.361	299.017	179.974
		0.0255346	0.743079	1.39873	mMC025915	342.841	308.15	247.556	425.508	411.38	408.86	296.831	415.186
Kng1	kininogen 1 [Source:MGI Symbol;Acc:MGI:1097705]	0.0257002	0.743079	0.0955122	mMC018864	1612.52	2453.79	14301.3	425.508	392.637	295.117	3839.18	366.689
Cacnb2	calcium channel, voltage-dependent, beta 2 subunit [Source:MGI Symbol;Acc:MGI:894644]	0.0257363	0.743079	1.30385	mMC024864	75.5413	88.4504	73.3906	93.1413	109.504	106.57	78.8572	102.818
Slamf9	SLAM family member 9 [Source:MGI Symbol;Acc:MGI:1923692]	0.0257397	0.743079	0.229573	mMC010229	185.948	91.3037	202.646	68.6304	24.6631	24.5931	150.964	34.6571
Tagap1	T cell activation GTPase activating protein 1 [Source:MGI Symbol;Acc:MGI:1919786]	0.0258457	0.743079	1.44672	mMC019553	366.085	409.915	389.956	653.95	585.009	463.17	388.237	561.671
Tbc1d7	TBC1 domain family, member 7 [Source:MGI Symbol;Acc:MGI:1914296]	0.0258953	0.743079	1.34633	mMA033548	826.112	926.352	722.952	1025.53	1207.51	1090.29	820.934	1105.25
		0.0259695	0.743079	1.48542	mMC001986	45.5185	59.918	49.2922	68.6304	72.0162	89.1499	51.228	76.095
Slc43a1	solute carrier family 43, member 1 [Source:MGI Symbol;Acc:MGI:1931352]	0.0259971	0.743079	0.142146	mMC010127	297.323	435.595	406.387	160.791	29.5957	31.7661	374.757	53.2703
		0.0260929	0.743079	1.72509	mMA034080	65.8565	75.1353	46.006	113.73	93.7198	109.644	61.0594	105.333
Baiap2	brain-specific angiogenesis inhibitor 1-associated protein 2 [Source:MGI Symbol;Acc:MGI:2137336]	0.0261441	0.743079	2.46204	mMA031850	502.64	609.642	788.675	983.376	2067.75	1773.78	622.888	1533.58
Afap1l1	actin filament associated protein 1-like 1 [Source:MGI Symbol;Acc:MGI:2147199]	0.0262054	0.743079	0.321761	mMC017413	36.8022	66.5756	107.347	25.4913	19.7305	17.4201	64.0708	20.6155
Cmtm6	CKLF-like MARVEL transmembrane domain containing 6 [Source:MGI Symbol;Acc:MGI:2447165]	0.0262369	0.743079	0.58529	mMC012703	3793.53	2308.27	2750.5	1673.6	1868.48	1544.24	2887.89	1690.25
Gtf2ird1	general transcription factor II I repeat domain-containing 1 [Source:MGI Symbol;Acc:MGI:1861942]	0.0262461	0.743079	1.57099	mMA033300	3593.05	3957.44	3151.41	4491.37	5873.76	6585.82	3551.9	5580.01
Ebag9	estrogen receptor-binding fragment-associated gene 9 [Source:MGI Symbol;Acc:MGI:1859920]	0.0263019	0.743079	1.60947	mMA031705	181.105	192.118	220.172	248.05	343.31	375.045	197.13	317.275
Arfip1	ADP-ribosylation factor interacting protein 1 [Source:MGI Symbol;Acc:MGI:1277120]	0.0263083	0.743079	0.462062	mMR029604	2881.22	2570.77	1761.37	1008.87	850.384	1500.18	2354.13	1087.75
Usp25	ubiquitin specific peptidase 25 [Source:MGI Symbol;Acc:MGI:1353655]	0.0263311	0.743079	0.594879	mMC018484	1811.05	2080.96	1884.06	1177.5	1447.23	877.153	1922.04	1143.38
Cwc27	CWC27 spliceosome-associated protein [Source:MGI Symbol;Acc:MGI:1914535]	0.0263318	0.743079	0.46683	mMC005205	276.016	441.301	207.027	131.378	139.1	140.386	293.246	136.896
Dnajc7	DnaJ heat shock protein family (Hsp40) member C7 [Source:MGI Symbol;Acc:MGI:1928373]	0.0263439	0.743079	1.66518	mMC001993	4205.13	5761.64	5848.24	7159.13	10136.5	9015.42	5213.35	8681.17
Zfp81	zinc finger protein 81 [Source:MGI Symbol;Acc:MGI:1890752]	0.0263791	0.743079	1.71877	mMC012962	212.097	149.32	239.889	334.328	301.876	382.218	196.586	337.886
Nucb2	nucleobindin 2 [Source:MGI Symbol;Acc:MGI:1858179]	0.0263983	0.743079	0.623349	mMC010896	2670.09	2798.08	2336.45	1725.56	1934.57	1266.54	2594.06	1617.01
Prtn3	proteinase 3 [Source:MGI Symbol;Acc:MGI:893580]	0.0264477	0.743079	2.19425	mMC011772	1518.57	1858.41	2707.78	3404.07	4116.76	5760.93	1969.69	4321.98
Ccdc80	coiled-coil domain containing 80 [Source:MGI Symbol;Acc:MGI:1915146]	0.0265395	0.743079	0.332895	mMR031136	18177.4	13188.6	25301.1	10174.9	4925.71	4464.67	18237.1	6071.05
		0.0265913	0.743079	2.12229	mMC017250	212.097	138.858	261.796	349.035	406.448	519.529	197.555	419.271
		0.0265934	0.743079	4.22672	mMC006961	30.9913	34.2389	29.5753	59.8065	161.79	244.906	31.5425	133.321
Slc12a8	solute carrier family 12 (potassium/chloride transporters), member 8 [Source:MGI Symbol;Acc:MGI:2443672]	0.0267639	0.743079	2.94093	mMR028695	144.303	211.14	186.215	347.074	447.882	928.389	178.356	524.532
Ptgs1	prostaglandin-endoperoxide synthase 1 [Source:MGI Symbol;Acc:MGI:97797]	0.0268334	0.743079	2.21751	mMC002692	528.789	431.79	312.184	665.715	959.888	1216.33	414.625	919.434
		0.0268399	0.743079	1.49455	mMC010929	92.9739	121.738	97.489	142.163	142.059	182.399	103.335	154.44
Triobp	TRIO and F-actin binding protein [Source:MGI Symbol;Acc:MGI:1349410]	0.0268798	0.743079	1.54163	mMA032982	10400.5	7720.87	9888.01	13330	12860.3	16970.3	9259.97	14275.5
Hoxc8	homeobox C8 [Source:MGI Symbol;Acc:MGI:96198]	0.026904	0.743079	0.441355	mMR029967	219.844	140.76	194.978	119.613	65.1106	66.6063	182.051	80.3492
		0.0269263	0.743079	1.67543	mMC016653	5928.05	5774.96	6204.24	7604.25	10314.1	12736.1	5966.46	9996.36
Pum1	pumilio RNA-binding family member 1 [Source:MGI Symbol;Acc:MGI:1931749]	0.0269633	0.743079	0.733668	mMC012333	3321.88	3727.28	4493.26	2683.45	2833.3	2889.69	3817.5	2800.78
H2-M9	histocompatibility 2, M region locus 9 [Source:MGI Symbol;Acc:MGI:1276570]	0.0271196	0.743079	1.46398	mMC017489	61.9826	50.4072	55.8645	86.2782	68.0701	93.2488	55.8855	81.8151
		0.0271701	0.743079	0.200363	mMC015194	296.354	665.756	996.797	62.7478	160.803	156.781	581.537	116.519
Ick	intestinal cell kinase [Source:MGI Symbol;Acc:MGI:1934157]	0.0272454	0.743079	0.740481	mMR030419	499.735	428.937	427.199	333.348	294.971	378.119	450.735	333.76
Igf1	insulin-like growth factor 1 [Source:MGI Symbol;Acc:MGI:96432]	0.0272522	0.743079	0.197692	mMA031644	1819.77	1363.85	1574.06	783.367	227.887	169.077	1574.96	311.356
		0.0272523	0.743079	1.79297	mMC017176	82.3206	96.0591	113.92	131.378	213.089	185.473	96.5788	173.163
Sin3b	transcriptional regulator, SIN3B (yeast) [Source:MGI Symbol;Acc:MGI:107158]	0.0273103	0.743079	2.38339	mMR030674	114.28	77.0375	92.0121	144.124	242.685	313.562	93.2194	222.178
Spon1	spondin 1, (f-spondin) extracellular matrix protein [Source:MGI Symbol;Acc:MGI:2385287]	0.0273254	0.743079	0.14568	mMC020210	32.9282	119.836	194.978	11.7652	19.7305	10.2471	91.632	13.3489
Mrpl3	mitochondrial ribosomal protein L3 [Source:MGI Symbol;Acc:MGI:2137204]	0.0273385	0.743079	1.27235	mMC012330	4287.45	3726.33	3566.56	4496.27	5009.57	5210.66	3848.07	4896.08
Mrpl10	mitochondrial ribosomal protein L10 [Source:MGI Symbol;Acc:MGI:1333801]	0.027417	0.743079	1.45405	mMC012949	1645.44	1483.68	1233.4	2146.17	1838.88	2345.57	1444.03	2099.69
Loxl2	lysyl oxidase-like 2 [Source:MGI Symbol;Acc:MGI:2137913]	0.0274295	0.743079	0.42999	mMC005039	7481.49	7929.15	4779.15	1940.28	3227.91	3598.79	6569.34	2824.75
Cr1l	complement component (3b/4b) receptor 1-like [Source:MGI Symbol;Acc:MGI:88513]	0.0274419	0.743079	0.629042	mMR027808	714.737	957.737	706.521	501.002	576.13	417.058	784.945	493.763
Dbt	dihydrolipoamide branched chain transacylase E2 [Source:MGI Symbol;Acc:MGI:105386]	0.0275831	0.743079	0.619898	mMA033253	247.93	259.645	235.507	201.969	130.221	137.311	247.498	153.423
Tcf20	transcription factor 20 [Source:MGI Symbol;Acc:MGI:108399]	0.0275936	0.743079	1.95403	mMR030698	848.386	707.603	640.798	994.16	1761.93	1638.51	727.28	1421.12
Kng1	kininogen 1 [Source:MGI Symbol;Acc:MGI:1097705]	0.0276236	0.743079	0.0761955	mMC010135	136.555	131.249	1287.07	25.4913	21.7035	18.4448	284.666	21.6903
Mllt10	myeloid/lymphoid or mixed-lineage leukemia (trithorax homolog, Drosophila); translocated to, 10 [Source:MGI Symbol;Acc:MGI:1329038]	0.0277091	0.743079	1.23177	mMC020281	147.209	155.977	156.64	173.537	183.493	211.091	153.214	188.724
Snrpa	small nuclear ribonucleoprotein polypeptide A [Source:MGI Symbol;Acc:MGI:1855690]	0.0277267	0.743079	1.30417	mMR030457	4704.86	4079.18	3662.96	5173.75	5277.9	5710.72	4127.15	5382.52
Flnc	filamin C, gamma [Source:MGI Symbol;Acc:MGI:95557]	0.0278395	0.743079	2.20033	mMA035114	265.363	202.58	146.781	327.465	453.801	565.641	199.084	438.05
Syne1	spectrin repeat containing, nuclear envelope 1 [Source:MGI Symbol;Acc:MGI:1927152]	0.0278508	0.743079	1.29689	mMR029913	151.083	161.684	175.261	201.969	238.739	193.671	162.376	210.583
Pdxk	pyridoxal (pyridoxine, vitamin B6) kinase [Source:MGI Symbol;Acc:MGI:1351869]	0.0278643	0.743079	1.7604	mMC023951	599.488	398.502	469.919	771.602	1074.32	738.817	482.405	849.223
Fbxw9	F-box and WD-40 domain protein 9 [Source:MGI Symbol;Acc:MGI:1915878]	0.0279197	0.743079	1.47689	mMC007095	856.134	856.923	747.05	1118.68	1058.54	1490.96	818.36	1208.63
Rapgef6	Rap guanine nucleotide exchange factor (GEF) 6 [Source:MGI Symbol;Acc:MGI:2384761]	0.0279796	0.743079	0.816257	mMC019884	118.154	119.836	110.634	85.2978	102.598	97.3476	116.138	94.7985
Klf12	Kruppel-like factor 12 [Source:MGI Symbol;Acc:MGI:1333796]	0.0280429	0.743079	0.712435	mMC012382	62.9511	52.3094	54.7691	46.0804	34.5283	40.9885	56.4988	40.2517
Eif5b	eukaryotic translation initiation factor 5B [Source:MGI Symbol;Acc:MGI:2441772]	0.0280849	0.743079	1.17624	mMC022285	13490.9	14616.2	13005.5	15632	17218.8	15504.9	13687.8	16100.1
Ppm1b	protein phosphatase 1B, magnesium dependent, beta isoform [Source:MGI Symbol;Acc:MGI:101841]	0.0281347	0.743079	0.441025	mMC008032	167.547	252.036	134.732	104.906	76.9489	60.458	178.521	78.7323
		0.0281621	0.743079	1.32173	mMR028342	184.979	175.95	191.692	277.463	211.116	245.931	184.093	243.321
Pde1a	phosphodiesterase 1A, calmodulin-dependent [Source:MGI Symbol;Acc:MGI:1201792]	0.0282331	0.743079	0.21127	mMR026969	3734.45	3005.41	3930.23	1676.54	714.243	347.377	3533.32	746.484
Acbd5	acyl-Coenzyme A binding domain containing 5 [Source:MGI Symbol;Acc:MGI:1921409]	0.0283069	0.743079	0.472058	mMC014064	172.389	153.124	133.637	101.965	73.9893	49.1862	152.227	71.8601
Homer1	homer scaffolding protein 1 [Source:MGI Symbol;Acc:MGI:1347345]	0.0283078	0.743079	1.81136	mMC015629	236.309	208.287	182.929	303.935	515.952	341.229	208.037	376.83
Irs4	insulin receptor substrate 4 [Source:MGI Symbol;Acc:MGI:1338009]	0.0283238	0.743079	1.67534	mMR026738	57.1402	58.0159	54.7691	71.5717	98.6524	120.916	56.625	94.8661
Nrp1	neuropilin 1 [Source:MGI Symbol;Acc:MGI:106206]	0.0283436	0.743079	0.406267	mMR001211	11303.1	7208.23	14601.4	5741.42	4378.19	3173.53	10596	4304.8
Adam8	a disintegrin and metallopeptidase domain 8 [Source:MGI Symbol;Acc:MGI:107825]	0.0284404	0.743079	0.37302	mMC009443	276.016	183.558	248.652	129.417	96.6793	52.2603	232.684	86.7959
Denr	density-regulated protein [Source:MGI Symbol;Acc:MGI:1915434]	0.0284801	0.743079	1.63472	mMC006979	293.449	309.101	308.898	382.369	632.362	506.208	303.726	496.508
		0.0285562	0.743079	0.585521	mMC002187	1558.28	1266.84	910.262	754.934	676.755	706.027	1215.75	711.848
Tfap2a	transcription factor AP-2, alpha [Source:MGI Symbol;Acc:MGI:104671]	0.0285582	0.743079	3.0707	mMR026975	38.7391	41.8475	25.1938	59.8065	160.803	122.965	34.438	105.749
Rfwd3	ring finger and WD repeat domain 3 [Source:MGI Symbol;Acc:MGI:2384584]	0.028577	0.743079	1.41567	mMR030881	426.13	401.356	340.664	468.648	601.78	586.135	387.673	548.817
Kansl2	KAT8 regulatory NSL complex subunit 2 [Source:MGI Symbol;Acc:MGI:1916862]	0.0286052	0.743079	1.8667	mMR001195	337.999	438.448	521.402	675.519	1044.73	712.175	425.927	795.077
		0.0286115	0.743079	1.37962	mMR026208	200.475	174.999	148.972	257.854	221.968	239.783	173.54	239.42
Cdc7	cell division cycle 7 (S. cerevisiae) [Source:MGI Symbol;Acc:MGI:1309511]	0.0286261	0.743079	2.40114	mMA032498	50.3608	55.1626	31.7661	86.2782	158.83	89.1499	44.5212	106.902
Mrpl44	mitochondrial ribosomal protein L44 [Source:MGI Symbol;Acc:MGI:1916413]	0.0286378	0.743079	2.19055	mMC015932	297.323	421.328	301.23	847.095	953.969	490.837	335.415	734.741
Fam20a	family with sequence similarity 20, member A [Source:MGI Symbol;Acc:MGI:2388266]	0.0286464	0.743079	0.462705	mMC009015	859.04	738.038	1285.98	331.387	423.219	575.888	934.204	432.261
Ptpra	protein tyrosine phosphatase, receptor type, A [Source:MGI Symbol;Acc:MGI:97808]	0.0287431	0.743079	0.734922	mMC009541	5420.57	5319.39	6321.45	3644.27	4217.39	4707.53	5669.89	4166.93
Pax1	paired box 1 [Source:MGI Symbol;Acc:MGI:97485]	0.0288137	0.743079	0.0963285	mMC023938	153.019	155.026	542.214	56.8652	24.6631	8.1977	234.301	22.5698
Fxn	frataxin [Source:MGI Symbol;Acc:MGI:1096879]	0.0288679	0.743079	1.99775	mMC017284	125.902	166.439	107.347	189.224	315.688	300.241	131.027	261.759
Sytl2	synaptotagmin-like 2 [Source:MGI Symbol;Acc:MGI:1933366]	0.0289211	0.743079	0.304117	mMC010102	240.182	284.373	288.085	84.3173	148.965	44.0626	269.971	82.1027
Slc2a4rg-ps	Slc2a4 regulator, pseudogene [Source:MGI Symbol;Acc:MGI:3651388]	0.0290289	0.743079	2.34601	mMC002270	48.4239	35.19	49.2922	66.6695	146.992	110.669	43.7944	102.742
Irf3	interferon regulatory factor 3 [Source:MGI Symbol;Acc:MGI:1859179]	0.0290458	0.743079	0.879595	mMA034093	2074.48	1832.73	2013.31	1765.76	1711.62	1723.57	1970.79	1733.49
		0.0290877	0.743079	1.73133	mMC014106	132.681	87.4994	145.686	228.441	196.318	195.72	119.145	206.28
Slc2a4	solute carrier family 2 (facilitated glucose transporter), member 4 [Source:MGI Symbol;Acc:MGI:95758]	0.0291445	0.743079	0.90543	mMC005557	108.47	114.13	112.824	104.906	102.598	96.3229	111.781	101.21
Colec12	collectin sub-family member 12 [Source:MGI Symbol;Acc:MGI:2152907]	0.0291543	0.743079	0.289282	mMC020190	1789.75	1420.91	2588.39	1047.1	384.744	395.539	1874.11	542.147
Tmem129	transmembrane protein 129 [Source:MGI Symbol;Acc:MGI:1915616]	0.0291766	0.743079	0.443355	mMC020153	3203.72	1832.73	2679.3	1402.02	778.367	1256.3	2505.68	1110.91
Atp8b1	ATPase, class I, type 8B, member 1 [Source:MGI Symbol;Acc:MGI:1859665]	0.0292158	0.743079	0.294361	mMC022933	104.596	189.265	133.637	72.5521	39.461	23.5684	138.304	40.7114
Snx21	sorting nexin family member 21 [Source:MGI Symbol;Acc:MGI:1917729]	0.0292503	0.743079	1.78667	mMC023729	201.443	166.439	217.981	255.893	426.178	382.218	194.063	346.726
Rarg	retinoic acid receptor, gamma [Source:MGI Symbol;Acc:MGI:97858]	0.0293492	0.743079	1.42057	mMC016022	759.287	683.826	730.62	840.232	1149.3	1126.16	723.904	1028.36
AC084822.2		0.0294806	0.743079	0.801035	mMC025099	6131.43	7081.74	5729.94	4914.92	4922.75	5285.46	6289.52	5038.13
Sema3d	sema domain, immunoglobulin domain (Ig), short basic domain, secreted, (semaphorin) 3D [Source:MGI Symbol;Acc:MGI:1860118]	0.0294818	0.743079	0.148111	mMR028819	675.997	214.944	387.765	145.104	38.4744	32.7908	383.366	56.7808
Zfp260	zinc finger protein 260 [Source:MGI Symbol;Acc:MGI:1347071]	0.029523	0.743079	0.544016	mMR029684	684.714	666.707	875.21	553.945	341.337	340.204	736.522	400.679
Gsta3	glutathione S-transferase, alpha 3 [Source:MGI Symbol;Acc:MGI:95856]	0.0297063	0.743079	3.08108	mMC011094	527.82	1002.44	867.542	1908.91	1699.78	4137.79	771.397	2376.74
Arl11	ADP-ribosylation factor-like 11 [Source:MGI Symbol;Acc:MGI:2444054]	0.0297576	0.743079	0.386095	mMC011561	155.925	77.9886	162.116	51.963	35.5149	61.4827	125.389	48.4119
Vbp1	von Hippel-Lindau binding protein 1 [Source:MGI Symbol;Acc:MGI:1333804]	0.0297842	0.743079	0.779646	mMC024641	6220.53	5210.97	6370.74	4254.1	4735.31	4858.16	5910.79	4608.32
Ush1c	Usher syndrome 1C [Source:MGI Symbol;Acc:MGI:1919338]	0.0298283	0.743079	1.69804	mMC006062	65.8565	48.5051	40.5291	97.063	74.9758	87.1005	50.5884	85.9011
		0.0298295	0.743079	1.74126	mMC016218	724.421	640.077	962.841	1055.93	1459.07	1529.89	764.292	1330.83
		0.0299045	0.743079	1.52267	mMC007484	103.627	82.744	84.3444	110.789	150.938	152.682	89.7612	136.677
Arhgap29	Rho GTPase activating protein 29 [Source:MGI Symbol;Acc:MGI:2443818]	0.0299074	0.743079	0.586104	mMC016641	201.443	268.205	315.47	161.772	169.682	125.015	257.351	150.834
Rap1gap	Rap1 GTPase-activating protein [Source:MGI Symbol;Acc:MGI:109338]	0.0300266	0.743079	1.78928	mMC026137	51.3293	42.7986	47.1014	89.2195	61.1645	108.619	46.9472	84.0019
Tspan6	tetraspanin 6 [Source:MGI Symbol;Acc:MGI:1926264]	0.0300803	0.743079	0.209595	mMA034253	2081.26	3058.67	7390.54	1328.49	505.1	645.569	3610.04	756.646
Nudt9	nudix (nucleoside diphosphate linked moiety X)-type motif 9 [Source:MGI Symbol;Acc:MGI:1921417]	0.0300813	0.743079	1.37013	mMR029888	1479.83	1344.83	1553.25	1683.41	2136.81	2210.3	1456.71	1995.89
Hnrnph1	heterogeneous nuclear ribonucleoprotein H1 [Source:MGI Symbol;Acc:MGI:1891925]	0.030135	0.743079	1.39034	mMA031651	3561.09	3491.41	2953.15	4597.26	4029.95	5326.45	3323.71	4621.1
Rac1	RAS-related C3 botulinum substrate 1 [Source:MGI Symbol;Acc:MGI:97845]	0.0301744	0.743079	1.16675	mMC011228	13993.5	14637.1	13811.7	15245.8	17708.1	16643.4	14143	16501.4
Sema7a	sema domain, immunoglobulin domain (Ig), and GPI membrane anchor, (semaphorin) 7A [Source:MGI Symbol;Acc:MGI:1306826]	0.0303064	0.743079	0.485292	mMC022561	1255.15	1101.35	1201.63	810.819	607.699	385.292	1184.31	574.735
Dyrk1a	dual-specificity tyrosine-(Y)-phosphorylation regulated kinase 1a [Source:MGI Symbol;Acc:MGI:1330299]	0.0303634	0.743079	0.493741	mMR026950	219.844	127.445	214.695	111.77	87.8006	73.7793	181.867	89.7949
Mum1	melanoma associated antigen (mutated) 1 [Source:MGI Symbol;Acc:MGI:1915364]	0.0303756	0.743079	1.6935	mMC021068	4731.98	4080.13	3901.75	5668.87	9452.87	6827.66	4223.37	7152.27
Mgea5	meningioma expressed antigen 5 (hyaluronidase) [Source:MGI Symbol;Acc:MGI:1932139]	0.0304083	0.743079	1.60115	mMA035319	600.456	727.576	635.321	894.156	939.171	1356.72	652.306	1044.44
		0.0304302	0.743079	0.188941	mMC017239	2426.04	851.217	4177.79	370.604	281.159	558.468	2050.98	387.514
Napb	N-ethylmaleimide sensitive fusion protein attachment protein beta [Source:MGI Symbol;Acc:MGI:104562]	0.0305113	0.743079	1.62644	mMC007862	85.226	77.0375	120.492	168.635	146.992	137.311	92.4863	150.424
Chn2	chimerin 2 [Source:MGI Symbol;Acc:MGI:1917243]	0.030626	0.743079	4.0985	mMR029724	37.7706	36.141	39.4337	65.6891	252.55	223.387	37.7579	154.751
Zfp329	zinc finger protein 329 [Source:MGI Symbol;Acc:MGI:1921283]	0.0306399	0.743079	1.16315	mMC020077	165.61	174.999	169.784	215.696	190.399	188.547	170.088	197.837
Synpo	synaptopodin [Source:MGI Symbol;Acc:MGI:1099446]	0.0306574	0.743079	2.88924	mMC023415	486.176	356.655	385.574	635.321	1463.01	1734.84	405.867	1172.65
		0.0308702	0.743079	0.470537	mMR029121	60.0456	52.3094	79.9629	32.3543	39.461	20.4942	63.0933	29.6877
Zfand6	zinc finger, AN1-type domain 6 [Source:MGI Symbol;Acc:MGI:1929510]	0.0309133	0.743079	0.718854	mMC002229	6189.54	5048.33	6825.32	4706.08	4213.44	3995.35	5974.61	4294.88
R3hcc1l	R3H domain and coiled-coil containing 1 like [Source:MGI Symbol;Acc:MGI:1196316]	0.030941	0.743079	1.50279	mMC014776	78.4467	70.3799	63.5321	85.2978	116.41	119.891	70.5243	105.984
Rad51d	RAD51 homolog D [Source:MGI Symbol;Acc:MGI:1261809]	0.030981	0.743079	1.51013	mMA035280	279.89	272.96	201.55	327.465	409.407	395.539	248.784	375.696
Lilrb4a	leukocyte immunoglobulin-like receptor, subfamily B, member 4A [Source:MGI Symbol;Acc:MGI:102701]	0.0310013	0.743079	0.0921777	mMC024950	150.114	58.0159	170.88	27.4522	13.8113	3.07414	114.17	10.5239
Ids	iduronate 2-sulfatase [Source:MGI Symbol;Acc:MGI:96417]	0.0310263	0.743079	0.39975	mMC015209	620.794	591.572	980.367	367.663	179.547	348.402	711.401	284.383
Mlkl	mixed lineage kinase domain-like [Source:MGI Symbol;Acc:MGI:1921818]	0.031055	0.743079	1.88937	mMC013413	213.065	323.367	214.695	391.193	418.286	609.704	245.477	463.797
Coro1a	coronin, actin binding protein 1A [Source:MGI Symbol;Acc:MGI:1345961]	0.0310604	0.743079	0.403539	mMC011721	229.529	150.271	234.412	65.6891	62.151	130.138	200.708	80.9933
Ehd3	EH-domain containing 3 [Source:MGI Symbol;Acc:MGI:1928900]	0.0310627	0.743079	0.281746	mMC014603	219.844	130.298	210.313	93.1413	52.2858	27.6672	181.959	51.2661
Trim37	tripartite motif-containing 37 [Source:MGI Symbol;Acc:MGI:2153072]	0.0311019	0.743079	1.71268	mMC016423	165.61	215.895	207.027	260.796	428.151	333.031	194.888	333.78
Hmx2	H6 homeobox 2 [Source:MGI Symbol;Acc:MGI:107159]	0.0312097	0.743079	1.75597	mMC004577	71.6674	122.689	79.9629	140.202	167.709	161.904	88.9212	156.143
Prps2	phosphoribosyl pyrophosphate synthetase 2 [Source:MGI Symbol;Acc:MGI:97776]	0.0312281	0.743079	2.19004	mMC005919	688.588	447.008	353.808	1026.51	1347.59	826.943	477.545	1045.84
		0.0312443	0.743079	2.05399	mMC002155	109.438	108.423	67.9137	150.987	180.534	256.178	93.057	191.138
Utp23	UTP23, small subunit (SSU) processome component, homolog (yeast) [Source:MGI Symbol;Acc:MGI:1925831]	0.0312785	0.743079	0.754555	mMC012557	644.038	688.582	622.177	453.941	451.828	577.938	651.019	491.23
Gpatch1	G patch domain containing 1 [Source:MGI Symbol;Acc:MGI:1914721]	0.0313053	0.743079	1.30576	mMC025634	109.438	123.64	99.6797	148.046	130.221	155.756	110.487	144.269
Taf6l	TAF6-like RNA polymerase II, p300/CBP-associated factor (PCAF)-associated factor [Source:MGI Symbol;Acc:MGI:2444957]	0.0314629	0.743079	1.40319	mMR028897	339.936	275.813	272.75	358.839	423.219	465.219	294.618	413.403
Pla2g6	phospholipase A2, group VI [Source:MGI Symbol;Acc:MGI:1859152]	0.0315298	0.743079	1.87437	mMC010123	460.027	290.079	306.707	562.769	574.157	834.116	344.621	645.945
Cers1	ceramide synthase 1 [Source:MGI Symbol;Acc:MGI:2136690]	0.031569	0.743079	0.451158	mMR030357	241.151	305.297	277.132	197.067	93.7198	101.446	273.253	123.28
		0.0315912	0.743079	1.28629	mMC008336	81.3521	78.9396	67.9137	93.1413	91.7467	108.619	75.8357	97.5469
Fam3b	family with sequence similarity 3, member B [Source:MGI Symbol;Acc:MGI:1270150]	0.0316212	0.743079	0.463124	mMA031997	269.237	447.008	265.082	203.93	124.302	125.015	317.159	146.884
Col4a6	collagen, type IV, alpha 6 [Source:MGI Symbol;Acc:MGI:2152695]	0.0316972	0.743079	1.46591	mMR026539	647.912	622.006	864.256	920.628	1093.07	1090.29	703.587	1031.39
		0.0317261	0.743079	0.173887	mMC003704	189.822	149.32	286.99	91.1804	28.6092	16.3954	201.114	34.9711
Hipk3	homeodomain interacting protein kinase 3 [Source:MGI Symbol;Acc:MGI:1314882]	0.0317394	0.743079	0.431704	mMC010996	820.301	1210.72	726.238	294.13	338.378	583.061	896.807	387.155
Lyz1	lysozyme 1 [Source:MGI Symbol;Acc:MGI:96902]	0.0317655	0.743079	0.170426	mMC023485	171.421	132.2	477.586	76.4739	20.717	33.8155	221.199	37.698
Nln	neurolysin (metallopeptidase M3 family) [Source:MGI Symbol;Acc:MGI:1923055]	0.0317889	0.743079	1.86727	mMA032113	93.9423	136.956	81.0582	150.987	214.076	210.066	101.41	189.36
Nox4	NADPH oxidase 4 [Source:MGI Symbol;Acc:MGI:1354184]	0.0318291	0.743079	0.215432	mMC015306	1706.46	1317.25	2757.08	864.743	353.176	202.893	1836.84	395.714
Elavl1	ELAV (embryonic lethal, abnormal vision)-like 1 (Hu antigen R) [Source:MGI Symbol;Acc:MGI:1100851]	0.0318308	0.743079	1.54337	mMC020523	145.272	195.922	228.935	290.209	293.984	280.771	186.778	288.267
Htra2	HtrA serine peptidase 2 [Source:MGI Symbol;Acc:MGI:1928676]	0.031868	0.743079	1.68263	mMC017860	1389.77	2015.34	1988.12	2417.75	3262.43	3363.1	1772.46	2982.39
Fgfr1op	Fgfr1 oncogene partner [Source:MGI Symbol;Acc:MGI:1922546]	0.0320031	0.743079	1.87566	mMC009748	385.454	362.361	211.409	539.239	617.564	585.111	309.086	579.741
Socs6	suppressor of cytokine signaling 6 [Source:MGI Symbol;Acc:MGI:1924885]	0.0320247	0.743079	1.34311	mMC004507	582.055	590.621	664.897	704.932	929.306	845.387	611.424	821.209
Cpxm2	carboxypeptidase X 2 (M14 family) [Source:MGI Symbol;Acc:MGI:1926006]	0.0320309	0.743079	0.104716	mMC009253	202.412	199.727	1016.51	45.1	68.0701	15.3707	345.087	36.1362
		0.032082	0.743079	1.52357	mMC014766	65.8565	59.918	53.6737	74.513	111.477	90.1746	59.6082	90.8171
Fam210b	family with sequence similarity 210, member B [Source:MGI Symbol;Acc:MGI:1914267]	0.0320967	0.743079	0.55711	mMC002290	459.058	275.813	361.476	233.343	208.157	162.929	357.702	199.279
H2-Q7	histocompatibility 2, Q region locus 7 [Source:MGI Symbol;Acc:MGI:95936]	0.0321186	0.743079	0.465833	mMR026466	422.256	520.241	857.684	252.952	329.499	228.511	573.283	267.054
Fbxo11	F-box protein 11 [Source:MGI Symbol;Acc:MGI:2147134]	0.032146	0.743079	0.565486	mMA034901	1371.36	1795.64	2208.29	863.763	920.427	1236.83	1758.5	994.407
Eif4a2	eukaryotic translation initiation factor 4A2 [Source:MGI Symbol;Acc:MGI:106906]	0.0321939	0.743079	1.71903	mMC005371	1544.72	1380.97	1145.77	2010.87	3086.83	2000.24	1347.03	2315.58
Dus4l	dihydrouridine synthase 4-like (S. cerevisiae) [Source:MGI Symbol;Acc:MGI:1919166]	0.0322004	0.743079	1.8712	mMC020974	362.211	213.042	203.741	468.648	422.232	520.554	250.516	468.764
Tfap2a	transcription factor AP-2, alpha [Source:MGI Symbol;Acc:MGI:104671]	0.0322581	0.743079	2.57985	mMC012617	77.4782	59.918	69.009	104.906	187.44	279.746	68.4249	176.526
Dtna	dystrobrevin alpha [Source:MGI Symbol;Acc:MGI:106039]	0.0323288	0.743079	2.99271	mMR029091	75.5413	56.1137	40.5291	111.77	141.073	292.043	55.5913	166.369
Gal	galanin [Source:MGI Symbol;Acc:MGI:95637]	0.0323554	0.743079	0.231057	mMC005635	100.722	191.167	52.5783	35.2956	24.6631	14.346	100.411	23.2006
Zhx2	zinc fingers and homeoboxes 2 [Source:MGI Symbol;Acc:MGI:2683087]	0.0324117	0.743079	0.495745	mMC020565	179.168	137.907	210.313	116.672	86.8141	62.5074	173.209	85.8676
Qser1	glutamine and serine rich 1 [Source:MGI Symbol;Acc:MGI:2138986]	0.0325062	0.743079	1.53565	mMC025328	618.857	909.232	612.318	1076.52	1134.5	1021.64	701.048	1076.57
Usp20	ubiquitin specific peptidase 20 [Source:MGI Symbol;Acc:MGI:1921520]	0.0325245	0.743079	1.52854	mMC023595	921.991	1174.58	1303.5	1683.41	1499.52	1997.16	1121.78	1714.69
Arhgef15	Rho guanine nucleotide exchange factor (GEF) 15 [Source:MGI Symbol;Acc:MGI:3045246]	0.0325344	0.743079	0.613067	mMC020647	50.3608	51.3583	69.009	37.2565	27.6227	39.9638	56.3037	34.5179
Col15a1	collagen, type XV, alpha 1 [Source:MGI Symbol;Acc:MGI:88449]	0.0325522	0.743079	0.160889	mMC021663	720.547	1555.97	454.583	246.089	155.871	55.3344	798.777	128.514
		0.0325726	0.743079	1.68278	mMC024582	119.123	110.325	107.347	255.893	175.601	149.608	112.155	188.733
Tnrc6a	trinucleotide repeat containing 6a [Source:MGI Symbol;Acc:MGI:2385292]	0.0325923	0.743079	1.1815	mMR028926	903.59	1016.7	870.828	1089.26	1144.37	1058.53	928.324	1096.82
Dsg1b	desmoglein 1 beta [Source:MGI Symbol;Acc:MGI:2664357]	0.0326875	0.743079	1.55659	mMC020482	79.4152	60.8691	70.1044	99.0239	94.7063	136.287	69.7186	108.524
4930426L09Rik	RIKEN cDNA 4930426L09 gene [Source:MGI Symbol;Acc:MGI:1921879]	0.0329355	0.743079	0.228132	mMC010358	79.4152	178.803	120.492	59.8065	20.717	16.3954	119.604	27.2855
Gucy1b3	guanylate cyclase 1, soluble, beta 3 [Source:MGI Symbol;Acc:MGI:1860604]	0.0329397	0.743079	0.111743	mMC006006	775.751	396.6	1282.69	253.932	64.1241	33.8155	733.498	81.9631
Hnrnph1	heterogeneous nuclear ribonucleoprotein H1 [Source:MGI Symbol;Acc:MGI:1891925]	0.0329859	0.743079	1.38339	mMC022317	14535.9	11476.7	13218	15861.5	17912.3	20547.5	13015.9	18006
Ddr1	discoidin domain receptor family, member 1 [Source:MGI Symbol;Acc:MGI:99216]	0.033009	0.743079	1.4911	mMC012760	918.117	892.113	1162.2	1693.21	1233.15	1511.45	983.708	1466.81
Prkar2b	protein kinase, cAMP dependent regulatory, type II beta [Source:MGI Symbol;Acc:MGI:97760]	0.0330954	0.743079	1.98829	mMA034175	660.502	895.917	518.116	1062.79	1293.33	1753.28	674.305	1340.72
Tnfaip2	tumor necrosis factor, alpha-induced protein 2 [Source:MGI Symbol;Acc:MGI:104960]	0.0331152	0.743079	0.330706	mMA034482	111.375	120.787	133.637	43.1391	70.0432	21.519	121.594	40.2117
Pls3	plastin 3 (T-isoform) [Source:MGI Symbol;Acc:MGI:104807]	0.0331324	0.743079	0.427281	mMC024546	28339.6	32572.6	35493.7	17291.9	8164.47	18103.6	31998.7	13672.4
Dynlt1-ps1	dynein light chain Tctex-type 1, pseuodogene 1 [Source:MGI Symbol;Acc:MGI:3642625]	0.033169	0.743079	1.94599	mMC005282	1877.88	2800.93	2991.49	4383.52	4037.84	6550.98	2505.83	4876.33
Nfatc2	nuclear factor of activated T cells, cytoplasmic, calcineurin dependent 2 [Source:MGI Symbol;Acc:MGI:102463]	0.0332283	0.743079	2.01049	mMA031771	2111.28	2922.67	1741.66	3702.12	3877.04	6084.74	2206.8	4436.74
Lbr	lamin B receptor [Source:MGI Symbol;Acc:MGI:2138281]	0.0333019	0.743079	1.70171	mMA032701	149.146	187.363	122.683	226.48	231.833	321.76	150.785	256.594
Mtss1	metastasis suppressor 1 [Source:MGI Symbol;Acc:MGI:2384818]	0.0333597	0.743079	0.434844	mMC017591	69.7304	59.918	130.35	40.1978	28.6092	38.9391	81.664	35.5111
Vash1	vasohibin 1 [Source:MGI Symbol;Acc:MGI:2442543]	0.0333931	0.743079	1.61327	mMA031933	48.4239	51.3583	46.006	64.7087	71.0297	104.521	48.5469	78.3192
		0.0334521	0.743079	2.26731	mMC011419	85.226	133.151	99.6797	187.263	191.386	367.872	104.194	236.239
Prkg1	protein kinase, cGMP-dependent, type I [Source:MGI Symbol;Acc:MGI:108174]	0.0334525	0.743079	0.113702	mMR028749	739.917	183.558	1006.66	139.222	33.5418	43.0379	515.165	58.5753
Krt6b	keratin 6B [Source:MGI Symbol;Acc:MGI:1333768]	0.0334561	0.743079	1.48754	mMR029114	54.2348	44.7008	64.6275	79.4152	72.0162	90.1746	53.9101	80.1936
Ppp1r14a	protein phosphatase 1, regulatory (inhibitor) subunit 14A [Source:MGI Symbol;Acc:MGI:1931139]	0.0334826	0.743079	0.385943	mMC007596	1317.13	855.972	944.219	652.969	360.081	260.277	1021.07	394.073
Tm9sf2	transmembrane 9 superfamily member 2 [Source:MGI Symbol;Acc:MGI:1915309]	0.0334992	0.743079	0.545963	mMA031516	2248.81	2159.9	1736.18	1480.46	1136.48	815.671	2035.45	1111.28
Nr2f2	nuclear receptor subfamily 2, group F, member 2 [Source:MGI Symbol;Acc:MGI:1352452]	0.0335059	0.743079	0.600033	mMC019812	237.277	213.993	348.331	163.733	168.696	138.336	260.545	156.336
Aif1	allograft inflammatory factor 1 [Source:MGI Symbol;Acc:MGI:1343098]	0.033519	0.743079	0.211996	mMA032826	188.853	45.6518	201.55	28.4326	23.6766	24.5931	120.223	25.4868
Napb	N-ethylmaleimide sensitive fusion protein attachment protein beta [Source:MGI Symbol;Acc:MGI:104562]	0.0335793	0.743079	1.3523	mMR027780	174.326	153.124	146.781	182.361	236.766	224.412	157.649	213.189
Ilf2	interleukin enhancer binding factor 2 [Source:MGI Symbol;Acc:MGI:1915031]	0.0335829	0.743079	1.37673	mMC020766	4634.17	5158.66	3817.41	6793.43	6085.87	5759.91	4502.21	6198.34
		0.0335921	0.743079	1.66534	mMC001934	60.0456	101.766	78.8675	142.163	119.369	131.163	78.4019	130.566
Foxj3	forkhead box J3 [Source:MGI Symbol;Acc:MGI:2443432]	0.0336537	0.743079	1.2813	mMC012522	173.358	203.531	197.169	216.676	258.469	261.302	190.899	244.599
Pycr1	pyrroline-5-carboxylate reductase 1 [Source:MGI Symbol;Acc:MGI:2384795]	0.0336668	0.743079	0.515723	mMC015044	177.231	154.075	148.972	81.376	117.396	58.4086	159.634	82.3271
Tdg	thymine DNA glycosylase [Source:MGI Symbol;Acc:MGI:108247]	0.0338483	0.743079	1.78801	mMC026091	860.977	587.767	514.829	1371.63	975.672	1112.84	638.685	1141.98
Rbm6	RNA binding motif protein 6 [Source:MGI Symbol;Acc:MGI:1338037]	0.0338558	0.743079	0.826783	mMA031792	426.13	463.176	449.106	340.211	409.407	359.674	445.874	368.641
Nedd9	neural precursor cell expressed, developmentally down-regulated gene 9 [Source:MGI Symbol;Acc:MGI:97302]	0.0339226	0.743079	0.272216	mMC014053	7155.11	10792.9	18234.8	5594.36	2033.23	2497.22	11208.6	3051.16
Ltbp3	latent transforming growth factor beta binding protein 3 [Source:MGI Symbol;Acc:MGI:1101355]	0.0339922	0.743079	0.717143	mMC005778	984.942	1142.25	1206.02	714.737	941.144	743.941	1107.07	793.926
Tmem30b	transmembrane protein 30B [Source:MGI Symbol;Acc:MGI:2442082]	0.0339923	0.743079	0.0383685	mMC002781	62.9511	67.5267	392.147	18.6283	4.93262	1.02471	118.57	4.54936
Itga11	integrin alpha 11 [Source:MGI Symbol;Acc:MGI:2442114]	0.034045	0.743079	0.0752726	mMR028445	35682.6	22192.5	47786	9035.68	2969.44	601.506	33572.8	2527.11
Lgr6	leucine-rich repeat-containing G protein-coupled receptor 6 [Source:MGI Symbol;Acc:MGI:2441805]	0.0341396	0.743079	0.613628	mMC019222	195.633	147.417	138.018	100.985	115.423	78.9028	158.48	97.248
Ears2	glutamyl-tRNA synthetase 2 (mitochondrial)(putative) [Source:MGI Symbol;Acc:MGI:1914667]	0.0341647	0.743079	1.24374	mMC007026	67.7934	57.0648	55.8645	74.513	78.9219	70.7051	60.011	74.638
Kif1b	kinesin family member 1B [Source:MGI Symbol;Acc:MGI:108426]	0.0341973	0.743079	0.588891	mMC015567	596.582	433.692	565.217	406.88	270.308	271.549	526.853	310.259
Lamp2	lysosomal-associated membrane protein 2 [Source:MGI Symbol;Acc:MGI:96748]	0.0342148	0.743079	0.514666	mMA033163	4587.68	5969.93	8552.74	3898.21	3024.68	2708.31	6164.38	3172.59
Cd84	CD84 antigen [Source:MGI Symbol;Acc:MGI:1336885]	0.0342222	0.743079	0.194645	mMC017459	108.47	68.4778	146.781	50.9826	11.8383	13.3213	102.922	20.0333
A630001G21Rik	RIKEN cDNA A630001G21 gene [Source:MGI Symbol;Acc:MGI:2443131]	0.0342562	0.743079	2.04378	mMC004589	45.5185	39.9454	37.243	53.9239	99.6389	107.595	40.7599	83.3042
Sirt1	sirtuin 1 [Source:MGI Symbol;Acc:MGI:2135607]	0.0343414	0.743079	0.659736	mMC005543	366.085	349.997	502.78	240.206	256.496	300.241	400.874	264.471
Nuak1	NUAK family, SNF1-like kinase, 1 [Source:MGI Symbol;Acc:MGI:1925226]	0.0343554	0.743079	0.459191	mMC021949	1346.18	1482.73	1589.4	932.393	420.259	783.905	1469.38	674.724
Wisp2	WNT1 inducible signaling pathway protein 2 [Source:MGI Symbol;Acc:MGI:1328326]	0.0343554	0.743079	0.429676	mMC006993	28750.2	15159.3	37134.5	10388.7	11388.4	10851.7	25294.9	10868.6
Tarbp2	TAR (HIV) RNA binding protein 2 [Source:MGI Symbol;Acc:MGI:103027]	0.0344129	0.743079	1.73581	mMC021487	215.002	141.711	253.033	333.348	333.445	362.748	197.549	342.906
Rnf157	ring finger protein 157 [Source:MGI Symbol;Acc:MGI:2442484]	0.0344465	0.743079	0.550279	mMC026049	225.655	213.042	190.596	101.965	90.7602	164.979	209.255	115.149
Trub2	TruB pseudouridine (psi) synthase homolog 2 (E. coli) [Source:MGI Symbol;Acc:MGI:2442186]	0.0344823	0.743079	1.73138	mMA033474	361.242	289.128	337.378	467.667	500.168	781.855	327.845	567.622
Nt5c3b	5'-nucleotidase, cytosolic IIIB [Source:MGI Symbol;Acc:MGI:1915356]	0.0345209	0.743079	2.23311	mMA035312	666.313	1060.45	522.497	1232.41	2057.89	1621.09	717.383	1602
9030617O03Rik	RIKEN cDNA 9030617O03 gene [Source:MGI Symbol;Acc:MGI:2444813]	0.0345364	0.743079	1.71396	mMC008273	183.042	130.298	175.261	224.519	264.388	354.55	161.086	276.095
Tgds	TDP-glucose 4,6-dehydratase [Source:MGI Symbol;Acc:MGI:1923605]	0.0345574	0.743079	0.442505	mMA033973	259.552	224.455	174.166	150.987	71.0297	81.977	216.49	95.7981
Golga5	golgi autoantigen, golgin subfamily a, 5 [Source:MGI Symbol;Acc:MGI:1351475]	0.0346961	0.743079	0.777561	mMC006256	3081.7	2758.13	2732.98	2530.5	2166.41	1992.04	2853.3	2218.61
S100a10	S100 calcium binding protein A10 (calpactin) [Source:MGI Symbol;Acc:MGI:1339468]	0.0347167	0.743079	2.36132	mMC016976	7177.39	8436.08	4428.63	21638.2	11127	14663.6	6448.5	15227
Bfar	bifunctional apoptosis regulator [Source:MGI Symbol;Acc:MGI:1914368]	0.0347388	0.743079	0.542973	mMA032073	357.368	381.383	215.79	192.165	163.763	149.608	308.676	167.603
Asph	aspartate-beta-hydroxylase [Source:MGI Symbol;Acc:MGI:1914186]	0.0347453	0.743079	0.300786	mMR028483	288.606	200.678	667.087	83.3369	94.7063	133.213	338.062	101.684
Pex11g	peroxisomal biogenesis factor 11 gamma [Source:MGI Symbol;Acc:MGI:1920905]	0.0347643	0.743079	0.635622	mMR029220	354.463	471.736	386.67	237.265	320.62	218.264	401.362	255.115
Nhlrc3	NHL repeat containing 3 [Source:MGI Symbol;Acc:MGI:2444520]	0.0348945	0.743079	0.729172	mMC004719	212.097	187.363	205.932	127.456	142.059	175.226	201.518	146.941
Ntn4	netrin 4 [Source:MGI Symbol;Acc:MGI:1888978]	0.0349356	0.743079	0.176328	mMC018345	951.045	1003.39	1260.78	366.682	283.132	63.5321	1063.58	187.539
Kdelr3	KDEL (Lys-Asp-Glu-Leu) endoplasmic reticulum protein retention receptor 3 [Source:MGI Symbol;Acc:MGI:2145953]	0.0349429	0.743079	0.434871	mMC016363	11288.6	4868.58	7805.69	3032.48	4044.75	2876.37	7541.96	3279.78
Dsn1	DSN1 homolog, MIS12 kinetochore complex component [Source:MGI Symbol;Acc:MGI:1914184]	0.0349578	0.743079	1.60261	mMC018525	101.69	149.32	140.209	218.637	232.82	172.152	128.644	206.166
Satb1	special AT-rich sequence binding protein 1 [Source:MGI Symbol;Acc:MGI:105084]	0.0350767	0.743079	0.131126	mMR030035	532.663	1111.81	427.199	199.028	103.585	27.6672	632.467	82.9327
Scarb1	scavenger receptor class B, member 1 [Source:MGI Symbol;Acc:MGI:893578]	0.0351663	0.743079	1.8535	mMA032047	146.24	161.684	94.2028	242.167	201.251	291.018	130.597	242.061
Bmp1	bone morphogenetic protein 1 [Source:MGI Symbol;Acc:MGI:88176]	0.0352395	0.743079	0.512543	mMC005337	803.837	860.727	1283.79	571.593	580.076	360.699	961.263	492.688
Plac8	placenta-specific 8 [Source:MGI Symbol;Acc:MGI:2445289]	0.0352449	0.743079	0.44099	mMC001101	6533.35	5482.98	9924.16	4600.2	2533.39	2616.09	7084.06	3124
Bdkrb2	bradykinin receptor, beta 2 [Source:MGI Symbol;Acc:MGI:102845]	0.0352849	0.743079	1.31346	mMC008346	44.55	53.2605	55.8645	70.5913	60.178	70.7051	50.9874	66.9699
Lix1l	Lix1-like [Source:MGI Symbol;Acc:MGI:3036267]	0.0353028	0.743079	0.635626	mMC001972	2139.37	2309.22	1540.11	1317.7	1374.23	1079.02	1966.83	1250.17
Sumo3	small ubiquitin-like modifier 3 [Source:MGI Symbol;Acc:MGI:1336201]	0.0353326	0.743079	1.50544	mMR030159	9875.57	12032.1	12380	13782.9	19681.2	18502.2	11373	17121.4
Arhgap24	Rho GTPase activating protein 24 [Source:MGI Symbol;Acc:MGI:1922647]	0.0353819	0.743079	0.766472	mMC016220	2675.9	2575.52	2472.28	1687.33	2227.57	2041.23	2573.22	1972.3
Hcn2	hyperpolarization-activated, cyclic nucleotide-gated K+ 2 [Source:MGI Symbol;Acc:MGI:1298210]	0.0354779	0.743079	1.88584	mMC002768	284.732	305.297	165.403	430.411	432.097	518.504	243.165	458.57
Wnt5b	wingless-type MMTV integration site family, member 5B [Source:MGI Symbol;Acc:MGI:98959]	0.0354804	0.743079	0.358142	mMC018255	116.217	188.314	157.735	98.0434	39.461	40.9885	151.133	54.1272
Spry1	sprouty homolog 1 (Drosophila) [Source:MGI Symbol;Acc:MGI:1345139]	0.03549	0.743079	0.555924	mMC009886	64.888	67.5267	92.0121	54.9043	38.4744	32.7908	73.8746	41.0686
Ap1ar	adaptor-related protein complex 1 associated regulatory protein [Source:MGI Symbol;Acc:MGI:2384822]	0.0356325	0.743079	1.69202	mMC004766	3420.66	3291.69	2337.54	4407.05	6363.08	4546.65	2974.61	5033.1
		0.035638	0.743079	53.0294	mMR027468	0.968478	2.85324	3.28615	9.80434	425.192	324.834	2.08627	110.634
Mrpl43	mitochondrial ribosomal protein L43 [Source:MGI Symbol;Acc:MGI:2137229]	0.0356862	0.743079	2.11647	mMC018764	2984.85	6265.71	5000.42	7979.75	9941.2	11176.5	4539.06	9606.79
2410089E03Rik	RIKEN cDNA 2410089E03 gene [Source:MGI Symbol;Acc:MGI:1920942]	0.035691	0.743079	1.39793	mMC007197	768.003	680.022	939.838	1060.83	1221.32	1034.96	788.823	1102.72
Mrc1	mannose receptor, C type 1 [Source:MGI Symbol;Acc:MGI:97142]	0.0357041	0.743079	0.0722945	mMC008761	343.81	227.308	486.349	102.946	22.69	6.14827	336.223	24.307
Zfp617	zinc finger protein 617 [Source:MGI Symbol;Acc:MGI:2684459]	0.0357654	0.743079	1.11649	mMR027303	61.0141	58.967	59.1506	67.65	70.0432	62.5074	59.7034	66.6584
Ltbp3	latent transforming growth factor beta binding protein 3 [Source:MGI Symbol;Acc:MGI:1101355]	0.0358928	0.743079	0.722062	mMC021858	8283.39	8924.93	10950.5	6000.26	7465.03	6804.09	9320	6729.62
Palld	palladin, cytoskeletal associated protein [Source:MGI Symbol;Acc:MGI:1919583]	0.0359088	0.743079	0.391376	mMR026374	17156.6	6890.57	13289.2	5501.22	3536.69	4840.74	11625	4549.77
Abcc10	ATP-binding cassette, sub-family C (CFTR/MRP), member 10 [Source:MGI Symbol;Acc:MGI:2386976]	0.0359418	0.743079	1.55064	mMA033786	46.4869	44.7008	58.0552	66.6695	70.0432	96.3229	49.4116	76.6198
Mustn1	musculoskeletal, embryonic nuclear protein 1 [Source:MGI Symbol;Acc:MGI:1913425]	0.0360125	0.743079	0.291122	mMC006220	6802.59	3869.94	5509.77	2847.18	1544.9	813.621	5254.17	1529.6
Dusp18	dual specificity phosphatase 18 [Source:MGI Symbol;Acc:MGI:1922469]	0.0360767	0.743079	1.76939	mMC012623	147.209	135.053	102.966	202.95	185.466	301.265	126.973	224.665
Ccnt1	cyclin T1 [Source:MGI Symbol;Acc:MGI:1328363]	0.0361011	0.743079	1.45096	mMC022790	1444.97	1434.23	1323.22	1610.85	2332.14	2229.77	1399.7	2030.91
Smim14	small integral membrane protein 14 [Source:MGI Symbol;Acc:MGI:1915802]	0.0361171	0.743079	0.783432	mMC020676	13675.9	14198.7	16060.5	11378.9	10314.1	12777.1	14610.1	11446
Oat	ornithine aminotransferase [Source:MGI Symbol;Acc:MGI:97394]	0.0361365	0.743079	0.537273	mMC015672	7297.48	9762.84	7348.92	5419.84	4893.16	3061.84	8059.8	4330.31
		0.0361995	0.743079	2.87775	mMC018508	49.3924	79.8907	88.7259	113.73	273.267	268.475	70.4805	202.825
Srrm2	serine/arginine repetitive matrix 2 [Source:MGI Symbol;Acc:MGI:1923206]	0.0362097	0.743079	2.15781	mMC024428	262.457	440.35	446.916	1142.21	672.809	675.285	372.415	803.602
4930402K13Rik	RIKEN cDNA 4930402K13 gene [Source:MGI Symbol;Acc:MGI:1923025]	0.0362189	0.743079	1.66917	mMC002865	88.1315	92.2548	96.3936	133.339	128.248	213.14	92.1982	153.895
Arglu1	arginine and glutamate rich 1 [Source:MGI Symbol;Acc:MGI:2442985]	0.0362935	0.743079	1.8504	mMR027301	4076.32	2493.73	2399.98	4923.74	6574.2	4775.16	2900.29	5366.71
Nusap1	nucleolar and spindle associated protein 1 [Source:MGI Symbol;Acc:MGI:2675669]	0.0363536	0.743079	2.03304	mMR028279	399.981	404.209	540.023	1280.45	625.456	916.092	443.628	901.916
Pde1a	phosphodiesterase 1A, calmodulin-dependent [Source:MGI Symbol;Acc:MGI:1201792]	0.0364576	0.743079	0.180639	mMC019885	3010.03	2563.16	3474.55	1340.25	581.063	202.893	2992.83	540.62
		0.0364944	0.743079	1.72685	mMC018265	47.4554	35.19	52.5783	62.7478	97.6659	73.7793	44.4464	76.7524
Fam19a2	family with sequence similarity 19, member A2 [Source:MGI Symbol;Acc:MGI:2143691]	0.0364945	0.743079	0.256876	mMR028269	170.452	57.0648	66.8183	38.2369	18.744	15.3707	86.6208	22.2508
Cobll1	Cobl-like 1 [Source:MGI Symbol;Acc:MGI:2442894]	0.0365028	0.743079	1.57865	mMA032916	70.6989	110.325	101.87	159.811	147.979	132.188	92.6215	146.217
Psmd4	proteasome (prosome, macropain) 26S subunit, non-ATPase, 4 [Source:MGI Symbol;Acc:MGI:1201670]	0.0365325	0.743079	1.26322	mMA032650	48.4239	52.3094	54.7691	73.5326	65.1106	58.4086	51.7676	65.3937
Lmtk2	lemur tyrosine kinase 2 [Source:MGI Symbol;Acc:MGI:3036247]	0.036536	0.743079	1.51999	mMC012260	178.2	147.417	163.212	193.146	287.078	271.549	162.456	246.932
Gprin3	GPRIN family member 3 [Source:MGI Symbol;Acc:MGI:1924785]	0.036603	0.743079	0.393589	mMC018772	284.732	288.177	373.525	126.476	200.264	73.7793	312.948	123.173
Tldc1	TBC/LysM associated domain containing 1 [Source:MGI Symbol;Acc:MGI:1921597]	0.0367335	0.743079	1.31908	mMC019414	103.627	94.1569	85.4398	107.848	133.181	133.213	94.1157	124.146
A430005L14Rik	RIKEN cDNA A430005L14 gene [Source:MGI Symbol;Acc:MGI:2140680]	0.0367445	0.743079	0.868256	mMR027929	233.403	243.476	260.701	220.598	219.995	199.819	245.604	213.247
Pgf	placental growth factor [Source:MGI Symbol;Acc:MGI:105095]	0.0368052	0.743079	0.201724	mMC001897	336.062	254.889	590.411	175.498	64.1241	36.8896	369.807	74.5989
Sox18	SRY (sex determining region Y)-box 18 [Source:MGI Symbol;Acc:MGI:103559]	0.0368709	0.743079	0.317372	mMC014413	283.764	747.549	898.213	219.617	152.911	181.374	575.429	182.625
Pdgfrl	platelet-derived growth factor receptor-like [Source:MGI Symbol;Acc:MGI:1916047]	0.0368799	0.743079	0.298859	mMC010437	132.681	202.58	451.297	90.2	52.2858	68.6557	229.768	68.6682
Arhgap4	Rho GTPase activating protein 4 [Source:MGI Symbol;Acc:MGI:2159577]	0.0369048	0.743079	1.56175	mMR029982	855.166	836.95	686.804	969.649	1294.32	1491.98	789.213	1232.56
		0.0370201	0.743079	2.06878	mMC011319	62.9511	87.4994	72.2952	102.946	217.035	157.806	73.5708	152.202
Lnpep	leucyl/cystinyl aminopeptidase [Source:MGI Symbol;Acc:MGI:2387123]	0.0371225	0.743079	0.716455	mMC023351	48.4239	55.1626	54.7691	46.0804	34.5283	33.8155	52.6922	37.7516
Birc2	baculoviral IAP repeat-containing 2 [Source:MGI Symbol;Acc:MGI:1197009]	0.0371247	0.743079	2.17652	mMC021906	99.7532	51.3583	96.3936	136.28	173.628	215.19	79.0427	172.038
Efemp2	epidermal growth factor-containing fibulin-like extracellular matrix protein 2 [Source:MGI Symbol;Acc:MGI:1891209]	0.0371361	0.743079	0.7231	mMC018033	13039.6	12865.3	16032	9742.58	11656.8	8953.93	13906.7	10055.9
Got1	glutamic-oxaloacetic transaminase 1, soluble [Source:MGI Symbol;Acc:MGI:95791]	0.0371614	0.743079	1.89954	mMC017532	869.693	795.103	480.873	1132.4	1581.4	1272.69	692.798	1316
Slc36a4	solute carrier family 36 (proton/amino acid symporter), member 4 [Source:MGI Symbol;Acc:MGI:2442595]	0.0373177	0.743079	0.693165	mMC011418	104.596	115.081	119.397	89.2195	85.8276	62.5074	112.85	78.2239
Adamts2	a disintegrin-like and metallopeptidase (reprolysin type) with thrombospondin type 1 motif, 2 [Source:MGI Symbol;Acc:MGI:1347356]	0.0373227	0.743079	0.560566	mMC009994	15179	20444.4	25778.7	10125.9	13963.3	9966.35	19999.8	11211.2
Atp6v0a1	ATPase, H+ transporting, lysosomal V0 subunit A1 [Source:MGI Symbol;Acc:MGI:103286]	0.0373436	0.743079	0.477452	mMR028839	1258.05	816.978	553.168	414.724	364.027	409.885	828.429	395.535
Psma1	proteasome (prosome, macropain) subunit, alpha type 1 [Source:MGI Symbol;Acc:MGI:1347005]	0.0374631	0.743079	1.2371	mMA035113	6772.56	7205.38	6096.89	7481.69	8671.55	8682.38	6675.85	8258.7
Arel1	apoptosis resistant E3 ubiquitin protein ligase 1 [Source:MGI Symbol;Acc:MGI:1915747]	0.0375336	0.743079	0.610727	mMC013769	1332.63	1205.02	1455.76	623.556	1053.61	810.547	1327.18	810.546
Zbed4	zinc finger, BED type containing 4 [Source:MGI Symbol;Acc:MGI:2682302]	0.0376113	0.743079	1.56082	mMC023571	212.097	305.297	259.605	329.426	460.707	421.157	256.167	399.83
Luc7l	Luc7 homolog (S. cerevisiae)-like [Source:MGI Symbol;Acc:MGI:1914228]	0.0376503	0.743079	1.62433	mMC008341	529.757	346.193	437.057	822.584	583.036	716.274	431.166	700.355
Cst3	cystatin C [Source:MGI Symbol;Acc:MGI:102519]	0.037651	0.743079	0.498044	mMC025819	26753.2	45631.9	48319.5	18969.4	15708.4	24455.8	38927.4	19387.5
Adam8	a disintegrin and metallopeptidase domain 8 [Source:MGI Symbol;Acc:MGI:107825]	0.0377134	0.743079	0.355238	mMA035389	141.398	193.069	258.51	102.946	78.9219	38.9391	191.813	68.1392
Spag1	sperm associated antigen 1 [Source:MGI Symbol;Acc:MGI:1349387]	0.037782	0.743079	1.94967	mMC010423	163.673	91.3037	119.397	193.146	221.968	308.438	121.288	236.473
		0.0379286	0.743079	2.78757	mMR027761	409.666	349.997	143.495	774.543	662.944	867.931	274.017	763.84
Diablo	diablo, IAP-binding mitochondrial protein [Source:MGI Symbol;Acc:MGI:1913843]	0.0379819	0.743079	1.89064	mMC013358	1813.96	1135.59	1503.96	2237.35	2489	3759.67	1457.79	2756.15
Ptk7	PTK7 protein tyrosine kinase 7 [Source:MGI Symbol;Acc:MGI:1918711]	0.0379822	0.743079	0.714048	mMC003453	661.47	599.18	670.374	491.198	373.893	526.702	642.878	459.046
Nedd4l	neural precursor cell expressed, developmentally down-regulated gene 4-like [Source:MGI Symbol;Acc:MGI:1933754]	0.0380098	0.743079	1.33625	mMR030274	1217.38	1202.17	970.508	1460.85	1376.2	1685.65	1124.08	1502.05
C1qc	complement component 1, q subcomponent, C chain [Source:MGI Symbol;Acc:MGI:88225]	0.0380227	0.743079	0.0582668	mMC018137	1767.47	502.17	1273.93	289.228	50.3127	15.3707	1041.8	60.7021
Abhd16a	abhydrolase domain containing 16A [Source:MGI Symbol;Acc:MGI:99476]	0.0380626	0.743079	0.681022	mMC014156	2680.75	2341.56	3037.49	2126.56	1881.3	1505.3	2671.52	1819.37
Abi3bp	ABI gene family, member 3 (NESH) binding protein [Source:MGI Symbol;Acc:MGI:2444583]	0.0381054	0.743079	0.065354	mMC024227	256.647	705.701	4769.29	95.1021	65.1106	38.9391	952.365	62.2409
Pdia5	protein disulfide isomerase associated 5 [Source:MGI Symbol;Acc:MGI:1919849]	0.0381726	0.743079	0.503567	mMA034183	767.034	918.743	1066.9	347.074	681.688	405.786	909.308	457.897
Kcnj14	potassium inwardly-rectifying channel, subfamily J, member 14 [Source:MGI Symbol;Acc:MGI:2384820]	0.0382041	0.743079	1.29187	mMR001483	54.2348	52.3094	54.7691	63.7282	64.1241	81.977	53.7606	69.4515
Rnf40	ring finger protein 40 [Source:MGI Symbol;Acc:MGI:2142048]	0.0382428	0.743079	0.702538	mMR028846	921.022	780.837	835.776	594.143	493.262	711.15	843.931	592.893
Uba1	ubiquitin-like modifier activating enzyme 1 [Source:MGI Symbol;Acc:MGI:98890]	0.0382873	0.743079	0.7975	mMC019169	7480.52	7147.37	6228.34	6108.11	5278.89	5238.33	6931.33	5527.74
		0.0382979	0.743079	1.58223	mMR028777	262.457	208.287	246.461	297.072	472.545	380.168	237.952	376.496
Recql	RecQ protein-like [Source:MGI Symbol;Acc:MGI:103021]	0.0383366	0.743079	1.71314	mMC002510	188.853	266.302	253.033	353.937	529.763	341.229	233.467	399.961
Mrc2	mannose receptor, C type 2 [Source:MGI Symbol;Acc:MGI:107818]	0.0384083	0.743079	0.719854	mMA034529	517.167	390.894	420.627	350.995	278.2	324.834	439.74	316.548
Kif1c	kinesin family member 1C [Source:MGI Symbol;Acc:MGI:1098260]	0.0384126	0.743079	0.821747	mMR027765	792.215	636.272	691.186	567.671	582.049	585.111	703.656	578.227
Siglecg	sialic acid binding Ig-like lectin G [Source:MGI Symbol;Acc:MGI:2443630]	0.0384288	0.743079	3.81686	mMC015363	305.07	280.569	101.87	477.471	863.208	1176.37	205.824	785.601
Ino80c	INO80 complex subunit C [Source:MGI Symbol;Acc:MGI:2443014]	0.0384575	0.743079	1.14468	mMA032958	506.514	463.176	481.968	542.18	593.887	526.702	483.562	553.525
Satb1	special AT-rich sequence binding protein 1 [Source:MGI Symbol;Acc:MGI:105084]	0.0384931	0.743079	0.213249	mMC017385	49.3924	68.4778	48.1968	28.4326	10.8518	5.12356	54.6272	11.6492
Hist1h2bl	histone cluster 1, H2bl [Source:MGI Symbol;Acc:MGI:2448403]	0.0385121	0.743079	0.548426	mMC020098	8873.19	8444.64	7949.19	6033.59	5159.52	3156.11	8413.85	4614.37
Tada2a	transcriptional adaptor 2A [Source:MGI Symbol;Acc:MGI:2144471]	0.0385759	0.743079	1.56821	mMC018549	699.241	805.565	610.128	921.608	1397.9	1028.81	700.459	1098.47
Dapp1	dual adaptor for phosphotyrosine and 3-phosphoinositides 1 [Source:MGI Symbol;Acc:MGI:1347063]	0.0386191	0.743079	0.777225	mMR026795	87.163	72.2821	81.0582	68.6304	63.1375	55.3344	79.9319	62.125
		0.0386805	0.743079	2.63275	mMR028755	160.767	299.59	148.972	691.206	585.009	323.809	192.875	507.792
Dtna	dystrobrevin alpha [Source:MGI Symbol;Acc:MGI:106039]	0.0387879	0.743079	3.37938	mMA035701	50.3608	61.8202	51.4829	93.1413	180.534	367.872	54.3203	183.569
Gpx3	glutathione peroxidase 3 [Source:MGI Symbol;Acc:MGI:105102]	0.0387886	0.743079	0.368892	mMC011750	4670.97	4485.29	8468.4	3161.9	2164.43	1301.38	5619.09	2072.84
Obsl1	obscurin-like 1 [Source:MGI Symbol;Acc:MGI:2138628]	0.0388297	0.743079	0.459907	mMR026958	475.523	557.333	434.867	358.839	199.278	156.781	486.647	223.812
Rbbp5	retinoblastoma binding protein 5 [Source:MGI Symbol;Acc:MGI:1918367]	0.0388997	0.743079	1.81313	mMR030196	69.7304	40.8964	40.5291	91.1804	99.6389	75.8287	48.7108	88.3191
Rhbdd2	rhomboid domain containing 2 [Source:MGI Symbol;Acc:MGI:1915612]	0.0389319	0.743079	2.14021	mMC025051	399.981	248.232	282.608	434.332	863.208	733.694	303.874	650.356
Mbd6	methyl-CpG binding domain protein 6 [Source:MGI Symbol;Acc:MGI:106378]	0.0391117	0.743079	1.34222	mMC023636	535.568	520.241	572.885	664.734	661.958	877.153	542.453	728.089
Dfna5	deafness, autosomal dominant 5 (human) [Source:MGI Symbol;Acc:MGI:1889850]	0.0391301	0.743079	1.82947	mMC021230	532.663	509.779	583.838	688.265	1046.7	1347.5	541.222	990.152
Rad51c	RAD51 homolog C [Source:MGI Symbol;Acc:MGI:2150020]	0.0391494	0.743079	2.66961	mMC017205	223.718	213.993	102.966	364.722	685.634	375.045	170.189	454.338
Cxcl14	chemokine (C-X-C motif) ligand 14 [Source:MGI Symbol;Acc:MGI:1888514]	0.0391631	0.743079	0.193207	mMC011383	671.155	258.694	178.547	128.437	40.4475	43.0379	314.138	60.6938
Nup37	nucleoporin 37 [Source:MGI Symbol;Acc:MGI:1919964]	0.0392176	0.743079	1.7289	mMA034702	129.776	115.081	73.3906	194.126	161.79	180.349	103.105	178.258
Trim35	tripartite motif-containing 35 [Source:MGI Symbol;Acc:MGI:1914104]	0.0392638	0.743079	0.702943	mMR026772	357.368	499.317	465.537	334.328	275.24	313.562	436.331	306.716
Ndufa9	NADH dehydrogenase (ubiquinone) 1 alpha subcomplex, 9 [Source:MGI Symbol;Acc:MGI:1913358]	0.0392903	0.743079	1.70448	mMC025977	7148.33	7993.83	6186.72	9649.43	11023.4	16457.9	7070.88	12052.1
Mdm1	transformed mouse 3T3 cell double minute 1 [Source:MGI Symbol;Acc:MGI:96951]	0.0393161	0.743079	6.90657	mMA032125	24.2119	17.1194	20.8123	40.1978	238.739	296.142	20.5091	141.647
Tnpo1	transportin 1 [Source:MGI Symbol;Acc:MGI:2681523]	0.0393179	0.743079	1.51403	mMR028365	133.65	107.472	94.2028	154.909	201.251	150.633	110.605	167.46
Luzp1	leucine zipper protein 1 [Source:MGI Symbol;Acc:MGI:107629]	0.0394088	0.743079	0.491027	mMA032521	788.341	456.518	860.97	262.756	342.324	407.835	676.685	332.27
Fzd9	frizzled class receptor 9 [Source:MGI Symbol;Acc:MGI:1313278]	0.0394291	0.743079	0.55588	mMC012985	66.825	54.2116	62.4368	48.0413	31.5688	25.6178	60.9289	33.8692
Larp1b	La ribonucleoprotein domain family, member 1B [Source:MGI Symbol;Acc:MGI:1914604]	0.0394885	0.743079	0.370634	mMA031546	57.1402	116.983	101.87	51.963	29.5957	22.5437	87.9773	32.6074
Fzd8	frizzled class receptor 8 [Source:MGI Symbol;Acc:MGI:108460]	0.0394919	0.743079	0.300741	mMC019983	165.61	259.645	389.956	119.613	90.7602	42.0132	255.953	76.9756
Casp3	caspase 3 [Source:MGI Symbol;Acc:MGI:107739]	0.0395091	0.743079	2.06282	mMC022395	1954.39	1522.68	1330.89	2135.39	4125.64	3946.17	1582.17	3263.73
Mtus2	microtubule associated tumor suppressor candidate 2 [Source:MGI Symbol;Acc:MGI:1915388]	0.039539	0.743079	0.35742	mMC009481	75.5413	212.091	133.637	59.8065	48.3397	33.8155	128.887	46.0669
Pbrm1	polybromo 1 [Source:MGI Symbol;Acc:MGI:1923998]	0.0395411	0.743079	0.664969	mMC025930	1855.6	1985.85	1678.12	1571.64	1076.3	1074.92	1835.49	1220.55
Smoc2	SPARC related modular calcium binding 2 [Source:MGI Symbol;Acc:MGI:1929881]	0.0395987	0.743079	0.093829	mMC011279	1731.64	5896.7	14149	896.117	726.082	183.423	5247.24	492.344
Ddo	D-aspartate oxidase [Source:MGI Symbol;Acc:MGI:1925528]	0.03961	0.743079	1.66058	mMA033127	368.022	414.671	429.39	554.926	585.009	924.29	403.159	669.476
BC037034	cDNA sequence BC037034 [Source:MGI Symbol;Acc:MGI:2385896]	0.0397001	0.743079	1.80024	mMC023930	755.413	673.365	481.968	850.036	1331.81	1263.47	625.87	1126.72
Med26	mediator complex subunit 26 [Source:MGI Symbol;Acc:MGI:1917875]	0.0397203	0.743079	1.22498	mMC004129	1417.85	1650.12	1479.86	1676.54	1937.53	1959.25	1512.83	1853.18
Chkb	choline kinase beta [Source:MGI Symbol;Acc:MGI:1328313]	0.0397684	0.743079	2.06116	mMC011702	31.9598	32.3367	48.1968	50.9826	89.7737	95.2982	36.7936	75.8377
Nfatc1	nuclear factor of activated T cells, cytoplasmic, calcineurin dependent 1 [Source:MGI Symbol;Acc:MGI:102469]	0.0397982	0.743079	0.738227	mMA031638	414.508	500.268	587.125	365.702	360.081	371.97	495.628	365.886
Trim44	tripartite motif-containing 44 [Source:MGI Symbol;Acc:MGI:1931835]	0.0398551	0.743079	0.290645	mMR030010	200.475	103.668	202.646	90.2	41.434	27.6672	161.49	46.9364
Ptges3l	prostaglandin E synthase 3 (cytosolic)-like [Source:MGI Symbol;Acc:MGI:1916146]	0.0398577	0.743079	0.536317	mMA032051	1015.93	1437.08	878.496	592.182	447.882	745.99	1086.5	582.708
Orc6	origin recognition complex, subunit 6 [Source:MGI Symbol;Acc:MGI:1929285]	0.039885	0.743079	1.75328	mMC005185	5735.33	5862.46	5345.46	6855.2	12381.9	11412.2	5643.4	9894.46
Eif5	eukaryotic translation initiation factor 5 [Source:MGI Symbol;Acc:MGI:95309]	0.0399109	0.743079	0.511063	mMR001163	9731.26	9734.3	5181.16	4348.23	4356.49	3458.4	7888	4031.27
Slc25a3	solute carrier family 25 (mitochondrial carrier, phosphate carrier), member 3 [Source:MGI Symbol;Acc:MGI:1353498]	0.0399326	0.743079	1.73736	mMA032305	80.3837	99.8634	75.5813	113.73	199.278	140.386	84.657	147.08
Slc35a5	solute carrier family 35, member A5 [Source:MGI Symbol;Acc:MGI:1921352]	0.0399698	0.743079	0.328609	mMC025655	65.8565	35.19	66.8183	32.3543	13.8113	12.2965	53.6996	17.6462
1700034E13Rik	RIKEN cDNA 1700034E13 gene [Source:MGI Symbol;Acc:MGI:1925664]	0.0400481	0.743079	0.430248	mMC013469	83.2891	136.956	66.8183	56.8652	32.5553	32.7908	91.3456	39.3013
Xrcc4	X-ray repair complementing defective repair in Chinese hamster cells 4 [Source:MGI Symbol;Acc:MGI:1333799]	0.0401234	0.743079	0.713531	mMR028711	716.674	652.441	839.062	454.921	512.992	610.728	732.069	522.354
Rec8	REC8 meiotic recombination protein [Source:MGI Symbol;Acc:MGI:1929645]	0.0402991	0.743079	0.611784	mMC002903	76.5097	66.5756	67.9137	58.8261	35.5149	37.9143	70.1988	42.9465
		0.0404298	0.743079	1.65291	mMC023482	97.8163	69.4288	86.5352	136.28	110.491	176.25	83.7622	138.451
Gzme	granzyme E [Source:MGI Symbol;Acc:MGI:109265]	0.0404307	0.743079	0.0365048	mMC026211	1595.08	279.617	158.83	59.8065	18.744	3.07414	413.771	15.1047
Cxcr4	chemokine (C-X-C motif) receptor 4 [Source:MGI Symbol;Acc:MGI:109563]	0.0404407	0.743079	0.152595	mMC018222	64.888	60.8691	161.021	37.2565	5.91914	10.2471	85.9966	13.1226
Fcgr3	Fc receptor, IgG, low affinity III [Source:MGI Symbol;Acc:MGI:95500]	0.0404455	0.743079	0.169542	mMC025343	296.354	246.33	392.147	150.006	45.3801	20.4942	305.909	51.8644
Ccng1	cyclin G1 [Source:MGI Symbol;Acc:MGI:102890]	0.0404784	0.743079	1.68154	mMC013886	26181.8	18495.7	14575.1	31525.9	34668.4	30704.5	19182	32255.3
		0.0405635	0.743079	1.6136	mMC021876	192.727	244.428	240.984	394.135	439.003	275.648	224.747	362.651
Sipa1	signal-induced proliferation associated gene 1 [Source:MGI Symbol;Acc:MGI:107576]	0.0405772	0.743079	1.36395	mMC020720	662.439	513.583	499.494	812.78	777.381	682.458	553.897	755.488
Rock1	Rho-associated coiled-coil containing protein kinase 1 [Source:MGI Symbol;Acc:MGI:107927]	0.0406593	0.743079	0.55868	mMC008843	2898.65	4855.26	2759.27	2187.35	1717.54	1802.47	3386.37	1891.9
Rbm20	RNA binding motif protein 20 [Source:MGI Symbol;Acc:MGI:1920963]	0.0406917	0.743079	1.96737	mMC022550	40.6761	64.6734	63.5321	77.4543	124.302	132.188	55.0832	108.369
Rcn3	reticulocalbin 3, EF-hand calcium binding domain [Source:MGI Symbol;Acc:MGI:1277122]	0.040727	0.743079	0.63722	mMC013721	24394	24223.1	35080.7	18629.2	19601.2	14688.2	27470.1	17504.5
		0.0407895	0.743079	0.300997	mMC012882	114.28	62.7713	71.1998	46.0804	22.69	13.3213	79.935	24.0602
Mdm1	transformed mouse 3T3 cell double minute 1 [Source:MGI Symbol;Acc:MGI:96951]	0.0408858	0.743079	8.31732	mMA034740	73.6043	69.4288	53.6737	136.28	1396.92	828.992	64.9733	540.403
Epc1	enhancer of polycomb homolog 1 (Drosophila) [Source:MGI Symbol;Acc:MGI:1278322]	0.0409036	0.743079	2.18027	mMA032040	255.678	575.403	289.181	875.528	712.27	707.051	349.096	761.124
P3h3	prolyl 3-hydroxylase 3 [Source:MGI Symbol;Acc:MGI:1315208]	0.0410509	0.743079	0.567174	mMC013332	1962.14	2612.62	2846.9	1685.37	1544.9	1022.66	2443.76	1386.04
Cdrt4	CMT1A duplicated region transcript 4 [Source:MGI Symbol;Acc:MGI:1913588]	0.0410881	0.743079	0.30601	mMC013585	59.0771	78.9396	42.7199	31.3739	19.7305	9.22241	58.4048	17.8724
Mtcl1	microtubule crosslinking factor 1 [Source:MGI Symbol;Acc:MGI:1915867]	0.0412192	0.743079	2.19109	mMC012484	40.6761	35.19	33.9568	50.0021	83.8545	121.941	36.4946	79.9628
Mydgf	myeloid derived growth factor [Source:MGI Symbol;Acc:MGI:2156020]	0.0412682	0.743079	0.783342	mMC019362	7313.94	7226.31	5771.57	5403.17	5452.52	4977.03	6731.63	5273.17
Smc3	structural maintenance of chromosomes 3 [Source:MGI Symbol;Acc:MGI:1339795]	0.0412965	0.743079	1.5347	mMC021385	1436.25	1464.66	1581.73	1777.53	2897.42	2335.32	1492.91	2291.17
Arl5a	ADP-ribosylation factor-like 5A [Source:MGI Symbol;Acc:MGI:1922673]	0.0413123	0.743079	0.483638	mMR029891	3686.03	2602.15	1834.76	1652.03	1155.22	1043.16	2601.1	1257.99
Psip1	PC4 and SFRS1 interacting protein 1 [Source:MGI Symbol;Acc:MGI:2142116]	0.0413329	0.743079	1.66778	mMR028508	2350.5	3207.04	2275.11	3663.88	5604.44	3874.44	2578.83	4300.91
Msl3l2	male-specific lethal 3-like 2 (Drosophila) [Source:MGI Symbol;Acc:MGI:1920640]	0.0413747	0.743079	0.280933	mMC014944	171.421	183.558	115.015	90.2	39.461	22.5437	153.531	43.132
Map4k5	mitogen-activated protein kinase kinase kinase kinase 5 [Source:MGI Symbol;Acc:MGI:1925503]	0.0414846	0.743079	0.520553	mMC023296	2392.14	2596.45	2729.69	1979.5	1291.36	935.562	2568.98	1337.29
Dyrk3	dual-specificity tyrosine-(Y)-phosphorylation regulated kinase 3 [Source:MGI Symbol;Acc:MGI:1330300]	0.0415494	0.743079	6.58996	mMR031190	71.6674	53.2605	23.003	100.004	471.558	532.85	44.4464	292.9
Thsd1	thrombospondin, type I, domain 1 [Source:MGI Symbol;Acc:MGI:1929096]	0.0416009	0.743079	0.550692	mMR026873	90.0684	169.292	154.449	69.6108	79.9084	70.7051	133.045	73.2667
Zfp451	zinc finger protein 451 [Source:MGI Symbol;Acc:MGI:2137896]	0.0416534	0.743079	1.58829	mMR028460	597.551	528.8	507.162	851.017	671.823	1123.08	543.172	862.717
Dis3l	DIS3 like exosome 3'-5' exoribonuclease [Source:MGI Symbol;Acc:MGI:2143272]	0.041671	0.743079	0.699668	mMC000855	914.243	1030.02	1009.94	708.854	556.399	825.918	983.41	688.061
Olig2	oligodendrocyte transcription factor 2 [Source:MGI Symbol;Acc:MGI:1355331]	0.0417875	0.743079	1.73633	mMR031057	67.7934	76.0864	41.6245	105.887	98.6524	107.595	59.8799	103.971
Ensa	endosulfine alpha [Source:MGI Symbol;Acc:MGI:1891189]	0.0418157	0.743079	1.45651	mMR027872	1353.93	1822.27	1275.02	2042.24	1968.12	2418.32	1465.24	2134.15
		0.0419233	0.743079	2.51645	mMC013709	1381.05	1486.54	1879.68	2187.35	5733.68	4903.25	1568.52	3947.1
		0.0419468	0.743079	1.57841	mMC007029	633.384	661.001	606.841	842.193	875.047	1355.69	633.356	999.696
		0.0420232	0.743079	0.452771	mMR026657	443.563	494.562	678.041	368.643	229.86	162.929	529.839	239.896
Tra2a	transformer 2 alpha homolog (Drosophila) [Source:MGI Symbol;Acc:MGI:1933972]	0.042038	0.743079	2.19318	mMR026465	110.406	236.819	173.07	442.176	397.569	271.549	165.403	362.759
Zeb2	zinc finger E-box binding homeobox 2 [Source:MGI Symbol;Acc:MGI:1344407]	0.042071	0.743079	2.1599	mMA033290	572.37	808.418	750.336	977.493	1608.03	2225.67	702.84	1518.06
Sfrp1	secreted frizzled-related protein 1 [Source:MGI Symbol;Acc:MGI:892014]	0.0421036	0.743079	0.28369	mMC022587	13798.9	6410.28	27024.2	3255.04	4579.44	3661.3	13370.8	3793.16
Fam222b	family with sequence similarity 222, member B [Source:MGI Symbol;Acc:MGI:2384939]	0.0422603	0.743079	1.65073	mMR028350	5510.64	4231.35	4886.5	6827.74	6918.49	10849.6	4847.97	8002.67
Atf2	activating transcription factor 2 [Source:MGI Symbol;Acc:MGI:109349]	0.0422677	0.743079	2.1546	mMR029592	821.269	1656.78	1202.73	1913.81	2532.41	3377.45	1178.44	2539.06
Cyb561	cytochrome b-561 [Source:MGI Symbol;Acc:MGI:103253]	0.0422953	0.743079	0.186924	mMC010012	1308.41	1018.61	947.505	589.241	158.83	88.1252	1080.88	202.042
Trdmt1	tRNA aspartic acid methyltransferase 1 [Source:MGI Symbol;Acc:MGI:1274787]	0.0423091	0.743079	0.576597	mMA031556	193.696	279.617	261.796	150.987	104.572	172.152	242.037	139.558
		0.04233	0.743079	1.6712	mMC011634	205.317	151.222	143.495	255.893	227.887	356.6	164.548	274.992
Ebf2	early B cell factor 2 [Source:MGI Symbol;Acc:MGI:894332]	0.0423316	0.743079	0.184222	mMC013203	393.202	310.052	1323.22	188.243	98.6524	54.3097	544.37	100.285
Ism1	isthmin 1, angiogenesis inhibitor [Source:MGI Symbol;Acc:MGI:2442963]	0.0423357	0.743079	0.285354	mMC010845	14647.3	17798.5	38638.5	8182.7	8565	3339.54	21596.7	6162.69
Cpsf7	cleavage and polyadenylation specific factor 7 [Source:MGI Symbol;Acc:MGI:1917826]	0.0423536	0.743079	1.64893	mMC020247	555.906	597.278	648.466	763.758	1340.69	942.735	599.361	988.305
Slc35b2	solute carrier family 35, member B2 [Source:MGI Symbol;Acc:MGI:1921086]	0.0424437	0.743079	0.788066	mMC014711	7881.47	8660.53	8094.87	7339.53	5642.92	6529.46	8205.79	6466.71
Pcdha1	protocadherin alpha 1 [Source:MGI Symbol;Acc:MGI:2150982]	0.0424573	0.743079	0.692868	mMR030381	70.6989	60.8691	71.1998	40.1978	43.4071	58.4086	67.416	46.7103
		0.0424658	0.743079	1.87437	mMC007423	48.4239	43.7497	39.4337	85.2978	114.437	56.3592	43.7154	81.9387
Psip1	PC4 and SFRS1 interacting protein 1 [Source:MGI Symbol;Acc:MGI:2142116]	0.0425128	0.743079	1.53324	mMA031581	174.326	201.629	226.744	257.854	389.677	285.895	199.749	306.263
Polr3k	polymerase (RNA) III (DNA directed) polypeptide K [Source:MGI Symbol;Acc:MGI:1914255]	0.0425162	0.743079	1.5778	mMR028286	132.681	113.179	83.249	186.283	146.992	179.325	107.725	169.969
Rcn2	reticulocalbin 2 [Source:MGI Symbol;Acc:MGI:1349765]	0.0425464	0.743079	0.568461	mMC009852	1775.22	1153.66	1129.34	857.88	843.478	587.16	1322.47	751.771
Dtna	dystrobrevin alpha [Source:MGI Symbol;Acc:MGI:106039]	0.0425885	0.743079	3.83267	mMC022940	174.326	121.738	62.4368	225.5	445.909	741.891	109.836	420.963
Rabgap1l	RAB GTPase activating protein 1-like [Source:MGI Symbol;Acc:MGI:1352507]	0.0426242	0.743079	0.483287	mMC023488	72.6358	66.5756	105.157	53.9239	26.6361	39.9638	79.818	38.575
Rps6ka1	ribosomal protein S6 kinase polypeptide 1 [Source:MGI Symbol;Acc:MGI:104558]	0.0426266	0.743079	1.60484	mMC013537	129.776	114.13	115.015	143.143	243.671	201.868	119.431	191.667
Ifna14	interferon alpha 14 [Source:MGI Symbol;Acc:MGI:3641425]	0.0426418	0.743079	1.27219	mMC019878	56.1717	66.5756	55.8645	83.3369	68.0701	75.8287	59.3366	75.4876
Cdh5	cadherin 5 [Source:MGI Symbol;Acc:MGI:105057]	0.0426487	0.743079	0.200239	mMC003647	243.088	521.192	978.176	193.146	96.6793	53.285	498.57	99.8331
Cdc25b	cell division cycle 25B [Source:MGI Symbol;Acc:MGI:99701]	0.0426512	0.743079	1.2387	mMC011704	115.249	120.787	112.824	151.967	125.289	156.781	116.239	143.985
Atg101	autophagy related 101 [Source:MGI Symbol;Acc:MGI:1915368]	0.0426628	0.743079	1.46435	mMC025004	2441.53	2340.61	2768.03	2899.14	4021.07	4260.75	2510.27	3675.92
Bod1	biorientation of chromosomes in cell division 1 [Source:MGI Symbol;Acc:MGI:1916806]	0.042682	0.743079	1.44036	mMA033632	1484.68	1816.56	1884.06	2229.51	2252.23	3023.92	1719.2	2476.27
		0.0427487	0.743079	2.19125	mMC006613	30.0228	44.7008	70.1044	92.1608	123.315	87.1005	45.4818	99.6617
Adig	adipogenin [Source:MGI Symbol;Acc:MGI:2675492]	0.0427666	0.743079	1.26915	mMC016146	87.163	72.2821	69.009	103.926	92.7332	92.2241	75.757	96.1468
Zfp775	zinc finger protein 775 [Source:MGI Symbol;Acc:MGI:2683557]	0.0428341	0.743079	1.43999	mMC024168	125.902	82.744	96.3936	138.241	146.992	147.559	100.14	144.2
Paxbp1	PAX3 and PAX7 binding protein 1 [Source:MGI Symbol;Acc:MGI:1914617]	0.0428381	0.743079	1.87255	mMA035395	79.4152	74.1842	134.732	145.104	206.183	174.201	92.5895	173.378
P2rx7	purinergic receptor P2X, ligand-gated ion channel, 7 [Source:MGI Symbol;Acc:MGI:1339957]	0.0428546	0.743079	1.83959	mMA032176	91.0369	79.8907	100.775	136.28	136.14	245.931	90.1618	165.861
Hnrnpl	heterogeneous nuclear ribonucleoprotein L [Source:MGI Symbol;Acc:MGI:104816]	0.0428686	0.743079	1.24001	mMC017857	10385	11691.6	9973.45	14053.5	13897.2	11822.1	10658.8	13217.1
Dnajb4	DnaJ heat shock protein family (Hsp40) member B4 [Source:MGI Symbol;Acc:MGI:1914285]	0.0428715	0.743079	1.5842	mMC025857	53.2663	44.7008	72.2952	97.063	91.7467	76.8534	55.6278	88.1257
Gosr2	golgi SNAP receptor complex member 2 [Source:MGI Symbol;Acc:MGI:1927204]	0.0429494	0.743079	1.61951	mMA032700	583.992	643.881	990.225	1124.56	1233.15	1140.5	719.419	1165.11
Slc29a4	solute carrier family 29 (nucleoside transporters), member 4 [Source:MGI Symbol;Acc:MGI:2385330]	0.0430086	0.743079	1.22426	mMC018362	57.1402	61.8202	54.7691	79.4152	65.1106	68.6557	57.8366	70.8072
Afmid	arylformamidase [Source:MGI Symbol;Acc:MGI:2448704]	0.0431104	0.743079	1.50403	mMC020293	131.713	109.374	166.498	175.498	215.062	216.214	133.86	201.329
Agtr1b	angiotensin II receptor, type 1b [Source:MGI Symbol;Acc:MGI:87965]	0.0431615	0.743079	0.101195	mMC007753	282.795	193.069	408.577	96.0826	33.5418	7.17298	281.505	28.4868
Ccnd1	cyclin D1 [Source:MGI Symbol;Acc:MGI:88313]	0.0431702	0.743079	2.20122	mMR030527	3651.16	2108.54	1473.29	4485.49	4930.65	5469.91	2246.81	4945.74
Ank3	ankyrin 3, epithelial [Source:MGI Symbol;Acc:MGI:88026]	0.043249	0.743079	2.84099	mMC024744	284.732	252.987	153.353	360.8	1021.05	687.582	222.712	632.722
Ndufa12	NADH dehydrogenase (ubiquinone) 1 alpha subcomplex, 12 [Source:MGI Symbol;Acc:MGI:1913664]	0.0432784	0.743079	1.2538	mMC001015	10782.1	10189.9	9794.9	11447.6	12623.6	14678	10247.6	12848.5
		0.0432923	0.743079	2.87787	mMC021175	129.776	112.227	188.406	357.858	244.658	747.015	140	402.903
Uhrf1	ubiquitin-like, containing PHD and RING finger domains, 1 [Source:MGI Symbol;Acc:MGI:1338889]	0.0433003	0.743079	3.64817	mMC026144	1132.15	668.609	292.467	2612.86	2795.81	1471.49	604.948	2206.95
Lhx8	LIM homeobox protein 8 [Source:MGI Symbol;Acc:MGI:1096343]	0.0433296	0.743079	0.159377	mMC011224	148.177	166.439	143.495	57.8456	34.5283	7.17298	152.39	24.2875
Morf4l1	mortality factor 4 like 1 [Source:MGI Symbol;Acc:MGI:1096551]	0.0433522	0.743079	0.660282	mMR027811	7390.45	5661.78	7284.29	4616.86	3594.89	5286.49	6729.82	4443.58
D130052B06Rik	RIKEN cDNA D130052B06 gene [Source:MGI Symbol;Acc:MGI:2685092]	0.0433605	0.743079	0.757659	mMC025993	90.0684	113.179	108.443	75.4934	88.7872	71.7298	103.398	78.3405
Fam178a	family with sequence similarity 178, member A [Source:MGI Symbol;Acc:MGI:1924968]	0.0433808	0.743079	1.92928	mMC016765	1372.33	1271.59	1387.85	1682.43	2906.3	3556.78	1342.92	2590.86
Fxyd1	FXYD domain-containing ion transport regulator 1 [Source:MGI Symbol;Acc:MGI:1889273]	0.0434797	0.743079	0.274881	mMC013963	873.567	1044.29	3554.51	432.372	415.327	375.045	1480.13	406.858
Murc	muscle-related coiled-coil protein [Source:MGI Symbol;Acc:MGI:1915266]	0.0435045	0.743079	0.366885	mMC002570	109.438	261.547	212.504	80.3956	86.8141	43.0379	182.542	66.9717
		0.0435111	0.743079	1.6944	mMC012093	1608.64	1550.26	2313.45	2413.83	3759.64	3092.58	1793.53	3038.96
Akt2	thymoma viral proto-oncogene 2 [Source:MGI Symbol;Acc:MGI:104874]	0.0435136	0.743079	1.58344	mMC018059	324.44	337.633	403.1	434.332	712.27	566.666	353.452	559.669
Gas2	growth arrest specific 2 [Source:MGI Symbol;Acc:MGI:95657]	0.0436315	0.743079	0.330206	mMC017313	137.524	110.325	342.854	50.9826	77.9354	47.1367	173.269	57.2144
Itpr3	inositol 1,4,5-triphosphate receptor 3 [Source:MGI Symbol;Acc:MGI:96624]	0.0436963	0.743079	2.59602	mMC022172	191.759	387.09	133.637	456.882	608.685	624.05	214.864	557.792
Ncapd2	non-SMC condensin I complex, subunit D2 [Source:MGI Symbol;Acc:MGI:1915548]	0.0436998	0.743079	1.67693	mMC022934	55.2032	65.6245	58.0552	85.2978	140.086	83.0017	59.469	99.7256
Egln3	egl-9 family hypoxia-inducible factor 3 [Source:MGI Symbol;Acc:MGI:1932288]	0.0437328	0.743079	3.34444	mMC021021	499.735	395.649	168.689	670.617	1175.94	1582.16	321.893	1076.55
St5	suppression of tumorigenicity 5 [Source:MGI Symbol;Acc:MGI:108517]	0.0437628	0.743079	0.606125	mMA033236	158.83	94.1569	140.209	84.3173	81.8815	67.631	127.993	77.5799
Taf1a	TATA box binding protein (Tbp)-associated factor, RNA polymerase I, A [Source:MGI Symbol;Acc:MGI:109578]	0.0438069	0.743079	1.81778	mMR026341	266.331	345.242	223.458	424.528	688.594	422.181	273.893	497.878
Lox	lysyl oxidase [Source:MGI Symbol;Acc:MGI:96817]	0.0438164	0.743079	0.397667	mMC016520	59233.1	59222.8	58794.6	41118.4	23006.7	13710.6	59083.1	23495.4
Tmprss6	transmembrane serine protease 6 [Source:MGI Symbol;Acc:MGI:1919003]	0.0438786	0.743079	0.643008	mMC009049	152.051	150.271	162.116	112.75	118.383	73.7793	154.726	99.4901
Epha3	Eph receptor A3 [Source:MGI Symbol;Acc:MGI:99612]	0.0439656	0.743079	0.0682088	mMA032118	1334.56	1366.7	5999.41	595.124	146.006	39.9638	2220.11	151.431
Eif3i	eukaryotic translation initiation factor 3, subunit I [Source:MGI Symbol;Acc:MGI:1860763]	0.043979	0.743079	1.63988	mMA031756	7926.99	11093.4	6654.44	12237.8	13148.4	16037.8	8364.27	13716.4
Rps4l	ribosomal protein S4-like [Source:MGI Symbol;Acc:MGI:1913434]	0.044007	0.743079	0.213235	mMC024097	1028.52	988.172	1393.33	622.576	213.089	103.496	1122.97	239.456
Aldh3a2	aldehyde dehydrogenase family 3, subfamily A2 [Source:MGI Symbol;Acc:MGI:1353452]	0.0440095	0.743079	1.22726	mMC015459	6132.4	6106.88	6510.95	6743.43	8474.24	7887.21	6247.38	7667.17
Gpc3	glypican 3 [Source:MGI Symbol;Acc:MGI:104903]	0.0440981	0.743079	0.0486316	mMC011305	415.477	1075.67	8942.7	160.791	99.6389	28.6919	1586.96	77.1763
Btbd11	BTB (POZ) domain containing 11 [Source:MGI Symbol;Acc:MGI:1921257]	0.0441498	0.743079	1.81981	mMC019532	247.93	264.4	148.972	333.348	377.839	467.269	213.746	388.977
Tbk1	TANK-binding kinase 1 [Source:MGI Symbol;Acc:MGI:1929658]	0.0441866	0.743079	1.3882	mMC018910	3677.31	4047.8	2780.08	4762.95	4742.22	4901.2	3458.88	4801.61
		0.0444929	0.743079	2.3076	mMC018928	58.1087	39.9454	36.1476	84.3173	165.736	73.7793	43.7786	101.024
Colgalt1	collagen beta(1-O)galactosyltransferase 1 [Source:MGI Symbol;Acc:MGI:1924348]	0.0444969	0.743079	0.670457	mMC001661	13626.5	13823	13164.3	8172.9	11918.2	7672.02	13535.1	9074.7
Mylip	myosin regulatory light chain interacting protein [Source:MGI Symbol;Acc:MGI:2388271]	0.0445218	0.743079	0.311836	mMC016514	46.4869	110.325	179.643	28.4326	35.5149	27.6672	97.3057	30.3434
Sms	spermine synthase [Source:MGI Symbol;Acc:MGI:109490]	0.0445225	0.743079	2.47274	mMC002481	145.272	122.689	69.009	198.048	405.461	231.585	107.143	264.937
Safb	scaffold attachment factor B [Source:MGI Symbol;Acc:MGI:2146974]	0.0445351	0.743079	1.48674	mMR001359	1070.17	1203.12	1189.58	1335.35	1801.39	2092.46	1152.71	1713.78
Rnf138	ring finger protein 138 [Source:MGI Symbol;Acc:MGI:1929211]	0.0445433	0.743079	1.82132	mMA031740	214.034	209.238	188.406	255.893	385.731	516.455	203.582	370.788
		0.0445858	0.743079	1.34491	mMC014315	71.6674	61.8202	70.1044	100.004	99.6389	75.8287	67.7224	91.0808
Rraga	Ras-related GTP binding A [Source:MGI Symbol;Acc:MGI:1915691]	0.044592	0.743079	0.824049	mMC005217	4889.84	4938.96	4105.49	3720.75	4046.72	3684.86	4628.41	3814.04
		0.044603	0.743079	1.78827	mMR030265	60.0456	61.8202	101.87	157.85	110.491	123.99	72.3136	129.316
Zbtb25	zinc finger and BTB domain containing 25 [Source:MGI Symbol;Acc:MGI:99197]	0.0446124	0.743079	0.651461	mMC017231	750.57	607.74	753.623	560.808	472.545	358.649	700.521	456.362
Bloc1s2-ps	biogenesis of lysosomal organelles complex-1, subunit 2, pseudogene [Source:MGI Symbol;Acc:MGI:3702045]	0.044775	0.743079	1.26334	mMC009783	2593.58	2583.13	2052.75	3118.76	2884.6	3082.33	2395.86	3026.79
Mob1a	MOB kinase activator 1A [Source:MGI Symbol;Acc:MGI:2442631]	0.0448285	0.743079	1.86488	mMR030808	2234.28	2574.57	2858.95	3201.12	6343.35	5252.67	2543.02	4742.42
Epha3	Eph receptor A3 [Source:MGI Symbol;Acc:MGI:99612]	0.0448432	0.743079	0.0447102	mMC002917	1048.86	1303.93	5097.91	322.563	145.019	13.3213	1910.39	85.4138
Glipr1	GLI pathogenesis-related 1 (glioma) [Source:MGI Symbol;Acc:MGI:1920940]	0.0449487	0.743079	2.14476	mMC009642	14749.9	11808.6	7004.97	18413.5	21605.9	30256.7	10685.6	22918
Pofut2	protein O-fucosyltransferase 2 [Source:MGI Symbol;Acc:MGI:1916863]	0.0449761	0.743079	0.673957	mMC000971	1544.72	1484.64	1039.52	935.334	963.834	809.522	1335.88	900.325
Zfp787	zinc finger protein 787 [Source:MGI Symbol;Acc:MGI:1914359]	0.045	0.743079	0.691067	mMC024661	369.958	501.219	527.974	359.819	310.755	288.969	460.89	318.506
Dhx9	DEAH (Asp-Glu-Ala-His) box polypeptide 9 [Source:MGI Symbol;Acc:MGI:108177]	0.0450941	0.743079	2.18056	mMC025347	88.1315	140.76	62.4368	178.439	261.429	172.152	91.8368	200.256
Lrif1	ligand dependent nuclear receptor interacting factor 1 [Source:MGI Symbol;Acc:MGI:2445214]	0.0451075	0.743079	1.66776	mMC024236	147.209	158.83	173.07	200.009	259.456	361.723	159.354	265.764
Aspdh	aspartate dehydrogenase domain containing [Source:MGI Symbol;Acc:MGI:1915602]	0.0451557	0.743079	1.42231	mMA032179	57.1402	48.5051	71.1998	78.4347	91.7467	78.9028	58.2196	82.8064
Pml	promyelocytic leukemia [Source:MGI Symbol;Acc:MGI:104662]	0.0451718	0.743079	2.26419	mMA033648	299.26	307.199	243.175	397.076	1026.97	636.346	281.706	637.835
Fam118b	family with sequence similarity 118, member B [Source:MGI Symbol;Acc:MGI:1924483]	0.0451867	0.743079	1.39087	mMC010637	241.151	280.569	283.704	303.935	405.461	419.107	267.751	372.407
		0.0452081	0.743079	0.559768	mMC015750	41.6445	55.1626	70.1044	24.5109	29.5957	38.9391	54.4063	30.4549
Mcm4	minichromosome maintenance deficient 4 homolog (S. cerevisiae) [Source:MGI Symbol;Acc:MGI:103199]	0.0452126	0.743079	1.99977	mMC016857	6259.27	7983.36	4366.19	9302.36	16387.1	11446	6020.11	12038.8
Eefsec	eukaryotic elongation factor, selenocysteine-tRNA-specific [Source:MGI Symbol;Acc:MGI:2137092]	0.0452759	0.743079	1.50027	mMC005562	342.841	277.715	399.814	419.626	538.642	568.715	336.396	504.683
Eif4e3	eukaryotic translation initiation factor 4E member 3 [Source:MGI Symbol;Acc:MGI:1914142]	0.0453037	0.743079	0.344778	mMR029255	780.593	797.005	914.644	430.411	394.61	137.311	828.665	285.706
Prpsap2	phosphoribosyl pyrophosphate synthetase-associated protein 2 [Source:MGI Symbol;Acc:MGI:2384838]	0.0453308	0.743079	1.59249	mMC024072	332.188	369.97	325.328	402.958	683.661	586.135	341.946	544.544
Cpxm1	carboxypeptidase X 1 (M14 family) [Source:MGI Symbol;Acc:MGI:1934569]	0.0453362	0.743079	0.16564	mMC021543	907.464	1876.48	4577.6	751.993	229.86	204.942	1982.76	328.425
Cfl2	cofilin 2, muscle [Source:MGI Symbol;Acc:MGI:101763]	0.0453363	0.743079	0.475414	mMC007145	3165.95	3162.34	1546.68	1256.92	1358.44	974.501	2492.52	1184.98
Tardbp	TAR DNA binding protein [Source:MGI Symbol;Acc:MGI:2387629]	0.0454547	0.743079	2.25382	mMR029084	385.454	540.213	387.765	701.991	1628.75	808.498	432.217	974.141
Hist1h2bk	histone cluster 1, H2bk [Source:MGI Symbol;Acc:MGI:2448399]	0.0454995	0.743079	0.539563	mMC022663	3474.9	3192.78	4251.18	2664.82	1352.52	2055.57	3613.04	1949.46
Clock	circadian locomotor output cycles kaput [Source:MGI Symbol;Acc:MGI:99698]	0.0457086	0.743079	1.27533	mMC022282	365.116	362.361	328.615	411.782	523.844	418.082	351.631	448.446
Dgkq	diacylglycerol kinase, theta [Source:MGI Symbol;Acc:MGI:102918]	0.0457736	0.743079	1.35478	mMR027749	2203.29	1721.45	1786.57	2256.96	2907.29	2567.93	1892.32	2563.69
Ube2d2a	ubiquitin-conjugating enzyme E2D 2A [Source:MGI Symbol;Acc:MGI:1930715]	0.0457853	0.743079	0.634817	mMC019516	2851.2	1788.03	2360.55	1644.19	1506.42	1242.98	2291.6	1454.75
Gm10222	predicted gene 10222 [Source:MGI Symbol;Acc:MGI:3642643]	0.045823	0.743079	1.30604	mMR026273	23874.9	27687.8	25465.4	31828.8	39353.4	29940	25628.7	33472.3
Mpdz	multiple PDZ domain protein [Source:MGI Symbol;Acc:MGI:1343489]	0.0458432	0.743079	0.543376	mMC020663	1395.58	1091.84	853.302	814.741	512.006	500.059	1091.45	593.069
Fcer1g	Fc receptor, IgE, high affinity I, gamma polypeptide [Source:MGI Symbol;Acc:MGI:95496]	0.0458858	0.743079	0.15023	mMC004546	1403.32	406.111	1229.02	331.387	137.127	52.2603	888.083	133.417
Slc16a2	solute carrier family 16 (monocarboxylic acid transporters), member 2 [Source:MGI Symbol;Acc:MGI:1203732]	0.0458972	0.743079	1.51309	mMC021584	106.533	146.466	117.206	230.402	167.709	163.954	122.29	185.035
Fhl2	four and a half LIM domains 2 [Source:MGI Symbol;Acc:MGI:1338762]	0.0459222	0.743079	0.249784	mMC009365	4668.06	7826.44	13412.9	4098.22	1595.21	1168.17	7883.91	1969.27
4930518I15Rik	RIKEN cDNA 4930518I15 gene [Source:MGI Symbol;Acc:MGI:1921954]	0.0459267	0.743079	1.93184	mMC002500	157.862	200.678	247.556	291.189	552.453	351.476	198.678	383.815
Orai3	ORAI calcium release-activated calcium modulator 3 [Source:MGI Symbol;Acc:MGI:3039586]	0.0459545	0.743079	0.546756	mMC011479	443.563	322.416	573.98	221.578	198.291	305.364	434.6	237.62
BC029722	cDNA sequence BC029722 [Source:MGI Symbol;Acc:MGI:3584273]	0.0460517	0.743079	1.26875	mMC007712	2445.41	2662.07	2357.26	3146.21	2771.15	3594.69	2485	3152.85
Zcchc3	zinc finger, CCHC domain containing 3 [Source:MGI Symbol;Acc:MGI:1915167]	0.0460539	0.743079	0.31781	mMC019213	82.3206	75.1353	115.015	58.8261	23.6766	16.3954	89.2694	28.3707
H2afj	H2A histone family, member J [Source:MGI Symbol;Acc:MGI:3606192]	0.046242	0.743079	3.34892	mMC015451	302.165	309.101	216.886	403.939	1347.59	1397.71	272.6	912.914
Mpeg1	macrophage expressed gene 1 [Source:MGI Symbol;Acc:MGI:1333743]	0.0465691	0.743079	0.25299	mMC013032	995.595	462.225	971.604	400.998	187.44	96.3229	764.672	193.454
Grasp	GRP1 (general receptor for phosphoinositides 1)-associated scaffold protein [Source:MGI Symbol;Acc:MGI:1860303]	0.046622	0.743079	1.2577	mMC010366	263.426	236.819	201.55	296.091	300.89	280.771	232.534	292.457
Cep57	centrosomal protein 57 [Source:MGI Symbol;Acc:MGI:1915551]	0.046629	0.743079	1.59781	mMA033307	275.048	284.373	324.233	421.587	383.758	639.42	293.8	469.436
Pxdn	peroxidasin homolog (Drosophila) [Source:MGI Symbol;Acc:MGI:1916925]	0.0466729	0.743079	0.786699	mMA031504	908.432	891.162	1042.8	695.128	852.357	693.73	945.113	743.519
Shmt1	serine hydroxymethyltransferase 1 (soluble) [Source:MGI Symbol;Acc:MGI:98299]	0.0467115	0.743079	4.26254	mMC011788	322.503	311.003	136.923	496.1	2170.35	987.822	239.474	1020.77
Dst	dystonin [Source:MGI Symbol;Acc:MGI:104627]	0.0467117	0.743079	0.792803	mMR029613	2985.82	2327.29	2640.97	2090.29	2236.45	1956.18	2637.7	2091.18
Ctbp2	C-terminal binding protein 2 [Source:MGI Symbol;Acc:MGI:1201686]	0.0467653	0.743079	0.590113	mMC016406	1040.15	1633	1888.44	849.056	952.982	814.646	1474.78	870.289
		0.0467719	0.743079	2.4016	mMC011240	70.6989	54.2116	81.0582	93.1413	194.345	237.733	67.7278	162.655
Rad50	RAD50 homolog (S. cerevisiae) [Source:MGI Symbol;Acc:MGI:109292]	0.0467733	0.743079	1.76998	mMC005055	668.25	489.806	374.621	756.895	1093.07	821.819	496.804	879.332
Ythdf1	YTH domain family 1 [Source:MGI Symbol;Acc:MGI:1917431]	0.046784	0.743079	1.26195	mMC002017	2396.98	2727.7	2502.95	2824.63	3631.39	3206.32	2538.85	3203.91
Itga9	integrin alpha 9 [Source:MGI Symbol;Acc:MGI:104756]	0.0468182	0.743079	0.343922	mMC014684	169.484	276.764	227.839	150.006	60.178	48.1615	220.27	75.7558
Prr14	proline rich 14 [Source:MGI Symbol;Acc:MGI:2384565]	0.0468472	0.743079	0.714509	mMC002805	7373.02	7532.55	6964.44	6354.19	5222.66	4251.53	7286.03	5205.94
Luzp1	leucine zipper protein 1 [Source:MGI Symbol;Acc:MGI:107629]	0.0468746	0.743079	0.519526	mMC022750	577.213	585.865	1061.42	294.13	413.354	413.984	710.68	369.217
Ptprf	protein tyrosine phosphatase, receptor type, F [Source:MGI Symbol;Acc:MGI:102695]	0.0469905	0.743079	0.615656	mMA033216	51.3293	68.4778	61.3414	48.0413	36.5014	28.6919	59.9638	36.9171
		0.0470373	0.743079	2.01958	mMC023026	39.7076	50.4072	72.2952	84.3173	149.952	94.2735	52.4999	106.028
Abhd11	abhydrolase domain containing 11 [Source:MGI Symbol;Acc:MGI:1916008]	0.0470887	0.743079	1.60779	mMC010304	2875.41	3446.71	2748.31	4432.54	6509.08	3923.62	3008.78	4837.49
Prpf40b	PRP40 pre-mRNA processing factor 40 homolog B (yeast) [Source:MGI Symbol;Acc:MGI:1925583]	0.0471484	0.743079	1.8488	mMC016027	250.836	185.461	337.378	364.722	573.17	474.442	250.372	462.888
Vamp1	vesicle-associated membrane protein 1 [Source:MGI Symbol;Acc:MGI:1313276]	0.0472318	0.743079	0.645604	mMA032354	614.015	631.517	761.29	333.348	442.949	537.974	665.842	429.87
Chst15	carbohydrate (N-acetylgalactosamine 4-sulfate 6-O) sulfotransferase 15 [Source:MGI Symbol;Acc:MGI:1924840]	0.0473172	0.743079	0.197934	mMR030059	348.652	409.915	667.087	263.737	58.2049	48.1615	456.832	90.4225
Epb41l3	erythrocyte membrane protein band 4.1 like 3 [Source:MGI Symbol;Acc:MGI:103008]	0.0473329	0.743079	2.34282	mMA035704	141.398	312.905	227.839	344.132	611.645	615.852	216.02	506.097
Map2k4	mitogen-activated protein kinase kinase 4 [Source:MGI Symbol;Acc:MGI:1346869]	0.0473718	0.743079	1.53588	mMC017623	725.39	1115.62	1142.48	1603.99	1441.31	1448.94	974.194	1496.25
1810043G02Rik	RIKEN cDNA 1810043G02 gene [Source:MGI Symbol;Acc:MGI:1915134]	0.0474092	0.743079	1.30117	mMR027506	275.048	289.128	289.181	363.741	437.03	318.685	284.374	370.017
Gsta2	glutathione S-transferase, alpha 2 (Yc2) [Source:MGI Symbol;Acc:MGI:95863]	0.0474285	0.743079	3.1236	mMR026157	234.372	544.018	142.4	785.328	986.524	714.224	262.83	820.977
Dkk3	dickkopf WNT signaling pathway inhibitor 3 [Source:MGI Symbol;Acc:MGI:1354952]	0.0474288	0.743079	0.186784	mMC016025	12734.5	6365.58	20159.4	5391.41	1976.99	999.094	11778.8	2200.08
Cd59b	CD59b antigen [Source:MGI Symbol;Acc:MGI:1888996]	0.0474796	0.743079	0.416801	mMR028870	167.547	133.151	349.427	101.965	73.0028	75.8287	198.28	82.6434
Sbsn	suprabasin [Source:MGI Symbol;Acc:MGI:2446326]	0.0475712	0.743079	4.45159	mMA034523	38.7391	35.19	27.3845	56.8652	336.405	172.152	33.4214	148.778
Mtfr1l	mitochondrial fission regulator 1-like [Source:MGI Symbol;Acc:MGI:1924074]	0.0476111	0.743079	0.689623	mMC002082	674.06	550.675	544.405	505.904	358.108	365.822	586.821	404.685
Dpep1	dipeptidase 1 (renal) [Source:MGI Symbol;Acc:MGI:94917]	0.0476502	0.743079	0.191299	mMC005634	845.481	1884.09	5739.8	484.335	479.451	275.648	2091.06	400.019
Ergic2	ERGIC and golgi 2 [Source:MGI Symbol;Acc:MGI:1914706]	0.047851	0.743079	1.89492	mMC005471	215.971	199.727	141.304	281.385	501.154	294.092	182.668	346.14
Tnfsf9	tumor necrosis factor (ligand) superfamily, member 9 [Source:MGI Symbol;Acc:MGI:1101058]	0.0479018	0.743079	2.971	mMC015409	216.939	258.694	151.163	321.582	636.308	1087.22	203.95	605.934
Sart3	squamous cell carcinoma antigen recognized by T cells 3 [Source:MGI Symbol;Acc:MGI:1858230]	0.0479207	0.743079	1.74469	mMC006829	428.067	364.264	262.892	463.745	732.987	640.445	344.801	601.57
Pde2a	phosphodiesterase 2A, cGMP-stimulated [Source:MGI Symbol;Acc:MGI:2446107]	0.0479339	0.743079	0.524931	mMC023815	92.0054	73.2332	136.923	43.1391	67.0836	46.112	97.3491	51.1015
Adat1	adenosine deaminase, tRNA-specific 1 [Source:MGI Symbol;Acc:MGI:1353631]	0.0479364	0.743079	1.96859	mMC020537	89.1	53.2605	65.7229	96.0826	184.48	134.237	67.8161	133.502
Lsm3	LSM3 homolog, U6 small nuclear RNA associated (S. cerevisiae) [Source:MGI Symbol;Acc:MGI:1914928]	0.0479669	0.743079	2.05835	mMC019663	54.2348	63.7224	70.1044	83.3369	130.221	194.695	62.3407	128.319
Creb3l3	cAMP responsive element binding protein 3-like 3 [Source:MGI Symbol;Acc:MGI:2384786]	0.0480343	0.743079	0.460955	mMC007401	115.249	155.977	108.443	84.3173	63.1375	35.8649	124.92	57.5826
		0.0480717	0.743079	0.136297	mMA032280	54.2348	58.967	64.6275	21.5696	11.8383	2.04942	59.1246	8.05849
		0.0480771	0.743079	0.281852	mMC017763	125.902	226.357	181.833	110.789	36.5014	28.6919	173.048	48.774
Oxnad1	oxidoreductase NAD-binding domain containing 1 [Source:MGI Symbol;Acc:MGI:1916953]	0.0481345	0.743079	1.31112	mMC025754	1674.5	1565.48	1319.93	1877.53	2258.15	1839.36	1512.5	1983.06
		0.0481684	0.743079	0.74931	mMC002695	54.2348	50.4072	48.1968	46.0804	33.5418	35.8649	50.8858	38.1292
Atxn7l2	ataxin 7-like 2 [Source:MGI Symbol;Acc:MGI:1919772]	0.0481797	0.743079	1.4454	mMC018609	724.421	678.12	740.478	812.78	1071.36	1261.42	713.844	1031.79
Tmub2	transmembrane and ubiquitin-like domain containing 2 [Source:MGI Symbol;Acc:MGI:1919303]	0.0482126	0.743079	1.14112	mMC010255	520.073	486.953	545.5	616.693	552.453	602.531	516.95	589.904
Emc10	ER membrane protein complex subunit 10 [Source:MGI Symbol;Acc:MGI:1916933]	0.0483281	0.743079	0.664321	mMC003569	11375.7	9128.47	13982.5	6504.2	7717.58	8480.52	11323.7	7522.56
Picalm	phosphatidylinositol binding clathrin assembly protein [Source:MGI Symbol;Acc:MGI:2385902]	0.0483722	0.743079	0.458411	mMC010505	8863.51	11130.5	14144.7	7835.63	3380.82	5074.37	11174.7	5122.63
Arglu1	arginine and glutamate rich 1 [Source:MGI Symbol;Acc:MGI:2442985]	0.0483737	0.743079	2.086	mMC008111	61.0141	64.6734	56.9598	79.4152	194.345	132.188	60.8007	126.83
Cuedc2	CUE domain containing 2 [Source:MGI Symbol;Acc:MGI:1914366]	0.0484082	0.743079	2.31159	mMC022543	3617.26	2858	4038.67	6441.45	5721.84	13992.4	3469.18	8019.32
Pmm1	phosphomannomutase 1 [Source:MGI Symbol;Acc:MGI:1353418]	0.0484157	0.743079	1.47456	mMC004009	2701.08	2073.35	2543.48	3102.09	3295.98	4466.72	2424.08	3574.45
Gnat1	guanine nucleotide binding protein, alpha transducing 1 [Source:MGI Symbol;Acc:MGI:95778]	0.0484778	0.743079	2.02509	mMC008630	660.502	621.055	695.567	809.839	1703.73	1717.42	658.336	1333.19
Hoxa7	homeobox A7 [Source:MGI Symbol;Acc:MGI:96179]	0.0484984	0.743079	0.166324	mMC004585	1952.45	1498.9	2254.3	987.297	270.308	113.743	1875.52	311.944
Mfge8	milk fat globule-EGF factor 8 protein [Source:MGI Symbol;Acc:MGI:102768]	0.0485116	0.743079	0.62993	mMC002993	11072.6	8915.42	10361.2	6856.18	7873.45	4736.22	10075.5	6346.87
Copz2	coatomer protein complex, subunit zeta 2 [Source:MGI Symbol;Acc:MGI:1929008]	0.0485261	0.743079	0.746322	mMA032995	5351.81	5516.26	5693.79	4885.5	3425.21	4175.7	5518.86	4118.84
Pigk	phosphatidylinositol glycan anchor biosynthesis, class K [Source:MGI Symbol;Acc:MGI:1913863]	0.04856	0.743079	0.504228	mMR030360	333.156	543.067	244.27	205.891	160.803	171.127	353.555	178.272
Cmc2	COX assembly mitochondrial protein 2 [Source:MGI Symbol;Acc:MGI:1913781]	0.048627	0.743079	1.35421	mMA034068	1221.25	1222.14	978.176	1674.58	1649.47	1312.66	1134.44	1536.27
Pced1b	PC-esterase domain containing 1B [Source:MGI Symbol;Acc:MGI:2446270]	0.0486476	0.743079	1.71848	mMC020147	535.568	542.116	395.433	676.5	747.785	1151.78	486.026	835.226
Fh1	fumarate hydratase 1 [Source:MGI Symbol;Acc:MGI:95530]	0.048669	0.743079	1.38344	mMC004822	6543.04	4872.38	5427.62	6609.11	8445.63	8207.94	5572.41	7709.09
Msrb3	methionine sulfoxide reductase B3 [Source:MGI Symbol;Acc:MGI:2443538]	0.0487112	0.743079	0.52844	mMC012959	5815.71	6590.98	6411.27	5106.1	2409.09	2948.1	6263.72	3310
Col4a2	collagen, type IV, alpha 2 [Source:MGI Symbol;Acc:MGI:88455]	0.0488179	0.743079	0.434748	mMC008904	23240.6	33242.1	26104	11186.8	19657.5	7535.73	27219.6	11833.7
Ccne1	cyclin E1 [Source:MGI Symbol;Acc:MGI:88316]	0.0488251	0.743079	1.2352	mMA031992	465.838	452.714	379.002	506.885	516.939	574.863	430.758	532.073
Fut10	fucosyltransferase 10 [Source:MGI Symbol;Acc:MGI:2384748]	0.0488477	0.743079	2.1446	mMR026988	174.326	138.858	138.018	190.204	405.461	427.305	149.494	320.604
Hnrnpul1	heterogeneous nuclear ribonucleoprotein U-like 1 [Source:MGI Symbol;Acc:MGI:2443517]	0.0491249	0.743079	0.541327	mMA033173	48.4239	80.8418	51.4829	41.1782	31.5688	24.5931	58.63	31.738
Fjx1	four jointed box 1 (Drosophila) [Source:MGI Symbol;Acc:MGI:1341907]	0.049269	0.743079	0.570124	mMC003778	812.553	691.435	460.06	443.156	355.149	304.339	637	363.169
Abcc5	ATP-binding cassette, sub-family C (CFTR/MRP), member 5 [Source:MGI Symbol;Acc:MGI:1351644]	0.0492724	0.743079	1.61801	mMR026160	1521.48	1091.84	1499.58	1997.14	1848.75	2857.92	1355.6	2193.37
Pstpip1	proline-serine-threonine phosphatase-interacting protein 1 [Source:MGI Symbol;Acc:MGI:1321396]	0.0492939	0.743079	2.10437	mMC007579	424.193	239.672	246.461	441.195	618.55	855.634	292.624	615.788
Chd9	chromodomain helicase DNA binding protein 9 [Source:MGI Symbol;Acc:MGI:1924001]	0.049308	0.743079	0.726044	mMC016349	1277.42	1578.79	1411.95	848.076	1117.73	1149.73	1417.4	1029.1
Olfr669	olfactory receptor 669 [Source:MGI Symbol;Acc:MGI:3030503]	0.0493309	0.743079	1.65849	mMC015692	66.825	38.0432	43.8153	85.2978	70.0432	85.0511	48.115	79.7985
Tmem180	transmembrane protein 180 [Source:MGI Symbol;Acc:MGI:1922396]	0.0493363	0.743079	1.63034	mMC007892	1017.87	721.87	743.764	1209.86	1121.68	1745.08	817.577	1332.93
Lancl2	LanC (bacterial lantibiotic synthetase component C)-like 2 [Source:MGI Symbol;Acc:MGI:1919085]	0.04934	0.743079	1.26357	mMC018926	1898.22	1782.32	2268.54	2336.37	2453.48	2701.14	1972.54	2492.44
		0.0494099	0.743079	3.26583	mMC025072	963.635	1259.23	408.577	1567.71	3614.62	3047.49	791.463	2584.78
Tctn3	tectonic family member 3 [Source:MGI Symbol;Acc:MGI:1914840]	0.0494262	0.743079	1.36346	mMR029263	498.766	416.573	557.549	609.83	766.529	628.148	487.48	664.661
St8sia4	ST8 alpha-N-acetyl-neuraminide alpha-2,8-sialyltransferase 4 [Source:MGI Symbol;Acc:MGI:106018]	0.0494454	0.743079	0.0608423	mMR030650	43.5815	52.3094	276.036	12.7456	10.8518	1.02471	85.6938	5.2138
Abcg1	ATP-binding cassette, sub-family G (WHITE), member 1 [Source:MGI Symbol;Acc:MGI:107704]	0.0494486	0.743079	0.374625	mMR027379	85.226	94.1569	84.3444	50.0021	43.4071	16.3954	87.7998	32.892
Pcgf5	polycomb group ring finger 5 [Source:MGI Symbol;Acc:MGI:1923505]	0.049463	0.743079	0.77765	mMC022660	2008.62	2340.61	2079.03	1904	1456.11	1657.98	2138.11	1662.7
Nedd9	neural precursor cell expressed, developmentally down-regulated gene 9 [Source:MGI Symbol;Acc:MGI:97302]	0.0494846	0.743079	0.27819	mMA035034	4203.19	4291.27	8202.22	3294.26	957.915	1009.34	5288.9	1471.32
Soat2	sterol O-acyltransferase 2 [Source:MGI Symbol;Acc:MGI:1332226]	0.049548	0.743079	0.405861	mMC023539	92.0054	63.7224	177.452	50.0021	42.4205	32.7908	101.328	41.125
Baz2b	bromodomain adjacent to zinc finger domain, 2B [Source:MGI Symbol;Acc:MGI:2442782]	0.0495789	0.743079	1.69495	mMA033020	131.713	136.956	153.353	164.713	287.078	284.87	140.378	237.935
Mia3	melanoma inhibitory activity 3 [Source:MGI Symbol;Acc:MGI:2443183]	0.04965	0.743079	0.808516	mMA032836	3481.68	3576.06	3498.65	3259.94	2816.53	2507.47	3518.56	2844.81
Ube2l3	ubiquitin-conjugating enzyme E2L 3 [Source:MGI Symbol;Acc:MGI:109240]	0.0496586	0.743079	1.3079	mMC010957	13796.9	13934.3	14857.8	15897.7	21966.9	18299.3	14188.6	18557.2
Mmp23	matrix metallopeptidase 23 [Source:MGI Symbol;Acc:MGI:1347361]	0.0496751	0.743079	0.151219	mMC005274	4525.7	3677.83	10884.8	2601.09	697.472	345.328	5658.47	855.667
Rpl10	ribosomal protein L10 [Source:MGI Symbol;Acc:MGI:105943]	0.0497216	0.743079	1.51207	mMR028683	436.783	495.513	307.802	571.593	661.958	608.679	405.382	612.964
Fmod	fibromodulin [Source:MGI Symbol;Acc:MGI:1328364]	0.0497259	0.743079	0.198428	mMC011755	1112.78	2203.65	7993	564.73	472.545	573.839	2696.21	535.005
Sgk3	serum/glucocorticoid regulated kinase 3 [Source:MGI Symbol;Acc:MGI:2182368]	0.0497485	0.743079	0.690984	mMA034386	222.75	174.048	150.067	111.77	122.329	140.386	179.856	124.277
Ttf1	transcription termination factor, RNA polymerase I [Source:MGI Symbol;Acc:MGI:105044]	0.0498088	0.743079	1.15766	mMC024460	178.2	213.042	199.359	228.441	223.941	229.535	196.337	227.293
Col5a3	collagen, type V, alpha 3 [Source:MGI Symbol;Acc:MGI:1858212]	0.0499518	0.743079	0.506657	mMC018451	253.741	408.013	274.941	131.378	123.315	228.511	305.329	154.697
		0.0499633	0.743079	0.281565	mMC014787	75.5413	153.124	113.92	69.6108	21.7035	19.4695	109.633	30.8689
Tmx3	thioredoxin-related transmembrane protein 3 [Source:MGI Symbol;Acc:MGI:2442418]	0.0499835	0.743079	0.80086	mMC021111	1452.72	1389.53	1350.61	1275.54	976.659	1124.11	1396.99	1118.79
Fcgr2b	Fc receptor, IgG, low affinity IIb [Source:MGI Symbol;Acc:MGI:95499]	0.04999	0.743079	0.453005	mMC020253	127.839	106.521	132.541	88.2391	56.2319	33.8155	121.754	55.1552
