# Supplementary material for: c-Kit modifies the inflammatory status of smooth muscle cells
Source: PeerJ. 2017 Jun 13;5:e3418. doi: 10.7717/peerj.3418 (PMC5472039; doi:10.7717/peerj.3418)
Supplement: Supplemental Information 4 [file peerj-05-3418-s007.xlsx]

## Sheet: Sheet1
	Firefly	1st Batch	1st Batch	2nd Batch	2nd Batch	3rd Batch	3rd Batch
	WT	4366	1234	4236	4134	4266	3169
	WWv	15138	16500	15965	15688	20873	19209
	Rescue	7559	2694	3946	3399	4489	3683
	Renilla	1st Batch	1st Batch	2nd Batch	2nd Batch	3rd Batch	3rd Batch
	WT	160003	184759	159797	355444	160246	135178
	WWv	310013	454327	472760	534824	513371	487329
	Rescue	177701	190815	114520	155089	197456	169126
	Ratio	1st Batch	1st Batch	2nd Batch	2nd Batch	3rd Batch	3rd Batch
	WT	0.027287	0.00667897	0.0265086	0.0116305	0.0266216	0.0234432
	WWv	0.0488302	0.0363175	0.0337698	0.029333	0.0406587	0.0394169
	Rescue	0.0425377	0.0141184	0.0344569	0.0219164	0.0227342	0.0217767
	Ratio AVE	1st Batch	2nd Batch	3rd Batch	AVE	SD	p value
	WT	0.016983	0.0190696	0.0250324	0.0203616	0.00341079	0.0126393
	WWv	0.0425738	0.0315514	0.0400378	0.0380543	0.00471339
	Rescue	0.0283281	0.0281867	0.0222554	0.0262567	0.00282993	0.0385985
	standardization	AVE	SD		standardization				p value
	WT	1	0.167511		WT	0.834053	0.936528	1.22937
	WWv	1.86892	0.389351		WWv	2.09085	1.54952	1.9663	0.0126393
	Rescue	1.28952	0.256858		Rescue	1.39122	1.38428	1.09299	0.0385985
