# Supplementary material for: c-Kit modifies the inflammatory status of smooth muscle cells
Source: PeerJ. 2017 Jun 13;5:e3418. doi: 10.7717/peerj.3418 (PMC5472039; doi:10.7717/peerj.3418)
Supplement: Supplemental Information 5 [file peerj-05-3418-s008.xlsx]

## Sheet: Sheet1
standard
	0.847	0.595	0.305	0.232	0.148	0.109	0.083
	0.855	0.598	0.385	0.236	0.158	0.106	0.078
AVE	0.851	0.5965	0.345	0.234	0.153	0.1075	0.0805
Conc	300	150	75	37.5	18.75	9.375	0
1st	WT	WWv	KitR		3rd	WT	WWv	KitR
p65	0.981	1.023	1.016		p65	1.017	0.974	0.996
	0.941	1.039	1.015			0.915	1.037	1.018
AVE	0.961	1.031	1.0155		AVE	0.966	1.0055	1.007
p-p65	0.393	0.845	0.521		p-p65	0.445	0.535	0.557
	0.393	0.845	0.521			0.435	0.653	0.575
AVE	0.393	0.845	0.521		AVE	0.44	0.594	0.566
ratio	0.408949	0.819593	0.513048		ratio	0.455487	0.590751	0.562066
2nd	WT	WWv	KitR
p65	0.954	1.007	1.017
	0.99	1.039	0.994			WT	WWv	KitR
AVE	0.972	1.023	1.0055		1st	0.408949	0.819593	0.513048
					2nd	0.450617	0.811339	0.494281
p-p65	0.438	0.83	0.497		3rd	0.455487	0.590751	0.562066
	0.438	0.83	0.497
AVE	0.438	0.83	0.497		Protein	110.63	263.044	149.267
ratio	0.450617	0.811339	0.494281			126.095	259.981	142.302
						127.902	178.107	167.46
					AVE	121.542	233.711	153.01
							0.0167273	0.0275957
							p value	p value
standardization
					Mean	SD
	WT	0.408949	0.450617	0.455487	0.438351	0.025579
	WWv	0.819593	0.811339	0.590751	0.740561	0.129805
	KitR	0.513048	0.494281	0.562066	0.523132	0.034999
standardization				standardization				p value
	WT	1	0.0583527		0.932926	1.02798	1.03909
	WWv	1.68942	0.3121		1.86972	1.85089	1.34767	0.0167273
	KitR	1.19341	0.105945		1.1704	1.12759	1.28223	0.0487504
